# Supplementary material for: Determinants of patient and health system delay among Italian and foreign-born patients with pulmonary tuberculosis: a multicentre cross-sectional study
Source: PubMed Central journal article supplement — BMJ Open. 2018 Aug 5;8(8):e019673. doi: 10.1136/bmjopen-2017-019673 (PMC6078265; doi:10.1136/bmjopen-2017-019673), 2018-08-05
Supplement: bmjopen-2017-019673.draft_revisions.pdf [file bmjopen-2017-019673.draft_revisions.pdf]

# BMJ Open

BMJ Open is committed to open peer review. As part of this commitment we make the peer review history of every article we publish publicly available.

When an article is published we post the peer reviewers' comments and the authors' responses online. We also post the versions of the paper that were used during peer review. These are the versions that the peer review comments apply to.

The versions of the paper that follow are the versions that were submitted during the peer review process. They are not the versions of record or the final published versions. They should not be cited or distributed as the published version of this manuscript.

BMJ Open is an open access journal and the full, final, typeset and author-corrected version of record of the manuscript is available on our site with no access controls, subscription charges or pay-per-view fees (<http://bmjopen.bmj.com>).

If you have any questions on BMJ Open's open peer review process please email [info.bmjopen@bmj.com](mailto:info.bmjopen@bmj.com)

# BMJ Open

## Determinants of patient and health system delay among Italian and foreign-born pulmonary tuberculosis patients

|                                 |                                                                                                                                                                                                                                                                                                                                                                                                                                                                                                                                                                                                                                                                                                                                                                                                                                                                                                                                                                                                                        |
|---------------------------------|------------------------------------------------------------------------------------------------------------------------------------------------------------------------------------------------------------------------------------------------------------------------------------------------------------------------------------------------------------------------------------------------------------------------------------------------------------------------------------------------------------------------------------------------------------------------------------------------------------------------------------------------------------------------------------------------------------------------------------------------------------------------------------------------------------------------------------------------------------------------------------------------------------------------------------------------------------------------------------------------------------------------|
| Journal:                        | <i>BMJ Open</i>                                                                                                                                                                                                                                                                                                                                                                                                                                                                                                                                                                                                                                                                                                                                                                                                                                                                                                                                                                                                        |
| Manuscript ID                   | bmjopen-2017-019673                                                                                                                                                                                                                                                                                                                                                                                                                                                                                                                                                                                                                                                                                                                                                                                                                                                                                                                                                                                                    |
| Article Type:                   | Research                                                                                                                                                                                                                                                                                                                                                                                                                                                                                                                                                                                                                                                                                                                                                                                                                                                                                                                                                                                                               |
| Date Submitted by the Author:   | 25-Sep-2017                                                                                                                                                                                                                                                                                                                                                                                                                                                                                                                                                                                                                                                                                                                                                                                                                                                                                                                                                                                                            |
| Complete List of Authors:       | <p>Quattrocchi, Annalisa; University of Catania, GF Ingrassia<br/> Barchitta, Martina; University of Catania, GF Ingrassia; LaPoSS, Laboratory of Policies and Social Services, University of Catania, Catania, Italy<br/> Nobile, Carmelo; University of Catanzaro "Magna Græcia", Department of Health Sciences<br/> Prato, Rosa; University of Foggia, Department of Medical and Surgical Sciences<br/> Sotgiu, Giovanni; University of Sassari, Department of Biomedical Sciences, Clinical Epidemiology and Medical Statistics Unit<br/> Casuccio, Alessandra; University of Palermo, Department of Sciences for Health Promotion and Mother-Child Care "G. D'Alessandro"<br/> Vitale, Francesco; University of Palermo, Department of Sciences for Health Promotion "G. D'Alessandro" – Hygiene section<br/> Agodi, Antonella; University of Catania, GF Ingrassia; LaPoSS, Laboratory of Policies and Social Services, University of Catania, Catania, Italy<br/> CCM 2013, TB network; CCM 2013 TB network</p> |
| <b>Primary Subject Heading</b>: | Public health                                                                                                                                                                                                                                                                                                                                                                                                                                                                                                                                                                                                                                                                                                                                                                                                                                                                                                                                                                                                          |
| Secondary Subject Heading:      | Epidemiology, Health policy                                                                                                                                                                                                                                                                                                                                                                                                                                                                                                                                                                                                                                                                                                                                                                                                                                                                                                                                                                                            |
| Keywords:                       | Surveillance, Public health policy, Social epidemiology, Quality in health care < HEALTH SERVICES ADMINISTRATION & MANAGEMENT, Epidemiology < INFECTIOUS DISEASES                                                                                                                                                                                                                                                                                                                                                                                                                                                                                                                                                                                                                                                                                                                                                                                                                                                      |
|                                 |                                                                                                                                                                                                                                                                                                                                                                                                                                                                                                                                                                                                                                                                                                                                                                                                                                                                                                                                                                                                                        |

SCHOLARONE™  
Manuscripts

1  
2  
3 **Determinants of patient and health system delay among Italian and foreign-born pulmonary**  
4 **tuberculosis patients**  
5  
6  
7  
8  
9

10 **Authors:** Annalisa Quattrocchi<sup>1</sup>, Martina Barchitta<sup>1,2</sup>, Carmelo Nobile<sup>3</sup>, Rosa Prato<sup>4</sup>, Giovanni Sotgiu<sup>5</sup>,  
11 Alessandra Casuccio<sup>6</sup>, Francesco Vitale<sup>6</sup>, Antonella Agodi<sup>1,2\*</sup>, and the CCM 2013 TB network<sup>7</sup>  
12  
13

14 To the memory of Professor Caterina Mammina, University of Palermo, Coordinator of the project  
15  
16  
17

18 **Affiliations:**

19 <sup>1</sup>Department of Medical and Surgical Sciences and Advanced Technologies “GF Ingrassia”, University of  
20 Catania, Italy

21 <sup>2</sup>LaPoSS, Laboratory of Policies and Social Services, University of Catania, Catania, Italy

22 <sup>3</sup>Department of Health Sciences, University of Catanzaro 'Magna Græcia', Catanzaro, Italy

23 <sup>4</sup>Department of Medical and Surgical Sciences, University of Foggia, Foggia, Italy

24 <sup>5</sup>University of Sassari, Department of Biomedical Sciences, Clinical Epidemiology and Medical Statistics  
25 Unit, Sassari, Italy

26 <sup>6</sup>Department of Sciences for Health Promotion and Mother-Child Care "G. D'Alessandro", University of  
27 Palermo, Italy

28 <sup>7</sup>CCM 2013 TB network: Alessandro Bisbano, Celestino Bonura, Bruno Cacopardo, Maria Giovanna  
29 Cappelli, Antonio Cascio, Francesco Cesario, Paola Di Carlo, Anna Di Taranto, Francesca Fortunato,  
30 Antonina Franco, Anna Grimaldi, Carmelo Iacobello, Maria Clara La Rosa, Valentina Mascaro, Andrea  
31 Maugeri, Arturo Montineri, Salvatore Nisticò, Cecilia Occhino, Grazia Pantò, Maria Polimeni, Vincenzo  
32 Portelli, Graziano Provenzano, Pasquale Quartararo, Francesco Quintieri, Salvatore Requirez, Francesca  
33 Savalli, Consiglia Venitucci, Maria Teresa Zorzetto, Rossella Zucco  
34

35 **\*Corresponding author:**

36 Professor Antonella Agodi  
37 Department *GF Ingrassia*  
38 University of Catania, Italy  
39 Via S. Sofia, 87  
40 Comparto 10 Edificio C  
41 95123 Catania Italy  
42 Tel/Fax: +39.095.3782183  
43 Mobile: +39.348.3538195  
44 eMail: [agodia@unict.it](mailto:agodia@unict.it)  
45  
46

47 **Word count:** 2998  
48  
49  
50  
51  
52  
53  
54  
55  
56  
57  
58  
59  
60

## ABSTRACT

### Objectives

The aim of this survey was to identify factors associated with patient delay (PD), health system delay (HSD) and total delay (TOTD) in tuberculosis (TB) patients to inform TB control programs.

### Setting

The study was approved by the Italian Ministry of Health and carried out in hospitals of four Italian regions (Calabria, Apulia, Sardinia, and Sicily) from October 2014 to July 2016. Data were obtained using a questionnaire including several domains: socio-demographic data; integration index in Italy; TB risk factors; patient knowledge of TB-associated symptoms and attitudes towards TB; TB related stigma; access to TB diagnosis and treatment and health seeking behaviours; and satisfaction with care.

### Participants

Patients' inclusion criteria were: i) being permanent or temporary resident in one of the above-mentioned Italian regions, and ii) being diagnosed as a new case of pulmonary TB. A total of 344 patients from 30 healthcare centres were invited to participate and 253 patients were included in the analysis. More than one-half (63.6%) were males and 55.7% were non-Italian born.

### Outcome measures

Risk factors for PD, HSD and TOTD in pulmonary TB patients were assessed.

### Results

Median PD, HSD and TOTD were 30, 11 and 45 days, respectively. Factors associated with longer PD were: TB-related stigma, paying for transportation, distance to the health centre, unintentional weight loss, and chest pain; being foreign-born, female and seeking care for the first time at hospital were associated with shorter HSD; on the contrary, prior unspecific treatment was associated with longer HSD.

### Conclusions

Early diagnosis and prompt therapy are key areas in TB control programme. Tackling TB effectively requires addressing all the risk factors that make individuals more vulnerable by the means of public health policy, cooperation and advocacy to ensure that all patients have easy access to care and services and receive high quality healthcare.

### Strengths and limitations of this study

- The study evaluated all factors associated with patient delay, health system delay and total delay in tuberculosis patients in four Italian regions from 2014 to 2016.
- The association of health system delay and total delay with previous unspecific treatment is of concern in the current global epidemiological scenario when antimicrobial resistance is rapidly developing and spreading and a more prudent use of antimicrobials is urgently needed, by limiting the use of empirical antibiotics in patients with respiratory symptoms. Training general practitioners for the early identification of signs and symptoms and prompt referral of suspected cases to tuberculosis diagnosis and treatment health centres is essential.
- The prospective collection of data, the relevant sample size and the adjustment for confounding factors with logistic regression analysis are among the strengths of the present study.
- A selection bias should be considered, especially for foreign-born patients who may have experienced difficulties during the interview, resulting in refusal or in missing data. Also, the low education level of the overall population may have contributed to an information bias. Last, as the onset date of symptoms was self-reported, it may have been affected by recall bias.

### Keywords

Surveillance; public health policy; social epidemiology.

**What is already known on this subject?**

Early diagnosis and prompt treatment of tuberculosis represent key components of any national control programmes, thus the understanding of the determinants of delay are important.

Although tuberculosis has been a low-prevalence disease in Italy, most of the cases occur in vulnerable groups, such as foreign-born individuals, who represents about 50% of total cases.

**What this study adds?**

The study evaluated those factors associated with patient delay, health system delay and total delay in tuberculosis patients in four Italian regions from 2014 to 2016.

The association of health system delay and total delay with previous unspecific treatment is of a particular concern in the current global epidemiological scenario where antimicrobial resistance is rapidly developing and spreading and a more prudent use of antimicrobials is urgently needed, by limiting the use of empirical antibiotics in patients with respiratory symptoms. Training general practitioners for the early identification of signs and symptoms and prompt referral of suspected cases to tuberculosis diagnosis and treatment health centres is essential.

The relevant sample size and the adjustment for confounding factors with logistic regression analysis are among the strengths of the present study

## INTRODUCTION

Early diagnosis and prompt treatment of tuberculosis (TB) disease represent key components of any effective national TB control programme.[1, 2] If adequately implemented and scaled-up, they can contribute to the reduction of *Mycobacterium tuberculosis* transmission and TB elimination by 2050.[3]

In 2015 in Italy, 3.5 thousands TB cases were notified (5.8 cases per 100,000) and the mortality rate was 0.59 deaths per 100,000 residents.[4]

However, delays in diagnosis and treatment of TB frequently occur.[5] Delay in TB diagnosis leads to a more advanced disease, and, thus, poor response to therapies, undesirable clinical *sequelae*, and higher mortality risk. In addition, delay contributes to *M. tuberculosis* transmission within the community.[6, 7] It has been shown that an untreated smear-positive patient can infect, on average, 10 healthy contacts annually.[8] Finally, TB diagnosis delay is associated with higher direct and indirect costs.[9]

Delay may occur at patient or at health system level. Factors contributing to patient delay (PD) can be: socio-demographic, physical, and financial, health literacy, religious-cultural and stigma.[10] Health system delay (HSD)-related factors can be: poor TB knowledge by health providers and poor availability of effective diagnostic tools, number and types of providers encountered before TB diagnosis, patient satisfaction with TB services and waiting time.[10, 11] Thus, understanding and identifying the causes of delay in diagnosis and treatment initiation are critical to strengthen TB control programs. Particularly, the importance of social variables as drivers of epidemics and disease risk has been long recognised. Incorporating the perspectives and methods of social epidemiology into studies of infectious disease, many opportunities arise to control the disease. However, few studies have prioritised social factors as essential to understanding the epidemiology of diseases and for a basis for intervention.[12]

The aim of the present study was to identify all factors associated with PD, HSD and total delay (TOTD) in pulmonary TB (PTB) patients, in four Italian Southern regions, with a focus on social determinants.

## METHODS

### Study design

The present study was conducted in the framework of an Italian project, carried out in hospitals of four Italian regions (Calabria, Apulia, Sardinia, and Sicily) from October 2014 to July 2016, and was approved by the Italian Ministry of Health. Patients' inclusion criteria were: i) being permanent or temporary resident in one of the above-mentioned Italian regions, and ii) being diagnosed as a new case of pulmonary TB.

The project was performed according to the Declaration of Helsinki, participants were fully informed of the purpose of the study, and signed a written informed consent. All data collected were treated confidentially and analysed in aggregated and anonymous form.

### Data collection and definitions

Data were collected by healthcare workers of each participating centre, during a face-to-face interview at the time when patients were diagnosed and/or initiated treatment. A standardised questionnaire available in Italian, English, and French was used, and, if possible, a cultural and linguistic mediator assisted the interview with the task to facilitating communication and understanding, both on linguistic and cultural level.

The questionnaire contained several domains: i) socio-demographic data; ii) integration index (II) in Italy (only for foreign-born patients), computed as described in a previous study;<sup>[13]</sup> iii) TB risk factors; iv) patient knowledge of TB-associated symptoms and attitudes towards TB; v) TB related stigma, measured according to the WHO questionnaire;<sup>[14]</sup> vi) access to TB diagnosis and treatment and health seeking behaviours; vii) dates of onset of symptoms, first contact with healthcare service, TB diagnosis confirmation and treatment initiation; viii) satisfaction with care, assessed by adopting and modifying the USAID questionnaire.<sup>[15]</sup> Definitions of delay were those adopted by USAID.<sup>[10]</sup>

### Statistical analysis

Statistical analyses were performed using the SPSS software (IBM SPSS Statistics for Windows, version 22.0).

The response rate and descriptive statistics were used to characterise the sample using frequencies, means, medians and interquartile ranges (IQRs). The Shapiro-Wilk test was performed to determine whether continuous variables were normally distributed.

1  
2  
3 Variables related to stigma and satisfaction with care domains were recorded on a 5-point Likert scale.[14,  
4  
5 15] Scores were converted as mean percentage score, calculated as follows: (sum of score  
6  
7 obtained/maximum score that could be obtained)  $\times$  100.

8  
9 For TB cases born abroad, the II was calculated based on the score sum of 11 selected variables from the  
10  
11 study questionnaire [13] and then standardised to range from 0 to 10.

12  
13 The two-tailed Chi-squared test was used for the statistical comparison of categorical variables, whereas  
14  
15 quantitative variables were compared using Student's *t* test or the Mann-Whitney U test. The crude odds  
16  
17 ratios (ORs) and the corresponding 95% confidence intervals (95% CIs) were computed. Correlation between  
18  
19 continuous variables was also evaluated using Pearson correlation coefficient.

20  
21 Median values were used as cut-off points to dichotomise quantitative variables. Thus, "longer" delays were  
22  
23 defined if above the median value. The characteristics of patients with longer delays were compared to those  
24  
25 of patients without, using a backward-step selection procedure by multivariable logistic regression analysis.

26  
27 The variables included in the model were those with  $P < 0.1$  on univariate analysis. The adjusted ORs (aOR)  
28  
29 with the respective 95% CIs were reported. A  $p$ -value  $< 0.05$  was considered statistically significant.

## RESULTS

A total of 344 patients from 30 healthcare centres were invited to participate. Overall, 91 (26.5%) refused the interview, and 253 patients were included in the analysis. Patients who refused the interview were older than patients who agreed (46.0 vs. 40.7 years,  $P < 0.023$ ). However, no statistical differences resulted for country of birth and gender. Completion rate for all questions included in the analysis was  $\geq 80\%$ .

Overall, 55.3% of patients were temporary or permanently living in Sicily, 22.1% in Calabria, 17.4% in Apulia, and 5.2% in Sardinia.

Table 1 shows the main characteristics of the study population and comparisons for country of birth and gender. Mean age was 40.7 years (median: 38; IQR 27-53) and 63.6% were males. One hundred forty-one (55.7%) patients were born abroad and they were younger than Italians (mean age: 34.3 years and 48.7 years, respectively;  $P < 0.001$ ).

Stratifying by country of origin, 47.9% of patients came from European countries, and mostly from Romania (82.1%), 28.6% from the African countries, 11.4% from Eastern Mediterranean countries, 9.3% from South-East Asia, 2.1% from Western Pacific countries, and 0.7% from American countries. Foreign-born patients reported higher degree of poverty and literacy: they lived in nursing homes or did not have permanent residency (47.8%), 64.7% were unemployed or occasional workers, and 79.4% were illiterate or had less than 8 years of educational activities ( $P < 0.05$ ).

About one-third suffered of chronic diseases (i.e., diabetes, chronic obstructive pulmonary disease), particularly those born in Italy (39.1%). Current smokers and alcohol users were 27.2% and 6.9%, respectively. Higher percentages of smokers and alcohol users were found among male patients (32.5% and 10.1%). However, no significant differences were observed between Italian and foreign-born patients (Table 1).

**Table 1. Patients' characteristics**

|                         | All<br>% (N) | Italian-born<br>% (N) | Foreign-<br>born<br>% (N) | p*               | Males<br>% (N) | Females<br>% (N) | p*    |
|-------------------------|--------------|-----------------------|---------------------------|------------------|----------------|------------------|-------|
| <b>Age (mean)</b>       | 40.7 (246)   | 48.7 (109)            | 34.3(137)                 | <b>&lt;0.001</b> | 41.0 (157)     | 40.1 (89)        | 0.941 |
| <b>Country of birth</b> |              |                       |                           |                  |                |                  |       |
| Italy                   | 44.3 (112)   | -                     | -                         | -                | 42.2 (68)      | 47.8 (44)        | 0.389 |
| Abroad                  | 55.7 (141)   | -                     | -                         |                  | 57.8 (93)      | 52.2 (48)        |       |
| <b>Gender</b>           |              |                       |                           |                  |                |                  |       |

|                                             |            |             |            |                  |            |             |              |
|---------------------------------------------|------------|-------------|------------|------------------|------------|-------------|--------------|
| Males                                       | 63.6 (161) | -           | -          | -                | -          | -           | -            |
| Females                                     | 36.4 (92)  | -           | -          | -                | -          | -           | -            |
| <b>Education level</b>                      |            |             |            |                  |            |             |              |
| < 8 school years                            | 72.5 (182) | 63.6 (70)   | 79.4 (112) | <b>0.005</b>     | 70.8 (114) | 75.6 (68)   | 0.419        |
| > 8 school years                            | 27.5 (69)  | 36.4 (40)   | 20.6 (29)  |                  | 29.2 (47)  | 24.4 (22)   |              |
| <b>Residence</b>                            |            |             |            |                  |            |             |              |
| Homeless/prison/ Nursing homes              | 20.8 (50)  | 3.7 (4)     | 34.8 (46)  | <b>&lt;0.001</b> | 26.6 (41)  | 10.5 (9)    | <b>0.003</b> |
| Apartment (own or rented)                   | 79.2 (190) | 96.3 (104)  | 65.2 (86)  |                  | 73.4 (113) | 89.5 (77)   |              |
| <b>Employment</b>                           |            |             |            |                  |            |             |              |
| Unemployed or occasional work               | 42.7 (103) | 14.3 (15)   | 64.7 (88)  | <b>&lt;0.001</b> | 47.1 (73)  | 34.9 (30)   | <b>0.019</b> |
| Permanent job                               | 26.6 (64)  | 33.3 (35)   | 21.3 (29)  |                  | 28.4 (44)  | 23.3 (20)   |              |
| Housewife/retired/student                   | 30.7 (74)  | 52.4 (55)   | 14.0 (19)  |                  | 24.5 (38)  | 41.9 (36)   |              |
| <b>Smoking habits</b>                       |            |             |            |                  |            |             |              |
| Current                                     | 27.2 (67)  | 29.9 (32)   | 25.2 (35)  | 0.409            | 32.5 (51)  | 18.0 (16)   | <b>0.014</b> |
| Never/former                                | 72.8 (179) | 70.1 (75)   | 74.8 (104) |                  | 67.5 (106) | 82.0 (73)   |              |
| <b>Alcohol abuse<sup>^</sup></b>            |            |             |            |                  |            |             |              |
| Yes                                         | 6.9 (17)   | 6.3 (7)     | 7.3 (10)   | 0.758            | 10.1 (16)  | 1.1 (1)     | <b>0.007</b> |
| No                                          | 93.1 (231) | 93.7 (104)  | 92.7 (127) |                  | 89.9 (142) | 98.9 (89)   |              |
| <b>Chronic disease</b>                      |            |             |            |                  |            |             |              |
| Yes                                         | 28.3 (71)  | 39.1 (43)   | 19.9 (28)  | <b>0.001</b>     | 31.2 (50)  | 23.1 (21)   | 0.167        |
| No                                          | 71.7 (180) | 60.9 (67)   | 80.1 (113) |                  | 68.8 (110) | 76.9 (70)   |              |
| <b>Stigma (mean)</b>                        | 59.5 (252) | 57.4 (111)  | 61.1 (141) | <b>0.038</b>     | 60.4 (161) | 57.8 (91)   | 0.185        |
| <b>Integration index (mean)<sup>°</sup></b> | 4.4 (141)  | -           | -          | -                | 4.1 (93)   | 5.1 (48)    | <b>0.014</b> |
| <b>Years in Italy (mean)<sup>°</sup></b>    | 7.1 (127)  | -           | -          | -                | 6.6 (85)   | 8.2 (42)    | 0.057        |
| <b>Patient Delay (mean)</b>                 | 60.5 (231) | 58.6 (103)  | 62.0 (128) | <b>0.029</b>     | 53.8 (83)  | 64.2 (148)  | 0.574        |
| <b>Health system delay (mean)</b>           | 44.2 (231) | 68.1 (104)  | 24.7 (127) | <b>&lt;0.001</b> | 41.3 (83)  | 45.9 (148)  | <b>0.004</b> |
| - <b>Diagnostic delay (mean)</b>            | 41.1 (225) | 64.5 (102)  | 21.7 (123) | <b>&lt;0.001</b> | 39.8 (80)  | 41.8 (145)  | <b>0.012</b> |
| - <b>Treatment delay</b>                    | 4.5 (219)  | 5.1 (99)    | 3.9 (120)  | 0.691            | 3.0 (82)   | 5.3 (137)   | 0.397        |
| <b>Total delay</b>                          | 97.5 (248) | 119.2 (110) | 80.2 (138) | 0.296            | 86.8 (91)  | 103.7 (157) | 0.768        |

\*p-values <0.05 are indicated in bold

<sup>^</sup> ≥4 times a week

<sup>°</sup> only in foreign-born patients

Mean PD, HSD and TOTD were 60.5, 44.2, and 97.5 days, respectively (Table 1). Females reported lower mean HSD and Diagnostic Delay (DD) in comparison with men (41.3 vs. 45.9 days; P=0.004 and 39.8 vs. 41.8 days; P=0.012, respectively). Cases born abroad reported higher mean PD (58.6 vs. 62.0 days; P=0.029), but lower mean HSD and DD (68.1 vs. 24.7 days and 64.5 vs. 21.7 days; both P <0.001).

### **Patient knowledge and symptoms recognition**

Foreign-born patients reported lack of knowledge on the disease more often compared with Italian-born (data reported in Supplementary Table S1). Foreign-born patients were less aware that TB is an infectious disease and transmitted by airborne bacteria. They did not know the symptoms most frequently associated with the disease, how TB is diagnosed and cured, and that multi-drug resistant TB may require a longer treatment time to achieve a cure ( $P < 0.05$ ).

Only 3.6% of TB patients reported no symptoms, while 49% of patients reported three or more symptoms. Overall, 65.6% had cough for more than 3 weeks. Sputum with blood was reported by only 13.4% of patients. The main reason for not seeking care was that they perceived the TB symptoms to be mild (58.9%). Foreign-born patients reported more frequently the following symptoms: cough, sputum with blood, weakness, weight loss, and chest pain. Furthermore, women reported tiredness/weakness, weight loss, chest pain, and night sweating less frequently compared with men. Being irregular migrants was the only reason for delayed seeking care in women, while in men other motivations were reported (Table S1).

### **Attitude towards TB and stigma**

A higher percentage of men (38.6%) and foreign-born patients (44.9%) did not inform their families and friends on the disease, compared with women (12.2%) and Italian-born (9.1%) ( $P < 0.001$ ). Detailed results are reported in Supplementary Table S2.

A moderate level of stigma was found (mean: 59.5%; median and IQR: 58.7%, 22.7%-94.7%) in all patients. Compared with Italians, foreign-born patients reported higher overall stigma (61.1% vs. 57.4%,  $P = 0.038$ ). Females reported a higher degree of stigma, in comparison with males, answering to the following questions: “Do you think there is less chances of marriage due to TB diagnosis?” (57% vs. 48.9%;  $P = 0.018$ ) and “Is a girl unable to decide for getting TB treatment?” (44.4% vs. 36.9%;  $P = 0.010$ ).

Positive correlations were detected between degree of stigma and PD ( $r = 0.23$ ;  $P < 0.001$ ) and between degree of stigma and TOTD ( $r = 0.211$ ;  $P = 0.003$ ).

### **Access to TB care centres**

Healthcare-seeking behavior of patients was as follows: General Practitioners (GP) were chosen by 30% of patients, mostly by Italians (46.8%). On the contrary, foreign-born cases were shown to seek more frequently

the hospital care (70.3%). Around 41% of the cases were visited by more than one healthcare provider, particularly for the Italian group (53.2% vs. 31.7%; P= 0.001). Overall, 59% of the cases received an unspecific treatment (mainly antibiotics) before TB diagnosis; this occurred more frequently among cases born in Italy (75.7% vs. 51.6%; P= 0.005).

### Risk analysis of delay

On univariate analysis, factors associated with long PD ( $\geq 30$  days) were TB-related stigma, paying for transportation and distance to get to the healthcare centre, presence of unintentional weight loss, fatigue and chest pain. All these factors, except fatigue remained associated with PD on multivariate analysis (Table 2).

**Table 2. Risk analysis for patient delay (Univariate and logistic regression analysis)**

|                                                                            | PD<br>>30 days<br>% | OR<br>95%CI               | p*               | aOR<br>95%CI               | p*               |
|----------------------------------------------------------------------------|---------------------|---------------------------|------------------|----------------------------|------------------|
| <b>Foreign-born patients</b>                                               |                     |                           |                  |                            |                  |
| No <sup>^</sup>                                                            | 29.1                | 1.00                      | 0.069            | -                          | -                |
| Yes                                                                        | 40.6                | 1.67 (0.96 - 2.89)        |                  |                            |                  |
| <b>Do you know what TB is?</b>                                             |                     |                           | 0.091            | -                          | -                |
| No <sup>^</sup>                                                            | 27.8                | 1.00                      |                  |                            |                  |
| Yes                                                                        | 39.1                | 1.66 (0.92 - 3.00)        |                  |                            |                  |
| <b>Do you know how TB is diagnosed?</b>                                    |                     |                           | 0.051            | -                          | -                |
| No <sup>^</sup>                                                            | 28.7                | 1.00                      |                  |                            |                  |
| Yes                                                                        | 41.3                | 1.75 (0.99 - 3.07)        |                  |                            |                  |
| <b>Stigma</b>                                                              |                     |                           | <b>0.001</b>     |                            | <b>0.034</b>     |
| < median <sup>^</sup>                                                      | 24.8                | <b>1.00</b>               |                  | <b>1.00</b>                |                  |
| > median                                                                   | 46.5                | <b>2.64 (1.51 - 4.61)</b> |                  | <b>2.30 (1.06 - 4.98)</b>  |                  |
| <b>Pay for transportation to reach the health centre</b>                   |                     |                           | <b>&lt;0.001</b> |                            | <b>0.012</b>     |
| No <sup>^</sup>                                                            | 23.5                | <b>1.00</b>               |                  | <b>1.00</b>                |                  |
| Yes                                                                        | 49.4                | <b>3.18 (1.77 - 5.73)</b> |                  | <b>2.66 (1.24 - 5.74)</b>  |                  |
| <b>Did you think you had TB?</b>                                           |                     |                           | 0.090            | -                          | -                |
| No <sup>^</sup>                                                            | 33.8                | 1.00                      |                  |                            |                  |
| Yes                                                                        | 52.4                | 2.15 (0.87 - 5.31)        |                  |                            |                  |
| <b>Was the health centre where you sought care near your living place?</b> |                     |                           | <b>0.018</b>     |                            | <b>0.037</b>     |
| Yes <sup>^</sup>                                                           | 21.9                | 1.00                      |                  | <b>1.00</b>                |                  |
| No                                                                         | 39.2                | 2.30 (1.15 - 4.62)        |                  | <b>2.46 (1.05 - 5.74)</b>  |                  |
| <b>Weight loss</b>                                                         |                     |                           | <b>&lt;0.001</b> |                            | <b>&lt;0.001</b> |
| No <sup>^</sup>                                                            | 22.5                | <b>1.00</b>               |                  | <b>1.00</b>                |                  |
| Yes                                                                        | 56.2                | <b>4.41 (2.48 - 7.83)</b> |                  | <b>4.66 (2.16 - 10.05)</b> |                  |
| <b>Tiredness/weakness</b>                                                  |                     |                           | <b>0.001</b>     | -                          | -                |
| No <sup>^</sup>                                                            | 25.8                | <b>1.00</b>               |                  |                            |                  |
| Yes                                                                        | 45.9                | <b>2.44 (1.40 - 4.25)</b> |                  |                            |                  |
| <b>Chest pain</b>                                                          |                     |                           | <b>0.026</b>     |                            | <b>0.031</b>     |
| No <sup>^</sup>                                                            | 31.4                | <b>1.00</b>               |                  | <b>1.00</b>                |                  |
| Yes                                                                        | 47.5                | <b>1.97 (1.08 - 3.61)</b> |                  | <b>2.67 (1.24 - 6.49)</b>  |                  |
| <b>Do you suffer of chronic diseases?</b>                                  |                     |                           | <b>0.009</b>     | -                          | -                |

|                 |      |                           |  |  |
|-----------------|------|---------------------------|--|--|
| No <sup>^</sup> | 29.6 | <b>1.00</b>               |  |  |
| Yes             | 47.8 | <b>2.17 (1.21 – 3.90)</b> |  |  |

\*p-values <0.05 are indicated in bold

<sup>^</sup> reference category

TB: tuberculosis, PD: patient delay; OR: odd ratio; a: adjusted; CI: confidence interval

Prior unspecific treatment, patients referring to a GP at the first visit, and those visited by multiple providers of different facilities were more likely to report long HSD ( $\geq 11$  days), while females, foreign-born patients, seeking care at hospital level, presence of cough for more than 3 weeks and dizziness were associated with shorter HSD. On multivariate analysis, being foreign-born and female, seeking care at hospital and the presence of dizziness were associated with shorter HSD. Instead, prior unspecific treatment was associated with longer HSD (Table 3).

**Table 3. Risk analysis for health system delay (Univariate and logistic regression analysis)**

|                                                                       | HSD<br>$\geq 11$ days<br>% | OR<br>95%CI               | p*               | aOR<br>95%CI              | p*               |
|-----------------------------------------------------------------------|----------------------------|---------------------------|------------------|---------------------------|------------------|
| <b>Foreign-born patients</b>                                          |                            |                           |                  |                           |                  |
| No <sup>^</sup>                                                       | 61.5                       | <b>1.00</b>               | <b>&lt;0.001</b> | <b>1.00</b>               | <b>0.024</b>     |
| Yes                                                                   | 37.0                       | <b>0.37 (0.22 - 0.63)</b> |                  | <b>0.50 (0.27 - 0.91)</b> |                  |
| <b>Age</b>                                                            |                            |                           | 0.1              | -                         | -                |
| > median                                                              | 43.7                       | 1.00                      |                  |                           |                  |
| $\leq$ median                                                         | 54.6                       | 1.55 (0.92 - 2.62)        |                  |                           |                  |
| <b>Gender</b>                                                         |                            |                           | <b>0.003</b>     |                           | <b>&lt;0.001</b> |
| Male <sup>^</sup>                                                     | 55.4                       | <b>1.00</b>               |                  | <b>1.00</b>               |                  |
| Female                                                                | 34.9                       | <b>0.43 (0.25 - 0.75)</b> |                  | <b>0.28 (0.15 - 0.53)</b> |                  |
| <b>First visit with GP</b>                                            |                            |                           | <b>&lt;0.001</b> | -                         |                  |
| No <sup>^</sup>                                                       | 39.9                       | <b>1.00</b>               |                  |                           |                  |
| Yes                                                                   | 68.7                       | <b>3.30 (1.80 - 6.06)</b> |                  |                           |                  |
| <b>First visit at hospital</b>                                        |                            |                           | <b>&lt;0.001</b> |                           | <b>0.001</b>     |
| No <sup>^</sup>                                                       | 64.6                       | <b>1.00</b>               |                  | <b>1.00</b>               |                  |
| Yes                                                                   | 35.7                       | <b>0.30 (0.17 - 0.53)</b> |                  | <b>0.35 (0.18 - 0.66)</b> |                  |
| <b>After first visit, did you seek treatment from somewhere else?</b> |                            |                           | <b>&lt;0.001</b> | -                         | -                |
| No <sup>^</sup>                                                       | 35.1                       | <b>1.00</b>               |                  |                           |                  |
| Yes                                                                   | 66.7                       | <b>3.70 (2.12 - 6.44)</b> |                  |                           |                  |
| <b>Cough &gt; 3 weeks</b>                                             |                            |                           | <b>0.036</b>     | -                         | -                |
| No <sup>^</sup>                                                       | 57.7                       | <b>1.00</b>               |                  |                           |                  |
| Yes                                                                   | 43.1                       | <b>0.56 (0.32 - 0.97)</b> |                  |                           |                  |
| <b>Dizziness</b>                                                      |                            |                           | <b>0.040</b>     |                           | <b>0.023</b>     |
| No <sup>^</sup>                                                       | 49.8                       | <b>1.00</b>               |                  | <b>1.00</b>               |                  |
| Yes                                                                   | 21.4                       | <b>0.28 (0.15 - 0.53)</b> |                  | <b>0.18 (0.04 - 0.78)</b> |                  |
| <b>Prior unspecific treatment</b>                                     |                            |                           | <b>&lt;0.001</b> |                           | <b>0.012</b>     |

|                                                                                       |      |                           |                  |                           |   |
|---------------------------------------------------------------------------------------|------|---------------------------|------------------|---------------------------|---|
| No <sup>^</sup>                                                                       | 34.1 | <b>1.00</b>               |                  | <b>1.00</b>               |   |
| Yes                                                                                   | 57.1 | <b>2.58 (1.49 - 4.46)</b> |                  | <b>2.25 (1.19 - 4.25)</b> |   |
| <b>Did you have repeated visits with different providers in a different facility?</b> |      |                           | <b>&lt;0.001</b> | -                         | - |
| No <sup>^</sup>                                                                       | 37.3 | <b>1.00</b>               |                  |                           |   |
| Yes                                                                                   | 62.8 | <b>2.84 (1.61 - 5.01)</b> |                  |                           |   |

\*p-values <0.05 are indicated in bold

<sup>^</sup> reference category

GP: general practitioner, HSD: health system delay; OR: odd ratio: a: adjusted: CI: confidence interval

Factors associated with long DD ( $\geq 7$  days), were identical to those associated with HSD, and in addition, having cough for more than 3 weeks was significantly associated with shorter DD (Table S3). No variables were associated with long TD ( $\geq 2$  days).

Good knowledge of TB, paying for transportations, distance to reach the health centre, prior unspecific treatment, and weight loss were associated with long TOTD ( $\geq 45$  days), while patients reporting cough and sputum with blood and who had repeated visits with the same provider showed shorter TOTD. In the logistic regression analysis, all variables except presenting cough and knowledge of the disease were confirmed (Table 4).

**Table 4. Risk analysis for total delay (Univariate and logistic regression analysis)**

|                                                | TOTD<br>$\geq 45$ days<br>% | OR<br>95%CI               | p*           | aOR<br>95%CI              | p*           |
|------------------------------------------------|-----------------------------|---------------------------|--------------|---------------------------|--------------|
| <b>Foreign-born patients</b>                   |                             |                           | 0.091        | -                         | -            |
| No <sup>^</sup>                                | 56.0                        | 1.00                      |              |                           |              |
| Yes                                            | 44.0                        | 0.62 (0.35 – 1.08)        |              |                           |              |
| <b>Do you know what TB is?</b>                 |                             |                           | <b>0.012</b> | -                         | -            |
| No <sup>^</sup>                                | 37.1                        | <b>1.00</b>               |              |                           |              |
| Yes                                            | 55.8                        | <b>2.14 (1.18 – 3.88)</b> |              |                           |              |
| <b>Pay for transportation</b>                  |                             |                           | <b>0.004</b> |                           | <b>0.047</b> |
| No <sup>^</sup>                                | 40.5                        | <b>1.00</b>               |              | <b>1.00</b>               |              |
| Yes                                            | 62.3                        | <b>2.43 (1.32 – 4.46)</b> |              | <b>2.10 (1.01 – 4.35)</b> |              |
| <b>Close distance of the first visit place</b> |                             |                           | <b>0.003</b> |                           | <b>0.006</b> |
| Yes <sup>^</sup>                               | 32.8                        | <b>1.00</b>               |              | <b>1.00</b>               |              |
| No                                             | 56.9                        | <b>2.71 (1.38 – 5.31)</b> |              | <b>3.09 (1.38 – 6.90)</b> |              |
| <b>Cough &gt; 3 weeks</b>                      |                             |                           | <b>0.038</b> | -                         | -            |
| No <sup>^</sup>                                | 60.3                        | <b>1.00</b>               |              |                           |              |
| Yes                                            | 44.5                        | <b>0.53 (0.29– 0.97)</b>  |              |                           |              |
| <b>Sputum with blood</b>                       |                             |                           | <b>0.005</b> |                           | <b>0.001</b> |
| No <sup>^</sup>                                | 53.5                        | <b>1.00</b>               |              | <b>1.00</b>               |              |
| Yes                                            | 25.0                        | <b>0.29 (0.12– 0.72)</b>  |              | <b>0.12 (0.03– 0.43)</b>  |              |
| <b>Weight loss</b>                             |                             |                           | <b>0.004</b> |                           | <b>0.003</b> |

|                                                             |      |                           |              |                           |              |
|-------------------------------------------------------------|------|---------------------------|--------------|---------------------------|--------------|
| No <sup>^</sup>                                             | 41.9 | <b>1.00</b>               |              | <b>1.00</b>               |              |
| Yes                                                         | 63.4 | <b>2.40 (1.32– 4.36)</b>  |              | <b>3.55 (1.56– 8.09)</b>  |              |
| <b>Prior unspecific treatment</b>                           |      |                           | <b>0.003</b> |                           | <b>0.026</b> |
| No <sup>^</sup>                                             | 37.4 | <b>1.00</b>               |              | <b>1.00</b>               |              |
| Yes                                                         | 57.4 | <b>2.26 (1.32 – 3.89)</b> |              | <b>2.55 (1.18– 5.82)</b>  |              |
| <b>Did you have repeated visits with the same provider?</b> |      |                           | <b>0.029</b> |                           | <b>0.012</b> |
| No <sup>^</sup>                                             | 53.6 | <b>1.00</b>               |              | <b>1.00</b>               |              |
| Yes                                                         | 34.1 | <b>0.45 (0.22 – 0.93)</b> |              | <b>0.29 (0.11 – 0.76)</b> |              |

\*p-values <0.05 are indicated in bold

<sup>^</sup> reference category

TB: tuberculosis, TOTD: total delay; OR: odd ratio; a: adjusted; CI: confidence interval

## DISCUSSION

Reducing the time interval between symptoms recognition and TB treatment can decrease mycobacterial transmission, morbidity, and mortality. Although there is no general consensus on what may constitute an acceptable interval between onset of symptoms and initiation of TB treatment,[16] it has been suggested that TB delay could be used as a key indicator of programme performance.[5]

The TB notification rate in the general Italian population has been stable in the last years. However, most of the cases occur in vulnerable groups, who do not recognise the symptoms or have poor access to healthcare services. The two most affected groups are the elderly and foreign-born people. The number of TB cases in foreign-born represents about 50% of total cases in Italy.[17]

According to national estimates, in 2015, the four Italian regions involved in the project accounted for about 21% of the Italian population,[18] and 37% of migrants.[19] In our study, 55.7% patients were foreign-born, and they were younger than Italians. Younger age among foreign-born patients has also been reported in other studies.[20, 21]. Although the TB notification rate is decreasing in Europe, the reduction in individuals of foreign origin is still slower than in native residents. This represents one of the main challenges for TB elimination, especially in those European countries where individuals of foreign-born origin account for a large proportion of TB cases.[22]

The median values for PD, HSD, and TOTD in our study are similar to those reported by other studies conducted in Italy and in other European countries with low-TB incidence. A recent Italian study reported

1  
2  
3 median PD and HSD values of 31 and 15 days, respectively.[20] European studies reported median PD  
4 ranging between 14 and 29 days,[16, 23, 24], HSD between 30 and 33 days,[17, 24] and TOTD between 62  
5 and 63 days, respectively.[16, 25]  
6  
7

8 It is worth noting that some studies evaluated both forms of TB (pulmonary and extra-pulmonary TB), and  
9 tools for data collection and definitions of delay were widely heterogeneous among studies, thus  
10 comparisons should be made with caution. However, values for HSD and TOTD detected in our study are  
11 encouraging, probably due to a higher level of awareness of TB among involved healthcare professionals in  
12 recent years.  
13  
14  
15  
16  
17

18 Similarly to our results, other studies have found that PD was longer than HSD,[20, 26] while others have  
19 found the opposite or no differences.[16, 22, 24, 25]. It is likely that patients who contact the health system  
20 lately could have more severe symptoms facilitating TB suspect and prompt diagnosis,[20] thus the higher  
21 the PD, the lower the HSD, and *vice versa*. [5, 25].  
22  
23  
24  
25

26 In our study, longer PD was associated with high degree of stigma, paying for transportation, distance to  
27 healthcare facility, presence of unintentional weight loss and chest pain. Aside from stigma and chest pain all  
28 others were also detected as risk factors for TOTD. Our results are consistent with the findings of the WHO  
29 Eastern Mediterranean Region study, where stigma, economic factors, and time to reach the health facility  
30 were among the main determinants of delay.[14]  
31  
32  
33  
34  
35

36 TB-related stigma represents a cultural aspect which drives individuals to hide their condition from others,  
37 thus hindering them from seeking care,[27] but evidence shows that stigma barriers may be avoided through  
38 interventions addressed to improve TB-related health literacy.[9]  
39  
40  
41

42 Chest pain and weight loss, together with cough are considered key symptoms for TB screening. Also, a  
43 study found an association between PD >90 days and chest pain.[28] Similarly, weight loss was associated  
44 with longer PD, both in Brazil and in Italy.[20, 28]  
45  
46  
47

48 The association of HSD with birth place might be due to the low TB rate in Italy, thus TB would be less  
49 suspected and investigated in the Italian-born population, or by contrast, being a migrant may point  
50 physicians to a prompt TB diagnosis.[20] This finding is consistent with other studies.[16, 20, 21, 23]  
51  
52  
53  
54  
55  
56  
57  
58  
59  
60

1  
2  
3 Female gender was associated with shorter HSD, in contrast with other studies.[5] In general, female patients  
4 are reported to encounter greater barriers (financial, physical, and health literacy) to receive appropriate  
5 medical care, which reflects longer delay. Further investigations on possible confounders should be  
6 considered.  
7  
8  
9

10 In line with others,[24, 29] a first healthcare contact in hospital, was strongly associated with shorter HSD,  
11 while referring to GP was a risk factor for longer HSD. A combination of several factors, may explain this  
12 result: lack of TB suspicion among primary care providers in low-endemic countries; seeking assistance in  
13 hospital for patients at higher risk of TB (e.g. migrants from endemic countries) and/or with more severe TB  
14 disease who are thus investigated faster; availability and easier access to diagnostic tests and specialists  
15 within the hospital.[23]  
16  
17  
18  
19  
20  
21

22 The association of HSD and TOTD with previous unspecific treatment is in agreement with other results.[20,  
23 23] This is of a particular concern in the current global epidemiological scenario where antimicrobial  
24 resistance is rapidly developing and spreading and a more prudent use of antimicrobials is urgently needed,  
25 by for instance, limiting the use of empirical antibiotics in patients with respiratory symptoms.[23] Training  
26 GP for the early identification of signs and symptoms and prompt referral of suspected cases to TB diagnosis  
27 and treatment health centres is essential.[27]  
28  
29  
30  
31  
32  
33

34 Finally, other factors associated with shorter TOTD were presenting sputum with blood and having visits by  
35 the same provider. Sputum with blood is usually recognised as a late sign of TB, thus patients with severe  
36 symptoms are immediately suspected for TB. Intuitively, having visits with the same provider might reduce  
37 repetition of examinations and misdiagnosis.  
38  
39  
40  
41

42 Our study has some limitations. A selection bias should be considered. The mediator was not often available  
43 in hospitals, thus, foreign-born patients recently arrived in Italy, may have experienced difficulties during the  
44 interview, resulting in refusal or in missing data. Also, the low education level of the overall population may  
45 have contributed to an information bias. As the onset date of symptoms was self-reported, it may have been  
46 affected by recall bias. Another limitation is that data on HIV status and other risk factors (e.g. drug use and  
47 detention status) were not available for the vast majority of patients.  
48  
49  
50  
51  
52  
53  
54  
55  
56  
57  
58  
59  
60

1  
2  
3 The relevant sample size and the adjustment for confounding factors with logistic regression analysis are  
4 among the strengths of the present study.  
5

6  
7 In conclusion, this study detected several modifiable factors associated with longer delay in TB patients, both  
8 attributable to patients and health system service. Interventions designed to empower the general population  
9 and stakeholders, by increasing knowledge and awareness and screening of active TB in migrants upon  
10 arrival are key actions to reduce TB delay and achieve TB control.[30] Strategies should mainly target and  
11 improve TB-related health literacy and access to care among the general population, education of GP, earlier  
12 referral of TB suspects to the hospital, where appropriate investigations for final diagnosis are readily  
13 available, and limiting the use of unspecific treatment in patients with respiratory symptoms.  
14  
15  
16  
17  
18  
19  
20  
21  
22  
23  
24  
25  
26  
27  
28  
29  
30  
31  
32  
33  
34  
35  
36  
37  
38  
39  
40  
41  
42  
43  
44  
45  
46  
47  
48  
49  
50  
51  
52  
53  
54  
55  
56  
57  
58  
59  
60

## ACKNOWLEDGEMENTS

The Authors are grateful to all dedicated staff of the participating hospitals: Silvana Adinolfi, Alessandra Bergamasco, Giulia Bertoli, Gaetano Brindicci, Daniela Castronuovo, Pierpaolo Ciavarella, Vanessa Cozza, Consuelo Geraci, Anna Giannelli, Nicola Grandi, Giuliana Guadagnino, Maria Elena Locatelli, Viviana Marras, Carmen Martino, Alice Medaglia, Maria Cristina Monni, Alessio Pampaloni, Simona Piacenti, Piero Pirina, Rachele Russo, Teresa Scarabaggio, Fabio Sultani, Iulia Adelina Turiac.

## COMPETING INTERESTS

The Authors declare that they have no competing interests.

## ETHICS

All procedures followed were in accordance with the Helsinki Declaration of 1975, as revised in 2008.

Informed consent was obtained from all patients for being included in the study.

## DATA SHARING STATEMENT

No additional data available

## FUNDING SOURCE

The project entitled “*Valutazione dei determinanti di ritardo nell’accesso ai servizi sanitari, nella diagnosi e nel trattamento della tubercolosi polmonare (PTB) in popolazioni vulnerabili. Valutazione dell’impatto sull’epidemiologia locale e sulla prevalenza di resistenza/multiresistenza ai farmaci antitubercolari* - “Assessment of determinants of delay in healthcare access for the diagnosis and treatment of PTB in vulnerable populations. Assessment of the impact on the local epidemiology and on the prevalence of antituberculosis drug resistance/multiresistance” was approved and financially supported by the Italian Ministry of Health (Centro nazionale per la prevenzione e il Controllo delle Malattie, CCM 2013). The funding source had no role in any phase of the development of the current study.

## CONTRIBUTORSHIP

A Agodi, C Mammina, C Nobile, R Prato and G Sotgiu conceived, designed and supervised the study and coordinated regional data collection. A Casuccio and F Vitale coordinated the project after the death of the coordinator C. Mammina. M Barchitta and A Quattrocchi designed the questionnaire and managed data collection at the central level. A Quattrocchi performed the statistical analysis and wrote the first draft of the

1  
2 manuscript. A Agodi, M Barchitta and A Quattrocchi interpreted the results and wrote the advanced version  
3 of the manuscript.  
4

5  
6 All CCM 2013 TB network co-authors supervised and coordinated at the hospital level patients' enrolment  
7 and data collection.  
8  
9

10 All Authors critically reviewed the manuscript and approved the final version.  
11  
12  
13  
14  
15  
16  
17  
18  
19  
20  
21  
22  
23  
24  
25  
26  
27  
28  
29  
30  
31  
32  
33  
34  
35  
36  
37  
38  
39  
40  
41  
42  
43  
44  
45  
46  
47  
48  
49  
50  
51  
52  
53  
54  
55  
56  
57  
58  
59  
60

For peer review only

**REFERENCES**

- 1 Migliori GB, Zellweger JP, Abubakar I, et al. European union standards for tuberculosis care. *Eur Respir J* 2012;39:807-19.
- 2 Tuberculosis Coalition for Technical Assistance. International Standards for Tuberculosis Care (ISTC), second edition. Tuberculosis Coalition for Technical Assistance, The Hague, 2009.
- 3 World Health Organization. The End TB Strategy. Global strategy and targets for tuberculosis prevention, care and control after 2015. WHO; Geneva, 2014. <http://www.who.int/tb/strategy/en/> (accessed 11 Mar 2017).
- 4 World Health Organization. Global tuberculosis report 2016. WHO; Geneva 2014. [http://www.who.int/tb/publications/global\\_report/en/](http://www.who.int/tb/publications/global_report/en/) (accessed 28 Jan 2017).
- 5 Cai J, Wang X, Ma A, et al. Factors associated with patient and provider delays for tuberculosis diagnosis and treatment in Asia: a systematic review and meta-analysis. *PLoS One* 2015;10:e0120088.
- 6 Storla DG, Yimer S, Bjune GA. A systematic review of delay in the diagnosis and treatment of tuberculosis. *BMC Public Health* 2008;8:15.
- 7 Bjune G. Tuberculosis in the 21st century: an emerging pandemic? *Nor Epidemiol* 2005;15(2):133–139.
- 8 Bassili A, Seita A, Baghdadi S, et al. Diagnostic and treatment delay in tuberculosis in 7 countries of the Eastern Mediterranean region. *Infect Dis Clin Pract* 2008;16:23.
- 9 Vassal A. The Costs and Cost-effectiveness of Tuberculosis Control. Amsterdam University press. 2009.
- 10 Yang WT, Gounder CR, Akande T, et al. Barriers and delays in tuberculosis diagnosis and treatment services: does gender matter? *Tuberc Res Treat* 2014;2014:461935.

- 1  
2  
3 11 USAID and TBCARE II. Study Report: Reducing TB Delays: Evaluating the Frequency and Causes of  
4 Delays in Bangladesh and Swaziland. 2014. [http://tbcare2.org/content/reducing-tb-delays-evaluating-](http://tbcare2.org/content/reducing-tb-delays-evaluating-frequency-and-causes-delays-bangladesh-and-swaziland)  
5 [frequency-and-causes-delays-bangladesh-and-swaziland](http://tbcare2.org/content/reducing-tb-delays-evaluating-frequency-and-causes-delays-bangladesh-and-swaziland) (accessed 29 Nov 2016).  
6  
7  
8  
9 12 Noppert GA, Kubale JT, Wilson ML. Analyses of infectious disease patterns and drivers largely lack  
10 insights from social epidemiology: contemporary patterns and future opportunities. *J Epidemiol*  
11 *Community Health* 2017;71:350–355.  
12  
13  
14 13 Barniol J, Niemann S, Louis VR, et al. *Transmission dynamics of pulmonary tuberculosis between*  
15 *autochthonous and immigrant sub-populations. BMC Infect Dis* 2009;9:197.  
16  
17  
18 14 World Health Organization. Diagnostic and treatment delay in tuberculosis. WHO; Geneva, 2006.  
19 <http://applications.emro.who.int/dsaf/dsa710.pdf> (accessed 26 Apr 2014).  
20  
21  
22 15 USAID. Reducing Delays in TB Diagnosis: Data Collection Tools to evaluate the cause and frequency  
23 of TB delays. 2011.  
24 [http://www.challengetb.org/publications/tools/ua/Data\\_Collection\\_Tool\\_TB\\_Patient\\_Delay.pdf](http://www.challengetb.org/publications/tools/ua/Data_Collection_Tool_TB_Patient_Delay.pdf)  
25 (accessed 26 Apr 2014).  
26  
27  
28 16 Saldana L, Abid M, McCarthy N, et al. Factors affecting delay in initiation of treatment of tuberculosis  
29 in the Thames Valley, UK. *Public Health* 2013;127:171-7.  
30  
31  
32 17 Ingrosso L, Vescio F, Giuliani M, et al. Risk factors for tuberculosis in foreign-born people (FBP) in  
33 Italy: a systematic review and meta-analysis. *PLoS One* 2014;9:e94728.  
34  
35  
36 18 Istituto nazionale di statistica - ISTAT (Italian Statistics Institute).  
37 <http://demo.istat.it/pop2015/index1.html> (accessed 25 Jan 2017).  
38  
39  
40 19 Agenzia Nazionale Stampa Associata - ANSA (Associated Press National Agency).  
41 [http://www.ansa.it/sito/notizie/politica/2015/05/07/ansa-scheda-immigrazione-cosi-migranti-distribuiti-](http://www.ansa.it/sito/notizie/politica/2015/05/07/ansa-scheda-immigrazione-cosi-migranti-distribuiti-in-regioni_72f7039b-1ef0-4a0d-9792-e7b803cefd2a.html)  
42 [in-regioni\\_72f7039b-1ef0-4a0d-9792-e7b803cefd2a.html](http://www.ansa.it/sito/notizie/politica/2015/05/07/ansa-scheda-immigrazione-cosi-migranti-distribuiti-in-regioni_72f7039b-1ef0-4a0d-9792-e7b803cefd2a.html) (accessed 25 Jan 2017).  
43  
44  
45  
46  
47  
48  
49  
50  
51  
52  
53  
54  
55  
56  
57  
58  
59  
60

- 1  
2  
3 20 Pezzotti P, Pozzato S, Ferroni E, et al. Delay in diagnosis of pulmonary tuberculosis: A survey in the  
4 Lazio region, Italy. *Epidemiol Biostat Public Health* 2015;12:1-10.  
5  
6  
7 21 Mor Z, Kolb H, Lidji M, et al. Tuberculosis diagnostic delay and therapy outcomes of non-national  
8 migrants in Tel Aviv, 1998-2008. *Euro Surveill* 2013;18(12):pii=20433.  
9  
10  
11  
12 22 Hollo V, Beauté J, Ködmön C, et al. Tuberculosis notification rate decreases faster in residents of  
13 native origin than in residents of foreign origin in the EU/EEA, 2010 to 2015. *Euro Surveill*  
14 2017;22(12):pii=30486.  
15  
16  
17  
18 23 Tattevin P, Che D, Fraisse P, et al. Factors associated with patient and health care system delay in the  
19 diagnosis of tuberculosis in France. *Int J Tuberc Lung Dis* 2012;16:510-5.  
20  
21  
22  
23 24 Sreeramareddy CT, Panduru KV, Menten J, et al. Time delays in diagnosis of pulmonary tuberculosis: a  
24 systematic review of literature. *BMC Infect Dis* 2009;11,9:91.  
25  
26  
27  
28 25 Farah MG, Rygh JH, Steen TW, et al. Patient and health care system delays in the start of tuberculosis  
29 treatment in Norway. *BMC Infect Dis* 2006;6:33.  
30  
31  
32  
33 26 Leutscher P, Madsen G, Erlandsen M, et al. Demographic and clinical characteristics in relation to  
34 patient and health system delays in a tuberculosis low-incidence country. *Scand J Infect Dis*  
35 2012;44:29-36.  
36  
37  
38  
39 27 Li Y, Ehiri J, Tang S, et al. Factors associated with patient, and diagnostic delays in Chinese TB  
40 patients: a systematic review and meta-analysis. *BMC Med* 2013;11:156.  
41  
42  
43  
44 28 Maciel EL, Golub JE, Peres RL, et al. Delay in diagnosis of pulmonary tuberculosis at a primary health  
45 clinic in Vitoria, Brazil. *Int J Tuberc Lung Dis* 2010;14:1403-10.  
46  
47  
48  
49 29 Díez M, Bleda MJ, Alcaide J, et al. Determinants of health system delay among confirmed tuberculosis  
50 cases in Spain. *Eur J Public Health* 2005;15:343-9.  
51  
52  
53  
54  
55  
56  
57  
58  
59  
60

1  
2  
3  
4  
5  
6  
7  
8  
9  
10  
11  
12  
13  
14  
15  
16  
17  
18  
19  
20  
21  
22  
23  
24  
25  
26  
27  
28  
29  
30  
31  
32  
33  
34  
35  
36  
37  
38  
39  
40  
41  
42  
43  
44  
45  
46  
47  
48  
49  
50  
51  
52  
53  
54  
55  
56  
57  
58  
59  
60

30 Pareek M, Greenaway C, Noori T, et al. The impact of migration on tuberculosis epidemiology and control in high-income countries: a review. *BMC Med* 2016;14:48.

For peer review only

## Supplementary material

Table S1. Correctness of patients' knowledge and symptoms recognition stratified for gender and country of birth

| Characteristics                                                                        | Italian-born<br>% (N) | Foreign-born<br>% (N) | p*               | Males<br>% (N) | Females<br>% (N) | p*    |
|----------------------------------------------------------------------------------------|-----------------------|-----------------------|------------------|----------------|------------------|-------|
| <b>Do you know what TB is?</b>                                                         |                       |                       |                  |                |                  |       |
| Yes                                                                                    | 81.2 (91)             | 56.4 (79)             | <b>&lt;0.001</b> | 65.8 (106)     | 70.3 (64)        | 0.465 |
| No                                                                                     | 18.8 (21)             | 43.6 (61)             |                  | 34.2 (55)      | 29.7 (27)        |       |
| <b>Do you think TB is a serious disease?</b>                                           |                       |                       |                  |                |                  |       |
| Yes                                                                                    | 67.9 (76)             | 57.2 (79)             | <b>0.029</b>     | 63.9 (101)     | 58.7 (54)        | 0.309 |
| No                                                                                     | 17.9 (20)             | 14.5 (20)             |                  | 13.3 (21)      | 20.7 (19)        |       |
| Don't know                                                                             | 14.3 (16)             | 28.3 (39)             |                  | 22.8 (36)      | 20.7 (19)        |       |
| <b>What causes TB?</b>                                                                 |                       |                       |                  |                |                  |       |
| Infection                                                                              | 77.5 (86)             | 43.8 (60)             | <b>&lt;0.001</b> | 61.1 (96)      | 54.9 (50)        | 0.491 |
| Punishment                                                                             | 1.8 (2)               | 0.7 (1)               |                  | 1.3 (2)        | 1.1 (1)          |       |
| Unavoidable                                                                            | 0.0 (0)               | 1.5 (2)               |                  | 1.3 (2)        | 0.0 (0)          |       |
| Don't know                                                                             | 20.7 (23)             | 54.0 (74)             |                  | 36.3 (57)      | 44.0 (40)        |       |
| <b>What are the symptoms TB?</b>                                                       |                       |                       |                  |                |                  |       |
| Cough for more than 3 weeks                                                            | 58.0 (65)             | 49.6 (70)             | 0.105            | 54.7 (88)      | 51.1 (47)        | 0.890 |
| Sputum with blood                                                                      | 13.4 (15)             | 9.2 (13)              |                  | 11.2 (18)      | 10.9 (10)        |       |
| Fever                                                                                  | 15.2 (17)             | 14.2 (20)             |                  | 13.7 (22)      | 16.3 (15)        |       |
| Weight loss                                                                            | 2.7 (3)               | 3.5 (5)               |                  | 3.7 (6)        | 2.2 (2)          |       |
| Don't know                                                                             | 10.7 (12)             | 23.4 (33)             |                  | 16.8 (27)      | 19.7 (18)        |       |
| <b>How a person can get TB?</b>                                                        |                       |                       |                  |                |                  |       |
| Through germs present in air droplets expelled in the cough                            | 69.4 (72)             | 37.7 (52)             | <b>&lt;0.001</b> | 55.8 (87)      | 43.0 (37)        | 0.147 |
| Sharing utensils and objects with an infected person                                   | 3.8 (4)               | 7.2 (10)              |                  | 5.8 (9)        | 5.8 (5)          |       |
| Don't know                                                                             | 26.9 (28)             | 55.1 (76)             |                  | 38.5 (60)      | 51.2 (44)        |       |
| <b>How TB is diagnosed?</b>                                                            |                       |                       |                  |                |                  |       |
| Through sputum examination                                                             | 39.0 (39)             | 17.1 (24)             | <b>&lt;0.001</b> | 23.7 (37)      | 31.0 (26)        | 0.409 |
| Through X-ray                                                                          | 32.0 (32)             | 25.7 (36)             |                  | 28.2 (44)      | 28.6 (24)        |       |
| Don't know                                                                             | 29.0 (29)             | 57.1 (80)             |                  | 48.1 (75)      | 40.4 (34)        |       |
| <b>Can TB be cured?</b>                                                                |                       |                       |                  |                |                  |       |
| Yes                                                                                    | 93.6 (103)            | 76.3 (106)            | <b>0.001</b>     | 84.8 (134)     | 82.4 (75)        | 0.858 |
| No                                                                                     | 0.0 (0)               | 2.2 (3)               |                  | 1.3 (2)        | 1.1 (1)          |       |
| Don't know                                                                             | 6.4 (7)               | 21.6 (30)             |                  | 13.9 (22)      | 16.5 (15)        |       |
| <b>Can TB require a longer treatment to be cured as for multidrug resistant forms?</b> |                       |                       |                  |                |                  |       |
| Yes                                                                                    | 51.8 (58)             | 34.5 (48)             | <b>0.016</b>     | 41.0 (66)      | 44.4 (40)        | 0.868 |
| No                                                                                     | 10.7 (12)             | 18.7 (26)             |                  | 15.5 (25)      | 14.4 (13)        |       |
| Don't know                                                                             | 37.5 (42)             | 46.8 (65)             |                  | 43.5 (70)      | 41.2 (37)        |       |
| <b>Which symptoms made you seek healthcare?</b>                                        |                       |                       |                  |                |                  |       |
| Cough for more than 3 weeks                                                            |                       |                       | <b>0.011</b>     |                |                  | 0.861 |
| Yes                                                                                    | 57.1 (64)             | 72.3 (102)            |                  | 65.2 (105)     | 66.3 (61)        |       |
| No                                                                                     | 42.9 (48)             | 27.7 (39)             |                  | 34.8 (56)      | 33.7 (31)        |       |
| Sputum with blood                                                                      |                       |                       |                  |                |                  |       |

|                                                                                                             |             |            |              |             |           |              |
|-------------------------------------------------------------------------------------------------------------|-------------|------------|--------------|-------------|-----------|--------------|
| Yes                                                                                                         | 8.0 (9)     | 17.7 (25)  | <b>0.025</b> | 14.3 (23)   | 12.0 (11) | 0.601        |
| No                                                                                                          | 92.0 (103)  | 82.3 (116) |              | 85.7 (138)  | 88.0 (81) |              |
| <b>Fever</b>                                                                                                |             |            |              |             |           |              |
| Yes                                                                                                         | 50.9 (57)   | 50.4 (71)  | 0.932        | 50.3 (81)   | 51.1 (47) | 0.905        |
| No                                                                                                          | 49.1 (55)   | 49.6 (70)  |              | 49.7 (80)   | 48.9 (45) |              |
| <b>Weight loss</b>                                                                                          |             |            |              |             |           |              |
| Yes                                                                                                         | 28.6 (32)   | 44.7 (63)  | <b>0.009</b> | 44.7 (72)   | 25.0 (23) | <b>0.002</b> |
| No                                                                                                          | 71.4 (80)   | 55.3 (78)  |              | 55.3 (89)   | 75.0 (69) |              |
| <b>Tiredness/weakness</b>                                                                                   |             |            |              |             |           |              |
| Yes                                                                                                         | 38.4 (43)   | 52.5 (74)  | <b>0.026</b> | 50.9 (82)   | 38.0 (35) | <b>0.048</b> |
| No                                                                                                          | 61.1 (69)   | 47.5 (67)  |              | 49.1 (79)   | 62.0 (57) |              |
| <b>Dizziness</b>                                                                                            |             |            |              |             |           |              |
| Yes                                                                                                         | 4.5 (5)     | 6.4 (9)    | 0.507        | 6.8 (11)    | 3.3 (3)   | 0.232        |
| No                                                                                                          | 95.5 (107)  | 93.6 (132) |              | 93.2 (150)  | 96.7 (89) |              |
| <b>Chest pain</b>                                                                                           |             |            |              |             |           |              |
| Yes                                                                                                         | 17.0 (19)   | 30.5 (43)  | <b>0.013</b> | 28.6 (46)   | 17.4 (16) | <b>0.047</b> |
| No                                                                                                          | 83.0 (4393) | 69.5 (98)  |              | 71.4 (115)  | 82.6 (76) |              |
| <b>Night sweat</b>                                                                                          |             |            |              |             |           |              |
| Yes                                                                                                         | 20.5 (23)   | 30.5 (43)  | 0.073        | 31.1 (50)   | 17.4 (16) | <b>0.017</b> |
| No                                                                                                          | 79.5 (89)   | 69.5 (98)  |              | 68.9 (111)  | 82.6 (76) |              |
| <b>Did you think you had TB?</b>                                                                            |             |            |              |             |           |              |
| Yes                                                                                                         | 5.4 (6)     | 11.4 (16)  | 0.090        | 11.8 (19)   | 3.3 (3)   | <b>0.022</b> |
| No                                                                                                          | 94.6 (106)  | 88.6 (124) |              | 88.2 (142)  | 96.7 (88) |              |
| <b>What factors may have made you delay seeking treatment for symptoms that led to the diagnosis of TB?</b> |             |            |              |             |           |              |
| <b>Not aware of symptoms</b>                                                                                |             |            |              |             |           |              |
| Yes                                                                                                         | 38.4 (43)   | 43.3 (61)  | 0.434        | 57.1 (92)   | 62.0 (57) | 0.454        |
| No                                                                                                          | 61.6 (69)   | 56.7 (80)  |              | 42.9 (69)   | 38.0 (35) |              |
| <b>Fear of rejection/ losing my job</b>                                                                     |             |            |              |             |           |              |
| Yes                                                                                                         | 2.7 (3)     | 6.4 (9)    | 0.169        | 5.6 (9)     | 3.3 (3)   | 0.402        |
| No                                                                                                          | 97.3 (109)  | 93.6 (132) |              | 94.4 (152)  | 96.7 (89) |              |
| <b>Expensive</b>                                                                                            |             |            |              |             |           |              |
| Yes                                                                                                         | 0.0 (0)     | 9.2 (13)   | <b>0.001</b> | 5.6 (9)     | 4.3 (4)   | 0.667        |
| No                                                                                                          | 100.0 (112) | 90.8 (128) |              | 94.4 (152)  | 95.7 (88) |              |
| <b>Lack of time</b>                                                                                         |             |            |              |             |           |              |
| Yes                                                                                                         | 5.4 (6)     | 7.1 (10)   | 0.573        | 5.6 (9)     | 7.6 (7)   | 0.526        |
| No                                                                                                          | 94.6 (106)  | 92.9 (131) |              | 94.4 (152)  | 92.4 (85) |              |
| <b>Distance to health centre</b>                                                                            |             |            |              |             |           |              |
| Yes                                                                                                         | 0.9 (1)     | 2.8 (4)    | 0.270        | 2.5 (4)     | 1.1 (1)   | 0.442        |
| No                                                                                                          | 99.1 (111)  | 97.2 (137) |              | 97.5 (157)  | 98.9 (91) |              |
| <b>Lack of transportation</b>                                                                               |             |            |              |             |           |              |
| Yes                                                                                                         | 0.9 (1)     | 0.7 (1)    | 0.870        | 0.0 (0)     | 2.2 (2)   | 0.060        |
| No                                                                                                          | 99.1 (111)  | 99.3 (140) |              | 100.0 (161) | 97.8 (90) |              |
| <b>Previous non-satisfactory experience with the health system</b>                                          |             |            |              |             |           |              |
| Yes                                                                                                         | 1.8 (2)     | 2.1 (3)    | 0.846        | 1.9 (3)     | 2.2 (2)   | 0.864        |
| No                                                                                                          | 98.2 (110)  | 97.9 (138) |              | 98.1 (158)  | 97.8 (90) |              |
| <b>Other (clandestine)</b>                                                                                  |             |            |              |             |           |              |
| Yes                                                                                                         | -           | -          | -            | 9.3 (15)    | 1.1 (1)   | <b>0.010</b> |
| No                                                                                                          | -           | -          |              | 90.7 (146)  | 98.9 (91) |              |

\*p-values <0.05 are indicated in bold

TB: tuberculosis

Table S2. Attitude towards TB stratified for gender and country of birth

|                                                                                                | Italian-born<br>% (N) | Foreign-<br>born<br>% (N) | p*               | Males<br>% (N) | Females<br>% (N) | p*               |
|------------------------------------------------------------------------------------------------|-----------------------|---------------------------|------------------|----------------|------------------|------------------|
| <b>Should people with TB disclose their illness to other people?</b>                           |                       |                           |                  |                |                  |                  |
| Yes                                                                                            | 70.5 (79)             | 47.1 (66)                 | <b>0.001</b>     | 53.1 (85)      | 65.2 (60)        | <b>0.040</b>     |
| No                                                                                             | 8.9 (10)              | 19.3 (27)                 |                  | 18.8 (30)      | 7.6 (7)          |                  |
| Don't know                                                                                     | 20.5 (23)             | 33.6 (47)                 |                  | 28.1 (45)      | 27.2 (25)        |                  |
| <b>Who do you think is more likely to get TB, men or women?</b>                                |                       |                           |                  |                |                  |                  |
| Men                                                                                            | 12.5 (14)             | 15.0 (21)                 | 0.305            | 21.2 (34)      | 1.1 (1)          | <b>&lt;0.001</b> |
| Women                                                                                          | 5.4 (6)               | 10.0 (14)                 |                  | 4.4 (7)        | 14.1 (13)        |                  |
| Don't know                                                                                     | 82.1 (92)             | 75.0 (105)                |                  | 74.9 (119)     | 84.8 (78)        |                  |
| <b>How did you feel when you found out that you had TB?</b>                                    |                       |                           |                  |                |                  |                  |
| Scared                                                                                         | 37.5 (42)             | 45.4 (64)                 | 0.376            | 36.6 (59)      | 51.1 (47)        | 0.164            |
| Depressed                                                                                      | 20.5 (23)             | 14.2 (20)                 |                  | 18.0 (29)      | 15.2 (14)        |                  |
| Didn't believe (denial)                                                                        | 29.5 (33)             | 31.2 (44)                 |                  | 33.5 (54)      | 25.0 (23)        |                  |
| Other                                                                                          | 12.5 (14)             | 9.2 (13)                  |                  | 11.8 (19)      | 8.7 (8)          |                  |
| <b>Did you inform your friends/family that you had TB?</b>                                     |                       |                           |                  |                |                  |                  |
| Yes                                                                                            | 90.9 (100)            | 55.1 (76)                 | <b>&lt;0.001</b> | 61.4 (97)      | 87.8 (79)        | <b>&lt;0.001</b> |
| No                                                                                             | 9.1 (10)              | 44.9 (62)                 |                  | 38.6 (61)      | 12.2 (11)        |                  |
| <b>Have your relationships with your friends/family changed since finding out you have TB?</b> |                       |                           |                  |                |                  |                  |
| Yes                                                                                            | 22.0 (24)             | 14.7 (20)                 | 0.138            | 15.4 (24)      | 22.5 (20)        | 0.165            |
| No                                                                                             | 78.0 (85)             | 85.3 (116)                |                  | 84.6 (132)     | 77.5 (69)        |                  |
| <b>If yes, how?</b>                                                                            |                       |                           |                  |                |                  |                  |
| Improved                                                                                       | 41.7 (10)             | 10.5 (2)                  | <b>0.024</b>     | 26.1 (6)       | 30.0 (6)         | 0.775            |
| Worsened                                                                                       | 58.3 (14)             | 89.5 (17)                 |                  | 73.9 (17)      | 70.0 (14)        |                  |
| <b>Are people with TB discriminated in the community?</b>                                      |                       |                           |                  |                |                  |                  |
| Yes                                                                                            | 46.4 (51)             | 41.0 (57)                 | <b>0.002</b>     | 40.3 (64)      | 48.9 (44)        | 0.386            |
| No                                                                                             | 33.6 (37)             | 19.4 (27)                 |                  | 26.4 (42)      | 24.4 (22)        |                  |
| Don't know                                                                                     | 20.0 (22)             | 39.6 (55)                 |                  | 33.3 (53)      | 26.7 (24)        |                  |
| <b>Among TB patients, are male or female patients more discriminated?</b>                      |                       |                           |                  |                |                  |                  |
| Male                                                                                           | 3.7 (4)               | 9.3 (13)                  | <b>0.027</b>     | 10.1 (16)      | 1.1 (1)          | <b>&lt;0.001</b> |
| Female                                                                                         | 2.85 (3)              | 8.6 (12)                  |                  | 2.5 (4)        | 12.1 (11)        |                  |
| Don't know                                                                                     | 93.6 (102)            | 82.1 (115)                |                  | 87.3 (138)     | 86.8 (79)        |                  |

\*p-values <0.05 are indicated in bold

TB: tuberculosis

**Table S3. Risk analysis for DD (Univariate and logistic regression analysis)**

|                                                                                             | <b>DD<br/>≥7 days<br/>%</b> | <b>DD<br/>&lt;7 days<br/>%</b> | <b>OR<br/>95%CI</b>       | <b>p</b>         | <b>aOR<br/>95%CI</b>      | <b>p</b>         |
|---------------------------------------------------------------------------------------------|-----------------------------|--------------------------------|---------------------------|------------------|---------------------------|------------------|
| <b>Foreign-born patients</b>                                                                |                             |                                |                           | <b>&lt;0.001</b> |                           | <b>0.024</b>     |
| Yes <sup>^</sup>                                                                            | 40.5                        | 68.4                           | <b>1</b>                  |                  | <b>1</b>                  |                  |
| No                                                                                          | 59.5                        | 31.6                           | <b>0.32 (0.18 – 0.54)</b> |                  | <b>0.48 (0.25 – 0.91)</b> |                  |
| <b>Chronic disease</b>                                                                      |                             |                                |                           | 0.061            | -                         | -                |
| Yes <sup>^</sup>                                                                            | 32.1                        | 21.1                           | <b>1</b>                  |                  |                           |                  |
| No                                                                                          | 67.9                        | 78.9                           | <b>1.77 (0.97 – 3.24)</b> |                  |                           |                  |
| <b>Gender</b>                                                                               |                             |                                |                           | <b>0.008</b>     |                           | <b>&lt;0.001</b> |
| Female <sup>^</sup>                                                                         | 27.0                        | 43.9                           | <b>1</b>                  |                  | <b>1</b>                  |                  |
| Male                                                                                        | 73.0                        | 56.1                           | <b>0.47 (0.27 – 0.83)</b> |                  | <b>0.30 (0.15 – 0.58)</b> |                  |
| <b>First visit: General practitioner</b>                                                    |                             |                                |                           | <b>&lt;0.001</b> | -                         | -                |
| Yes <sup>^</sup>                                                                            | 43.1                        | 17.3                           | <b>1</b>                  |                  |                           |                  |
| No                                                                                          | 56.9                        | 82.7                           | <b>3.63 (1.95 – 6.77)</b> |                  |                           |                  |
| <b>First visit: Hospital</b>                                                                |                             |                                |                           | <b>&lt;0.001</b> |                           | <b>0.002</b>     |
| Yes <sup>^</sup>                                                                            | 40.4                        | 70.9                           | <b>1</b>                  |                  | <b>1</b>                  |                  |
| No                                                                                          | 59.6                        | 29.1                           | <b>0.28 (0.16 – 0.49)</b> |                  | <b>0.35 (0.18 – 0.67)</b> |                  |
| <b>After first visit, did you seek treatment from somewhere else?</b>                       |                             |                                |                           | <b>&lt;0.001</b> | -                         | -                |
| Yes <sup>^</sup>                                                                            | 60.0                        | 24.3                           | <b>1</b>                  |                  |                           |                  |
| No                                                                                          | 40.0                        | 75.7                           | <b>4.67 (2.62 – 8.31)</b> |                  |                           |                  |
| <b>Cough more than 3 weeks</b>                                                              |                             |                                |                           | <b>0.035</b>     |                           | <b>0.048</b>     |
| Yes <sup>^</sup>                                                                            | 58.6                        | 71.9                           | <b>1</b>                  |                  | <b>1</b>                  |                  |
| No                                                                                          | 41.4                        | 28.1                           | <b>0.55 (0.32 – 0.96)</b> |                  | <b>0.51 (0.27 – 0.99)</b> |                  |
| <b>Dizziness</b>                                                                            |                             |                                |                           | <b>0.051</b>     |                           | <b>0.039</b>     |
| Yes <sup>^</sup>                                                                            | 2.7                         | 8.8                            | <b>1</b>                  |                  | <b>1</b>                  |                  |
| No                                                                                          | 97.3                        | 91.2                           | <b>0.28 (0.08 – 1.08)</b> |                  | <b>0.21 (0.04 – 0.92)</b> |                  |
| <b>Prior unspecific treatment</b>                                                           |                             |                                |                           | <b>&lt;0.001</b> |                           | <b>0.002</b>     |
| Yes <sup>^</sup>                                                                            | 73.0                        | 46.5                           | <b>1</b>                  |                  | <b>1</b>                  |                  |
| No                                                                                          | 27.0                        | 53.5                           | <b>3.11 (1.78 – 5.43)</b> |                  | <b>2.85 (1.47 – 5.52)</b> |                  |
| <b>With whom did you have repeated visits?: Different providers in a different facility</b> |                             |                                |                           | <b>&lt;0.001</b> | -                         | -                |
| Yes <sup>^</sup>                                                                            | 59.0                        | 30.6                           | <b>1</b>                  |                  |                           |                  |
| No                                                                                          | 41.0                        | 69.4                           | <b>3.26 (1.82 – 5.86)</b> |                  |                           |                  |

\*p-values &lt;0.05 are indicated in bold

<sup>^</sup> reference category

# BMJ Open

## Determinants of patient and health system delay among Italian and foreign-born pulmonary tuberculosis patients: a multicentre cross-sectional study

|                                 |                                                                                                                                                                                                                                                                                                                                                                                                                                                                                                                                                                                                                                                                                                                                                                                                                                                                                                                                                    |
|---------------------------------|----------------------------------------------------------------------------------------------------------------------------------------------------------------------------------------------------------------------------------------------------------------------------------------------------------------------------------------------------------------------------------------------------------------------------------------------------------------------------------------------------------------------------------------------------------------------------------------------------------------------------------------------------------------------------------------------------------------------------------------------------------------------------------------------------------------------------------------------------------------------------------------------------------------------------------------------------|
| Journal:                        | <i>BMJ Open</i>                                                                                                                                                                                                                                                                                                                                                                                                                                                                                                                                                                                                                                                                                                                                                                                                                                                                                                                                    |
| Manuscript ID                   | bmjopen-2017-019673.R1                                                                                                                                                                                                                                                                                                                                                                                                                                                                                                                                                                                                                                                                                                                                                                                                                                                                                                                             |
| Article Type:                   | Research                                                                                                                                                                                                                                                                                                                                                                                                                                                                                                                                                                                                                                                                                                                                                                                                                                                                                                                                           |
| Date Submitted by the Author:   | 17-Jan-2018                                                                                                                                                                                                                                                                                                                                                                                                                                                                                                                                                                                                                                                                                                                                                                                                                                                                                                                                        |
| Complete List of Authors:       | Quattrocchi, Annalisa; University of Catania, GF Ingrassia<br>Barchitta, Martina; University of Catania, GF Ingrassia; LaPoSS, Laboratory of Policies and Social Services, University of Catania, Catania, Italy<br>Nobile, Carmelo; University of Catanzaro "Magna Græcia", Department of Health Sciences<br>Prato, Rosa; University of Foggia, Department of Medical and Surgical Sciences<br>Sotgiu, Giovanni; University of Sassari, Department of Biomedical Sciences, Clinical Epidemiology and Medical Statistics Unit<br>Casuccio, Alessandra; University of Palermo, Department of Sciences for Health Promotion and Mother-Child Care "G. D'Alessandro"<br>Vitale, Francesco; University of Palermo, Department of Sciences for Health Promotion "G. D'Alessandro" – Hygiene section<br>Agodi, Antonella; University of Catania, GF Ingrassia; LaPoSS, Laboratory of Policies and Social Services, University of Catania, Catania, Italy |
| <b>Primary Subject Heading</b>: | Public health                                                                                                                                                                                                                                                                                                                                                                                                                                                                                                                                                                                                                                                                                                                                                                                                                                                                                                                                      |
| Secondary Subject Heading:      | Epidemiology, Health policy, Medical education and training, Patient-centred medicine, Public health                                                                                                                                                                                                                                                                                                                                                                                                                                                                                                                                                                                                                                                                                                                                                                                                                                               |
| Keywords:                       | Surveillance, Public health policy, Social epidemiology, Quality in health care < HEALTH SERVICES ADMINISTRATION & MANAGEMENT, Epidemiology < INFECTIOUS DISEASES, Tuberculosis patients                                                                                                                                                                                                                                                                                                                                                                                                                                                                                                                                                                                                                                                                                                                                                           |
|                                 |                                                                                                                                                                                                                                                                                                                                                                                                                                                                                                                                                                                                                                                                                                                                                                                                                                                                                                                                                    |

SCHOLARONE™  
Manuscripts

1  
2  
3 **Determinants of patient and health system delay among Italian and foreign-born pulmonary**  
4 **tuberculosis patients: a multicentre cross-sectional study**  
5  
6  
7  
8  
9

10 **Authors:** Annalisa Quattrocchi<sup>1</sup>, Martina Barchitta<sup>1,2</sup>, Carmelo Nobile<sup>3</sup>, Rosa Prato<sup>4</sup>, Giovanni Sotgiu<sup>5</sup>,  
11  
12 Alessandra Casuccio<sup>6</sup>, Francesco Vitale<sup>6</sup>, Antonella Agodi<sup>1,2\*</sup>, on behalf of the CCM 2013 TB network  
13

14 To the memory of Professor Caterina Mammina, University of Palermo, First Coordinator of the project  
15  
16  
17

18 **Affiliations:**

19 <sup>1</sup>Department of Medical and Surgical Sciences and Advanced Technologies “GF Ingrassia”, University of  
20 Catania, Italy

21 <sup>2</sup>LaPoSS, Laboratory of Policies and Social Services, University of Catania, Catania, Italy

22 <sup>3</sup>Department of Health Sciences, University of Catanzaro 'Magna Græcia', Catanzaro, Italy

23 <sup>4</sup>Department of Medical and Surgical Sciences, University of Foggia, Foggia, Italy

24 <sup>5</sup>University of Sassari, Department of Biomedical Sciences, Clinical Epidemiology and Medical Statistics  
25 Unit, Sassari, Italy

26 <sup>6</sup>Department of Sciences for Health Promotion and Mother-Child Care "G. D'Alessandro", University of  
27 Palermo, Italy  
28

29 **\*Corresponding author:**

30 Professor Antonella Agodi  
31 Department *GF Ingrassia*  
32 University of Catania, Italy  
33 Via S. Sofia, 87  
34 Comparto 10 Edificio C  
35 95123 Catania Italy  
36 Tel/Fax: +39.095.3782183  
37 Mobile: +39.348.3538195  
38 eMail: [agodia@unict.it](mailto:agodia@unict.it)  
39  
40  
41  
42  
43  
44  
45  
46  
47  
48  
49  
50  
51  
52  
53  
54  
55  
56  
57  
58  
59  
60

## ABSTRACT

### Objectives

The aim of this cross-sectional study was to identify key factors associated with patient delay (PD), health system delay (HSD) and total delay (TOTD) in tuberculosis (TB) patients to inform TB control programs.

### Setting

The study was carried out in four Italian regions (Calabria, Apulia, Sardinia, and Sicily) from October 2014 to July 2016. Data were obtained using a questionnaire including: socio-demographic data, integration index, TB risk factors; patient knowledge and attitudes towards TB, stigma, access to TB care, health seeking behaviours, and satisfaction with care.

### Participants

Patients' inclusion criteria were being diagnosed as a new smear positive pulmonary TB case and living in one of the above-mentioned Italian regions. A total of 344 patients from 30 healthcare centres were invited to participate and 253 patients were included in the analysis (26.5% non-response rate). Overall, 63.6% of patients were males and 55.7% were non-Italian born.

### Outcome measures

Risk factors for PD, HSD and TOTD in TB patients were assessed by multivariable analysis, adjusting for confounding.

### Results

Median PD, HSD and TOTD were 30, 11 and 45 days, respectively. Factors associated with longer PD were: stigma, chest pain, weight loss, paying for transportation and distance to the health centre (the latter three also associated with TOTD). Being foreign-born, female and seeking care for the first time at hospital were associated with shorter HSD, while, prior unspecific treatment was associated with longer HSD and TOTD. Sputum with blood and repeated visits with the same provider showed shorter TOTD.

### Conclusions

The study identifies several determinants of delays associated with patient's behaviours and healthcare qualities. Tackling TB effectively requires addressing key risk factors that make

1  
2 individuals more vulnerable by the means of public health policy, cooperation and advocacy to  
3  
4 ensure that all patients have easy access to care and receive high quality healthcare.  
5  
6

#### 7 **Strengths and limitations of this study**

- 8
- 9 – This is the first multiregional cross-sectional study, in Italy, investigating the association of key
- 10 factors with patient delay, health system delay and total delay in pulmonary tuberculosis patients.
- 11
- 12 – Data were collected by healthcare providers and cultural mediators, using a multilingual standardised
- 13 questionnaire.
- 14
- 15 – The prospective collection of data and the adjustment for confounding factors with logistic
- 16 regression analysis are among the strengths of the present study.
- 17
- 18 – A selection bias should be considered, especially for foreign-born patients who may have
- 19 experienced difficulties during the interview, resulting in refusal or in missing data.
- 20
- 21 – Self-reported dates for onset of symptoms and health care seeking may have been affected by recall
- 22 bias.
- 23
- 24
- 25
- 26
- 27
- 28
- 29
- 30

#### 31 **Keywords**

32 Surveillance; public health policy; social epidemiology; TB patients.  
33  
34  
35  
36  
37  
38  
39  
40  
41  
42  
43  
44  
45  
46  
47  
48  
49  
50  
51  
52  
53  
54  
55  
56  
57  
58  
59  
60

## INTRODUCTION

Early diagnosis and prompt treatment of tuberculosis (TB) disease represent key components of any effective national TB control programme.<sup>1, 2</sup> If adequately implemented and scaled-up, they can contribute to the reduction of *Mycobacterium tuberculosis* transmission and TB elimination by 2050.<sup>3</sup>

However, delays in diagnosis and treatment of TB frequently occur.<sup>4</sup> Long delays lead to a more advanced disease that may result in poor response to therapies, undesirable clinical *sequelae*, and higher mortality risk.<sup>5</sup> Delay also increases the risk of developing anti-TB drug resistance leading to treatment failure.<sup>6</sup> In addition, delay contributes to *M. tuberculosis* transmission within the community.<sup>7,8</sup> It has been shown that an untreated smear-positive patient can infect, on average, 10 healthy contacts annually.<sup>9</sup> Finally, TB diagnosis delay is associated with higher direct and indirect costs.<sup>10</sup>

Delay may occur at patient or at health system level. Factors contributing to patient delay (PD) can be: socio-demographic, physical, and financial, health literacy, religious-cultural and stigma.<sup>11</sup> Health system delay (HSD) related factors can be: poor TB knowledge by health providers and poor availability of effective diagnostic tools, number and types of providers encountered before TB diagnosis, patient satisfaction with TB services and waiting time.<sup>11-12</sup> Thus, understanding and identifying the causes of delay in diagnosis and treatment initiation are critical to strengthen TB control programs. Particularly, the importance of social variables as drivers of epidemics and disease risk has been long recognised. Incorporating the perspectives and methods of social epidemiology into studies of infectious disease, many opportunities arise to control the disease.<sup>13</sup>

However, in Europe, and especially in Italy, few studies have focused on social determinants and TB delays. The aim of the present study was to identify the duration and the key factors related to PD, HSD and total delay (TOTD) in pulmonary TB patients, in four Italian Southern regions, with a focus on social determinants.

## **METHODS**

### **Study design**

The present cross-sectional study was conducted in four Italian regions (Calabria, Apulia, Sardinia, and Sicily) from October 2014 to July 2016, and was approved and financed by the Italian Ministry of Health.

Patients' inclusion criteria were being diagnosed as a new smear positive pulmonary TB case and living in one of the above-mentioned Italian regions. Foreign-born patients were enrolled regardless of their legal migrant status (e.g. refugees, asylum seeker, and illegal migrants). Negative smear, relapse, retreatment and extrapulmonary TB cases were excluded.

The project was performed according to the Declaration of Helsinki, participants were fully informed of the purpose of the study, and signed a written informed consent. All data collected were treated confidentially and analysed in aggregated and anonymous form.

### **Sample Size calculation and Sampling Procedure**

A sample size of 261 was estimated by using single population proportion estimation formula with an assumption of 95% confidence interval, 6% margin of error, and 50.4% proportion of PD (> 30 days).<sup>14</sup>

Furthermore, considering 20% of nonresponse rate, the final sample size was 321. All patients meeting the inclusion criterion, attending the healthcare facility during the study period, were prospectively invited to participate in the study.

### **Data collection and definitions**

Data were collected by healthcare workers of each participating centre, during a face-to-face interview at the time when patients were diagnosed and/or initiated treatment. A standardised questionnaire available in Italian, English, and French was used, and if possible, a cultural and linguistic mediator assisted the interview with the task to facilitate communication and understanding, both on linguistic and cultural level. Operators with adequate background of the health topic, within the specific cultures/languages, supported and assisted patients and healthcare professionals during clinical examinations.

The questionnaire contained several domains: i) socio-demographic data; ii) integration index (II) in Italy (only for foreign-born patients), computed as described in a previous study;<sup>15</sup> iii) TB risk factors; iv) patient knowledge of TB-associated symptoms and attitudes towards TB; v) TB related stigma, measured according

1  
2  
3 to the WHO questionnaire;<sup>16</sup> vi) access to TB diagnosis and treatment and health seeking behaviours; vii)  
4 dates of onset of symptoms, first contact with healthcare service, TB diagnosis confirmation and treatment  
5 initiation; viii) satisfaction with care, assessed by adopting and modifying the USAID questionnaire.<sup>17</sup>  
6  
7

8 PD was defined as the time interval between the onset of symptoms and patient's first contact with any type  
9 of health care service (including hospital and primary health care).<sup>16,17</sup> HSD was defined as the time interval  
10 between the first consultation with a health care provider and the initiation of treatment.<sup>16,17</sup> This can be  
11 subdivided into: diagnostic delay (DD) as the time interval between the presentation to a health care provider  
12 and the date of diagnosis and treatment delay (TD) as the time interval between TB diagnosis and initiation  
13 of anti-TB treatment. Thus, TOTD was defined as the time interval from the onset of symptoms until the  
14 treatment initiation.<sup>17,18</sup>  
15  
16  
17  
18  
19  
20  
21

### 22 **Statistical analysis**

23 Statistical analyses were performed using the SPSS software (IBM SPSS Statistics for Windows, version  
24 22.0).  
25  
26

27 The response rate and descriptive statistics were used to characterise the sample using frequencies, means,  
28 medians and interquartile ranges (IQRs).  
29  
30

31 Poverty was defined in relation to housing circumstances as living in community centres, first aid centres or  
32 prisons. Education level was dichotomised into two categories (high and low), using a cut-off of 8 school  
33 years.  
34  
35  
36  
37

38 Variables related to stigma and satisfaction with care domains were recorded on a 5-point Likert scale.<sup>16,17</sup>  
39 Scores were converted as mean percentage score, calculated as follows: (sum of score obtained/maximum  
40 score that could be obtained) × 100.  
41  
42  
43

44 For TB cases born abroad, the II was calculated based on the score sum of 11 selected variables from the  
45 study questionnaire and then standardised to range from 0 to 10.<sup>15</sup>  
46  
47

48 Longer delays (outcome) were defined according to previous Italian studies. Particularly, long PD was  
49 defined as >30 days, while long HSD and TOTD were defined as > the median value observed in the study  
50 population, for HSD and TOTD, respectively.<sup>14,19</sup>  
51  
52  
53  
54  
55

1  
2  
3 Median values were also used as cut-off points to dichotomise quantitative variables (e.g. age and stigma).  
4  
5 The two-tailed Chi-squared test was used for the statistical comparison of categorical variables, whereas  
6  
7 quantitative variables were compared using Student's *t* test, as the sample was big enough. The Levene's test  
8  
9 was performed to verify the homogeneity of variance across groups.

10  
11 The characteristics of patients with longer delays (all forms) were compared to those of patients without  
12  
13 (comparators) and the crude odds ratios (ORs) and the corresponding 95% confidence intervals (95% CIs)  
14  
15 were computed.

16  
17 All variables with  $P < 0.1$  on univariate analysis were included in the multivariable logistic regression  
18  
19 analysis, using a backward-stepwise selection procedure. The breakpoint for variable removal was set at  
20  
21 0.10. The adjusted ORs (aOR) with the respective 95% CIs were reported. A P-value  $< 0.05$  was considered  
22  
23 statistically significant.

24  
25  
26  
27  
28  
29  
30  
31  
32  
33  
34  
35  
36  
37  
38  
39  
40  
41  
42  
43  
44  
45  
46  
47  
48  
49  
50  
51  
52  
53  
54  
55  
56  
57  
58  
59  
60

er review only

## RESULTS

A total of 344 patients from 30 healthcare centres were invited to participate. Overall, 91 (26.5%) refused the interview, and 253 patients were included in the analysis. Patients who refused the interview were older than patients who agreed (46.0 vs. 40.7 years,  $P = 0.023$ ). However, no statistical differences resulted for country of birth and gender. Completion rate for all questions included in the analysis was  $\geq 80\%$ .

Overall, 55.3% of patients were temporary or permanently living in Sicily, 22.1% in Calabria, 17.4% in Apulia, and 5.2% in Sardinia.

Table 1 shows the main characteristics of the study population and comparisons for country of birth and gender. Mean age was 40.7 years (median: 38; IQR 27-53) and 63.6% were males. One hundred forty-one (55.7%) patients were born abroad and they were younger than Italians (mean age: 34.3 years and 48.7 years, respectively;  $P < 0.001$ ).

Stratifying by country of origin, 47.9% of patients came from European countries, and mostly from Romania (82.1%), 28.6% from the African countries, 11.4% from Eastern Mediterranean countries, 9.3% from South-East Asia, 2.1% from Western Pacific countries, and 0.7% from American countries. Foreign-born patients reported higher degree of poverty and literacy: they lived in nursing homes or did not have permanent residency (47.8%), 64.7% were unemployed or occasional workers, and 79.4% were illiterate or had less than 8 years of educational activities ( $P < 0.05$ ).

About one-third suffered of chronic diseases (i.e. HIV/AIDS, diabetes, chronic obstructive pulmonary disease, disability, renal failure and cardiovascular disease), particularly those born in Italy (39.1%). Current smokers and alcohol users were 27.2% and 6.9%, respectively. Higher percentages of smokers and alcohol users were found among male patients (32.5% and 10.1%). However, no significant differences were observed between Italian and foreign-born patients (Table 1).

### Patient knowledge and symptoms recognition

Foreign-born patients reported lack of knowledge on the disease more often compared with Italian-born (data reported in Supplementary Table S1). Foreign-born patients were less aware that TB is an infectious disease and transmitted by airborne bacteria. They did not know the symptoms most frequently associated with the

1  
2  
3 disease, how TB is diagnosed and cured, and that multi-drug resistant TB may require a longer treatment  
4 time to achieve a cure ( $P < 0.05$ ).

5  
6 Only 3.6% of TB patients reported no symptoms, while 49% of patients reported three or more symptoms.  
7  
8 Overall, 65.6% had cough for more than 3 weeks. Sputum with blood was reported by only 13.4% of  
9 patients. The main reason for not seeking care was that they perceived the TB symptoms to be mild (58.9%).  
10  
11 Foreign-born patients reported more frequently the following symptoms: cough, sputum with blood,  
12 weakness, weight loss, and chest pain. Furthermore, women reported tiredness/weakness, weight loss, chest  
13 pain, and night sweating less frequently compared with men. Being irregular migrants was the only reason  
14 for delayed seeking care in women, while in men other motivations were reported (Table S1).  
15  
16  
17  
18  
19

### 20 **Attitude towards TB and stigma**

21  
22 A higher percentage of men (38.6%) and foreign-born patients (44.9%) did not inform their families and  
23 friends on the disease, compared with women (12.2%) and Italian-born (9.1%) ( $P < 0.001$ ). Detailed results  
24 are reported in Supplementary Table S2.  
25  
26

27  
28 A moderate level of stigma was found (mean: 59.5%; median and IQR: 58.7%, 22.7%-94.7%) in all patients.  
29 Compared with Italians, foreign-born patients reported higher degree of stigma (53.9% vs. 41.4%,  $P = 0.049$ ).  
30  
31

### 32 **Access to TB care centres**

33  
34 Healthcare-seeking behavior of patients was as follows: General Practitioners (GP) were chosen by 30% of  
35 patients, mostly by Italians (46.8%). On the contrary, foreign-born cases were shown to seek more frequently  
36 the hospital care (70.3%). Around 41% of the cases were visited by more than one healthcare provider,  
37 particularly for the Italian group (53.2% vs. 31.7%;  $P = 0.001$ ). Overall, 59% of the cases received an  
38 unspecific treatment (mainly antibiotics) before TB diagnosis; this occurred more frequently among cases  
39 born in Italy (75.7% vs. 51.6%;  $P = 0.005$ ).  
40  
41  
42  
43  
44  
45

### 46 **Risk analysis of delay**

47  
48 Median PD, HSD and TOTD were 30, 11, and 45 days, respectively (Table 1). On univariate analysis,  
49 factors associated with long PD ( $\geq 30$  days) were TB-related stigma, paying for transportation and distance  
50 to get to the healthcare centre, presence of unintentional weight loss, fatigue and chest pain. All these factors,  
51 except fatigue remained associated with PD on multivariate analysis (Table 2).  
52  
53  
54  
55  
56

1  
2  
3 Prior unspecific treatment, patients referring to a GP at the first visit, and those visited by multiple providers  
4 of different facilities were more likely to report long HSD ( $\geq 11$  days), while females, foreign-born patients,  
5 seeking care at hospital level, presence of cough for more than 3 weeks and dizziness were associated with  
6 shorter HSD. On multivariate analysis, being foreign-born and female, seeking care at hospital and the  
7 presence of dizziness were associated with shorter HSD. Instead, prior unspecific treatment was associated  
8 with longer HSD (Table 3).

9  
10  
11  
12  
13  
14 Factors associated with long DD ( $\geq 7$  days), were identical to those associated with HSD, and in addition,  
15 having cough for more than 3 weeks was significantly associated with shorter DD (Table S3). No variables  
16 were associated with long TD ( $\geq 2$  days).

17  
18  
19  
20 Good knowledge of TB, paying for transportations, distance to reach the health centre, prior unspecific  
21 treatment, and weight loss were associated with long TOTD ( $\geq 45$  days), while patients reporting cough and  
22 sputum with blood and who had repeated visits with the same provider showed shorter TOTD. In the logistic  
23 regression analysis, all variables except presenting cough and knowledge of the disease were confirmed  
24 (Table 4).

## DISCUSSION

Reducing the time interval between symptoms recognition and TB treatment can decrease mycobacterial transmission, morbidity, and mortality. Although there is no general consensus on what may constitute an acceptable interval between onset of symptoms and initiation of TB treatment,<sup>20</sup> it has been suggested that TB delay could be used as a key indicator of programme performance.<sup>4</sup>

The TB notification rate in the general Italian population has been stable in the last years.<sup>21</sup>

However, most of the cases occur in vulnerable groups, who do not recognise the symptoms or have poor access to healthcare services. The two most affected groups are the elderly and foreign-born people. The number of TB cases in foreign-born represents about 50% of total cases in Italy.<sup>22</sup>

According to national estimates, in 2015, the four Italian regions involved in the project accounted for about 21% of the Italian population.<sup>23</sup> In our study, 55.7% patients were foreign-born, and they were younger than Italians. Younger age among foreign-born patients has also been reported in other studies.<sup>14,24</sup> Although the TB notification rate is decreasing in Europe, the reduction in individuals of foreign origin is still slower than in native residents. This represents one of the main challenges for TB elimination, especially in those European countries where individuals of foreign-born origin account for a large proportion of TB cases.<sup>25</sup>

In our study, the median values for PD (30 days), HSD (11 days, of which 7 days for DD and 2 days for TD, respectively), and TOTD (45 days) are similar to those reported by other studies conducted in Italy and in other European countries with a low-TB incidence. Particularly, a recent Italian study reported median PD and HSD values of 31 and 15 days, respectively.<sup>14</sup> European studies reported median PDs of 14 days (France),<sup>26</sup> 28 days (Norway),<sup>27</sup> and 29 days (UK).<sup>20</sup> Considering HSD (and its two components), studies reported median values of 15 days (Croatia),<sup>28</sup> 25 days (for DD in France),<sup>26</sup> 30 days (UK),<sup>20</sup> and 33 days (Norway).<sup>27</sup> Median values for TOTD ranged between 62 days (UK),<sup>20</sup> and 63 days (Norway).<sup>27</sup>

However, it is worth noting that some studies evaluated both forms of TB (pulmonary and extra-pulmonary), and tools for data collection and definitions of delay were widely heterogeneous among studies, thus comparisons should be made with caution.

1  
2  
3 Nevertheless, median values detected in our study are encouraging. Indeed, for PD a median value of 30  
4 days has been considered an acceptable value by many authors,<sup>19, 29</sup> although others have suggested values  
5 less than 3 weeks.<sup>30</sup>  
6

7  
8 Regarding HSD, our median value is below the accepted value, which is considered to be 15 days.<sup>29</sup> Low  
9 values of HSD and TOTD might probably due to a higher level of awareness of TB among involved  
10 healthcare professionals in Italy, in recent years.  
11

12  
13 Similarly to our results, other studies have found that PD was longer than HSD,<sup>14, 31</sup> while others have found  
14 the opposite,<sup>26, 27</sup> or no differences.<sup>20</sup> It is likely that patients who contact the health system lately could have  
15 more severe symptoms facilitating TB suspect and prompt diagnosis,<sup>14</sup> thus the higher the PD, the lower the  
16 HSD, and *vice versa*.<sup>4, 27</sup>  
17

18  
19 In our study, longer PD was associated with high degree of stigma, paying for transportation, distance to  
20 healthcare facility, presence of unintentional weight loss and chest pain. Aside from stigma and chest pain all  
21 others were also detected as risk factors for TOTD. Our results are consistent with findings of the WHO  
22 Eastern Mediterranean Region study, where stigma, economic factors, and time to reach the health facility  
23 were among the main determinants of delay.<sup>16</sup>  
24

25  
26 TB-related stigma represents a cultural aspect which drives individuals to hide their condition from others,  
27 thus hindering them from seeking care,<sup>32</sup> but evidence shows that stigma barriers may be avoided through  
28 interventions addressed to improve TB-related health literacy.<sup>11</sup>  
29

30  
31 The reason that chest pain and weight loss were associated with PD is not clear. Although, these symptoms  
32 together with cough are considered key TB symptoms. Other studies retrieved similar results. Chest pain was  
33 found positively associated with longer PD (> 90 days) in a Brazilian study,<sup>33</sup> and with TOTD (>60 days) in  
34 Ethiopia.<sup>29</sup> Similarly, weight loss was associated with longer PD, both in Brazil (>30 days)<sup>33</sup> and in Italy  
35 (>15 days),<sup>14</sup> with PD (>27 days) and TOTD (>50 days) in Uzbekistan,<sup>34</sup> and with HSD (>18 days) in  
36 another Brazilian study.<sup>35</sup> These results could be explained by the fact that patients considered these as  
37 transient symptoms from a general illness, hence, maybe, initiating self-treatment lasting until deterioration  
38 and manifestation of other specific symptoms. Furthermore, timely referral to healthcare facilities for  
39 disabling symptoms may be challenging for migrants due to financial constraints, poor health literacy, and  
40  
41  
42  
43  
44  
45  
46  
47  
48  
49  
50  
51  
52  
53  
54  
55

1  
2  
3 stigma. In addition, a long delay, favours disease progression and therefore symptom appearance. Also, non-  
4  
5 specific symptoms could lead to longer suspicion delays by the clinician.

6  
7 The association of HSD with birth place might be due to the low TB rate in Italy, thus TB would be less  
8  
9 suspected and investigated in the Italian-born population, or by contrast, being a migrant may point  
10  
11 physicians to a prompt TB diagnosis.<sup>14</sup> This finding is consistent with other studies.<sup>14,20</sup>

12  
13 Female gender was associated with shorter HSD, in contrast with other studies.<sup>4</sup> In general, female patients  
14  
15 are reported to encounter greater barriers (financial, physical, and health literacy) to receive appropriate  
16  
17 medical care, which reflects longer delay. Further investigations on possible confounders should be  
18  
19 considered.

20  
21 In line with others,<sup>4, 32, 36, 37</sup> a first healthcare contact in hospital, was strongly associated with shorter HSD,  
22  
23 while referring to GP was a risk factor for longer HSD. A combination of several factors, may explain this  
24  
25 result: lack of TB suspicion among primary care providers in low-endemic countries; seeking assistance in  
26  
27 hospital for patients at higher risk of TB (e.g. migrants from endemic countries) and/or with more severe TB  
28  
29 disease who are thus investigated faster; availability and easier access to diagnostic tests and specialists  
30  
31 within the hospital.<sup>26</sup>

32  
33 The association of HSD and TOTD with previous unspecific treatment is in agreement with other results.<sup>14,26</sup>  
34  
35 This is of a particular concern in the current global epidemiological scenario where antimicrobial resistance  
36  
37 is rapidly developing and spreading and a more prudent use of antimicrobials is urgently needed, by for  
38  
39 instance, limiting the use of empirical antibiotics in patients with respiratory symptoms.<sup>26</sup> Training GP for  
40  
41 the early identification of signs and symptoms and prompt referral of suspected cases to TB diagnosis and  
42  
43 treatment health centres is essential.

44  
45 Finally, other factors associated with shorter TOTD were presenting sputum with blood and having visits by  
46  
47 the same provider. Sputum with blood is usually recognised as a late sign of TB, thus patients with severe  
48  
49 symptoms are immediately suspected for TB. Intuitively, having visits with the same provider might reduce  
50  
51 repetition of examinations and misdiagnosis.

52  
53 Our study has some limitations, some of them specific to the cross-sectional study design. A selection bias  
54  
55 should be considered. In fact, the mediator was not often available in hospitals, thus, foreign-born patients

1  
2  
3 recently arrived in Italy, may have experienced difficulties during the interview, resulting in refusal or in  
4 missing data. Also, the low education level of the overall population may have contributed to an information  
5 bias. Furthermore, as the onset date of symptoms was self-reported, it may have been affected by recall bias.  
6  
7 Another limitation is that data on HIV status and other risk factors (e.g. alcohol and drug use and detention  
8 status) were not available for the vast majority of patients.  
9  
10

11  
12 In the present study, several aspects have been investigating as key factors contributing to delay in TB  
13 patients. However, further studies addressing other components of delay<sup>7, 32, 38</sup> and other stakeholders may be  
14 necessary to understand all factors that are closely associated with delay. Furthermore, in our regression  
15 model we did not take into account for the potential collinearity of explanatory variables, which could  
16 explain complex relationship involving several risk factors at the same time. A possible approach to combine  
17 the relevant variables into summary scores or indexes and assesses the relationship of these with the outcome  
18 of interest have to explored.  
19  
20  
21  
22  
23  
24  
25

26 This is the first multiregional cross-sectional study, conducted in Italy, which investigated the association of  
27 several factors with PD, HSD and TOTD delay in pulmonary TB patients. It provides new evidence which  
28 can be addressed through tailored actions, in order to reduce the burden of TB in Italy. Furthermore, the  
29 prospective collection of data in four Italian regions, using a multilingual standardised questionnaire and the  
30 adjustment for confounding factors with logistic regression analysis are among the strengths of the present  
31 study.  
32  
33  
34  
35  
36  
37

38 In conclusion, this study detected several modifiable factors associated with longer delay in TB patients, both  
39 attributable to patients and health system service. Interventions designed to empower the general population  
40 and stakeholders, by increasing knowledge and awareness and screening of active TB in migrants upon  
41 arrival are key actions to reduce TB delay and achieve TB control.<sup>39</sup> Strategies should mainly target and  
42 improve TB-related health literacy and access to care among the general population, education of GP, earlier  
43 referral of TB suspects to the hospital, where appropriate investigations for final diagnosis are readily  
44 available, and limiting the use of unspecific treatment in patients with respiratory symptoms.  
45  
46  
47  
48  
49  
50  
51  
52  
53  
54  
55  
56

## ACKNOWLEDGEMENTS

The Authors are grateful to all dedicated staff of the participating hospitals: Silvana Adinolfi, Alessandra Bergamasco, Giulia Bertoli, Gaetano Brindicci, Daniela Castronuovo, Pierpaolo Ciavarella, Vanessa Cozza, Consuelo Geraci, Anna Giannelli, Nicola Grandi, Giuliana Guadagnino, Maria Elena Locatelli, Viviana Marras, Carmen Martino, Alice Medaglia, Maria Cristina Monni, Alessio Pampaloni, Simona Piacenti, Piero Pirina, Rachele Russo, Teresa Scarabaggio, Fabio Sultani, Iulia Adelina Turiac.

## COLLABORATORS

CCM 2013 TB network: Alessandro Bisbano, Celestino Bonura, Bruno Cacopardo, Maria Giovanna Cappelli, Antonio Cascio, Francesco Cesario, Paola Di Carlo, Anna Di Taranto, Francesca Fortunato, Antonina Franco, Anna Grimaldi, Carmelo Iacobello, Maria Clara La Rosa, Valentina Mascaro, Andrea Maugeri, Arturo Montineri, Salvatore Nisticò, Cecilia Occhino, Grazia Pantò, Maria Polimeni, Vincenzo Portelli, Graziano Provenzano, Pasquale Quartararo, Francesco Quintieri, Salvatore Requirez, Francesca Savalli, Consiglia Venitucci, Maria Teresa Zorzetto, Rossella Zucco.

All CCM 2013 TB network collaborators supervised and coordinated at the hospital level patients' enrolment and data collection.

## COMPETING INTERESTS

The Authors declare that they have no competing interests.

## ETHICS

All procedures followed were in accordance with the Helsinki Declaration of 1975, as revised in 2008.

Informed consent was obtained from all patients for being included in the study.

## DATA SHARING STATEMENT

No additional data available

## FUNDING SOURCE

The project entitled "*Valutazione dei determinanti di ritardo nell'accesso ai servizi sanitari, nella diagnosi e nel trattamento della tubercolosi polmonare (PTB) in popolazioni vulnerabili. Valutazione dell'impatto sull'epidemiologia locale e sulla prevalenza di resistenza/multiresistenza ai farmaci antitubercolari* -

"Assessment of determinants of delay in healthcare access for the diagnosis and treatment of PTB in

1  
2  
3 vulnerable populations. Assessment of the impact on the local epidemiology and on the prevalence of  
4 antituberculosis drug resistance/multiresistance” was approved and financially supported by the Italian  
5 Ministry of Health (Centro nazionale per la prevenzione e il Controllo delle Malattie, CCM 2013). The  
6 funding source had no role in any phase of the development of the current study.  
7  
8  
9

#### 10 **CONTRIBUTORSHIP**

11  
12 A Agodi, C Nobile, R Prato and G Sotgiu conceived, designed and supervised the study and coordinated  
13 regional data collection. A Casuccio and F Vitale coordinated the project. M Barchitta and A Quattrocchi  
14 designed the questionnaire and managed data collection at the central level. A Quattrocchi performed the  
15 statistical analysis and wrote the first draft of the manuscript. A Agodi, M Barchitta and A Quattrocchi  
16 interpreted the results and wrote the advanced version of the manuscript.  
17  
18  
19  
20  
21

22 All Authors critically reviewed the manuscript and approved the final version.  
23  
24  
25  
26  
27  
28  
29  
30  
31  
32  
33  
34  
35  
36  
37  
38  
39  
40  
41  
42  
43  
44  
45  
46  
47  
48  
49  
50  
51  
52  
53  
54  
55  
56  
57  
58  
59  
60

**REFERENCES**

1. Migliori GB, Zellweger JP, Abubakar I, et al. European union standards for tuberculosis care. *Eur Respir J* 2012;39(4):807-19. doi: 10.1183/09031936.00203811
2. Tuberculosis Coalition for Technical Assistance. International Standards for Tuberculosis Care (ISTC), second edition. The Hague, 2009
3. World Health Organization. The End TB Strategy. Global strategy and targets for tuberculosis prevention, care and control after 2015. WHO; Geneva, 2014. <http://www.who.int/tb/strategy/en/> (accessed 11 Mar 2017)
4. Cai J, Wang X, Ma A, et al. Factors associated with patient and provider delays for tuberculosis diagnosis and treatment in Asia: a systematic review and meta-analysis. *PLoS One* 2015;10(3):e0120088. doi: 10.1371/journal.pone.0120088
5. Gebreegziabher SB, Bjune GA, Yimer SA. Total Delay Is Associated with Unfavorable Treatment Outcome among Pulmonary Tuberculosis Patients in West Gojjam Zone, Northwest Ethiopia: A Prospective Cohort Study. *PLoS One* 2016;11(7):e0159579. doi: 10.1371/journal.pone.0159579
6. Mahato RK, Laohasiriwong W, Vaeteewootacharn K, et al. Major Delays in the Diagnosis and Management of Tuberculosis Patients in Nepal. *J Clin Diagn Res* 2015;9(10):LC05-9. doi: 10.7860/JCDR/2015/16307.6633
7. Storla DG, Yimer S, Bjune GA. A systematic review of delay in the diagnosis and treatment of tuberculosis. *BMC Public Health* 2008;8:15. doi: 10.1186/1471-2458-8-15
8. Bjune G. Tuberculosis in the 21st century: an emerging pandemic? *Nor Epidemiol* 2005;15(2):133–139
9. Bassili A, Seita A, Baghdadi S, et al. Diagnostic and treatment delay in tuberculosis in 7 countries of the Eastern Mediterranean region. *Infect Dis Clin Pract* 2008;16:23.
10. Vassal A. The Costs and Cost-effectiveness of Tuberculosis Control. Amsterdam University press. 2009
11. Yang WT, Gounder CR, Akande T, et al. Barriers and delays in tuberculosis diagnosis and treatment services: does gender matter? *Tuberc Res Treat* 2014;2014:461935. doi: 10.1155/2014/461935
12. USAID and TBCARE II. Study Report. Reducing TB Delays: Evaluating the Frequency and Causes of Delays in Bangladesh and Swaziland. 2014. <http://tbcare2.org/content/reducing-tb-delays-evaluating-frequency-and-causes-delays-bangladesh-and-swaziland> (accessed 29 Nov 2016)
13. Noppert GA, Kubale JT, Wilson ML. Analyses of infectious disease patterns and drivers largely lack insights from social epidemiology: contemporary patterns and future opportunities. *J Epidemiol Community Health* 2017;71(4):350-55. doi: 10.1136/jech-2016-207967
14. Pezzotti P, Pozzato S, Ferroni E, et al. Delay in diagnosis of pulmonary tuberculosis: A survey in the Lazio region, Italy. *Epidemiol Biostat Public Health* 2015;12:1-10.

15. Barniol J, Niemann S, Louis VR, et al. Transmission dynamics of pulmonary tuberculosis between autochthonous and immigrant sub-populations. *BMC Infect Dis* 2009;9:197. doi: 10.1186/1471-2334-9-197
16. World Health Organization. Diagnostic and treatment delay in tuberculosis. WHO; Geneva, 2006. <http://applications.emro.who.int/dsaf/dsa710.pdf> (accessed 26 Apr 2014).
17. USAID. Reducing Delays in TB Diagnosis: Data Collection Tools to evaluate the cause and frequency of TB delays. 2011. [http://www.challenge.tb.org/publications/tools/ua/Data\\_Collection\\_Tool\\_TB\\_Patient\\_Delay.pdf](http://www.challenge.tb.org/publications/tools/ua/Data_Collection_Tool_TB_Patient_Delay.pdf) (accessed 26 Apr 2014)
18. Sreeramareddy CT, Qin ZZ, Satyanarayana S, et al. Delays in diagnosis and treatment of pulmonary tuberculosis in India: a systematic review. *Int J Tuberc Lung Dis* 2014;18(3):255-66. doi: 10.5588/ijtld.13.0585
19. Gagliotti C, Resi D, Moro ML. Delay in the treatment of pulmonary TB in a changing demographic scenario. *Int J Tuberc Lung Dis* 2006;10(3):305-9.
20. Saldana L, Abid M, McCarthy N, et al. Factors affecting delay in initiation of treatment of tuberculosis in the Thames Valley, UK. *Public Health* 2013;127(2):171-7. doi: 10.1016/j.puhe.2012.11.010
21. World Health Organization. Global tuberculosis report 2016. WHO; Geneva 2014. [http://www.who.int/tb/publications/global\\_report/en/](http://www.who.int/tb/publications/global_report/en/) (accessed 28 Jan 2017).
22. Ingrosso L, Vescio F, Giuliani M, et al. Risk factors for tuberculosis in foreign-born people (FBP) in Italy: a systematic review and meta-analysis. *PLoS One* 2014;9(4):e94728. doi: 10.1371/journal.pone.0094728
23. Istituto nazionale di statistica, ISTAT (Italian Statistics Institute). <http://demo.istat.it/pop2015/index1.html> (accessed 25 Jan 2017).
24. Mor Z, Kolb H, Lidji M, et al. Tuberculosis diagnostic delay and therapy outcomes of non-national migrants in Tel Aviv, 1998-2008. *Euro Surveill* 2013;18(12)
25. Hollo V, Beaute J, Kodmon C, et al. Tuberculosis notification rate decreases faster in residents of native origin than in residents of foreign origin in the EU/EEA, 2010 to 2015. *Euro Surveill* 2017;22(12) doi: 10.2807/1560-7917.ES.2017.22.12.30486
26. Tattevin P, Che D, Fraisse P, et al. Factors associated with patient and health care system delay in the diagnosis of tuberculosis in France. *Int J Tuberc Lung Dis* 2012;16(4):510-5. doi: 10.5588/ijtld.11.0420
27. Farah MG, Rygh JH, Steen TW, et al. Patient and health care system delays in the start of tuberculosis treatment in Norway. *BMC Infect Dis* 2006;6:33. doi: 10.1186/1471-2334-6-33
28. Jurcev-Savicevic A, Mulic R, Kozul K, et al. Health system delay in pulmonary tuberculosis treatment in a country with an intermediate burden of tuberculosis: a cross-sectional study. *BMC Public Health* 2013;13:250. doi: 10.1186/1471-2458-13-250

- 1
- 2
- 3 29. Gebreegziabher SB, Bjune GA, Yimer SA. Patients' and health system's delays in the diagnosis and
- 4 treatment of new pulmonary tuberculosis patients in West Gojjam Zone, Northwest Ethiopia: a cross-
- 5 sectional study. *BMC Infect Dis* 2016;16(1):673. doi: 10.1186/s12879-016-1995-z
- 6
- 7 30. Lambert ML, Van der Stuyft P. Delays to tuberculosis treatment: shall we continue to blame the victim?
- 8 *Trop Med Int Health* 2005;10(10):945-6. doi: 10.1111/j.1365-3156.2005.01485.x
- 9
- 10 31. Leutscher P, Madsen G, Erlandsen M, et al. Demographic and clinical characteristics in relation to
- 11 patient and health system delays in a tuberculosis low-incidence country. *Scand J Infect Dis*
- 12 2012;44(1):29-36. doi: 10.3109/00365548.2011.608081
- 13
- 14 32. Li Y, Ehiri J, Tang S, et al. Factors associated with patient, and diagnostic delays in Chinese TB patients:
- 15 a systematic review and meta-analysis. *BMC Med* 2013;11:156. doi: 10.1186/1741-7015-11-156
- 16
- 17 33. Maciel EL, Golub JE, Peres RL, et al. Delay in diagnosis of pulmonary tuberculosis at a primary health
- 18 clinic in Vitoria, Brazil. *Int J Tuberc Lung Dis* 2010;14(11):1403-10.
- 19
- 20 34. Belkina TV, Khojiev DS, Tillyashaykhov MN, et al. Delay in the diagnosis and treatment of pulmonary
- 21 tuberculosis in Uzbekistan: a cross-sectional study. *BMC Infect Dis* 2014;14:624. doi: 10.1186/s12879-
- 22 014-0624-y
- 23
- 24 35. Deponti GN, Silva DR, Coelho AC, et al. Delayed diagnosis and associated factors among new
- 25 pulmonary tuberculosis patients diagnosed at the emergency department of a tertiary care hospital in
- 26 Porto Alegre, South Brazil: a prospective patient recruitment study. *BMC Infect Dis* 2013;13:538. doi:
- 27 10.1186/1471-2334-13-538
- 28
- 29 36. Diez M, Bleda MJ, Alcaide J, et al. Determinants of health system delay among confirmed tuberculosis
- 30 cases in Spain. *Eur J Public Health* 2005;15(4):343-9. doi: 10.1093/eurpub/cki010
- 31
- 32 37. Sreeramareddy CT, Panduru KV, Menten J, et al. Time delays in diagnosis of pulmonary tuberculosis: a
- 33 systematic review of literature. *BMC Infect Dis* 2009;9:91. doi: 10.1186/1471-2334-9-91
- 34
- 35 38. Getnet F, Demissie M, Assefa N, et al. Delay in diagnosis of pulmonary tuberculosis in low-and middle-
- 36 income settings: systematic review and meta-analysis. *BMC Pulm Med* 2017;17(1):202. doi:
- 37 10.1186/s12890-017-0551-y
- 38
- 39 39. Pareek M, Greenaway C, Noori T, et al. The impact of migration on tuberculosis epidemiology and
- 40 control in high-income countries: a review. *BMC Med* 2016;14:48. doi: 10.1186/s12916-016-0595-5
- 41
- 42
- 43
- 44
- 45
- 46
- 47
- 48
- 49
- 50
- 51
- 52
- 53
- 54
- 55
- 56
- 57
- 58
- 59
- 60

1  
2  
3  
4  
5  
6  
7  
8  
9  
10  
11  
12  
13  
14  
15  
16  
17  
18  
19  
20  
21  
22  
23  
24  
25  
26  
27  
28  
29  
30  
31  
32  
33  
34  
35  
36  
37  
38  
39  
40  
41  
42  
43  
44  
45  
46  
47  
48  
49  
50  
51  
52  
53  
54  
55  
56  
57  
58  
59  
60

For peer review only

## Tables

Table 1. Patients' characteristics

|                                             |                                | All<br>% (N) | Italian-born<br>% (N) | Foreign-born<br>% (N) | p*               | Males<br>% (N) | Females<br>% (N) | p*           |
|---------------------------------------------|--------------------------------|--------------|-----------------------|-----------------------|------------------|----------------|------------------|--------------|
| <b>Age (mean)</b>                           |                                | 40.7 (246)   | 48.7 (109)            | 34.3(137)             | <b>&lt;0.001</b> | 41.0 (157)     | 40.1 (89)        | 0.941        |
| <b>Country of birth</b>                     | Italy                          | 44.3 (112)   | -                     | -                     | -                | 42.2 (68)      | 47.8 (44)        | 0.389        |
|                                             | Abroad                         | 55.7 (141)   | -                     | -                     |                  | 57.8 (93)      | 52.2 (48)        |              |
| <b>Gender</b>                               | Males                          | 63.6 (161)   | -                     | -                     | -                | -              | -                | -            |
|                                             | Females                        | 36.4 (92)    | -                     | -                     |                  | -              | -                |              |
| <b>Education level</b>                      | Low                            | 72.5 (182)   | 63.6 (70)             | 79.4 (112)            | <b>0.005</b>     | 70.8 (114)     | 75.6 (68)        | 0.419        |
|                                             | High                           | 27.5 (69)    | 36.4 (40)             | 20.6 (29)             |                  | 29.2 (47)      | 24.4 (22)        |              |
| <b>Residence</b>                            | Homeless/prison/ Nursing homes | 20.8 (50)    | 3.7 (4)               | 34.8 (46)             | <b>&lt;0.001</b> | 26.6 (41)      | 10.5 (9)         | <b>0.003</b> |
|                                             | Apartment (own or rented)      | 79.2 (190)   | 96.3 (104)            | 65.2 (86)             |                  | 73.4 (113)     | 89.5 (77)        |              |
| <b>Employment</b>                           | Unemployed or occasional work  | 42.7 (103)   | 14.3 (15)             | 64.7 (88)             | <b>&lt;0.001</b> | 47.1 (73)      | 34.9 (30)        | <b>0.019</b> |
|                                             | Permanent job                  | 26.6 (64)    | 33.3 (35)             | 21.3 (29)             |                  | 28.4 (44)      | 23.3 (20)        |              |
|                                             | Housewife/retired/student      | 30.7 (74)    | 52.4 (55)             | 14.0 (19)             |                  | 24.5 (38)      | 41.9 (36)        |              |
| <b>Smoking habits</b>                       | Current                        | 27.2 (67)    | 29.9 (32)             | 25.2 (35)             | 0.409            | 32.5 (51)      | 18.0 (16)        | <b>0.014</b> |
|                                             | Never/former                   | 72.8 (179)   | 70.1 (75)             | 74.8 (104)            |                  | 67.5 (106)     | 82.0 (73)        |              |
| <b>Alcohol abuse<sup>^</sup></b>            | Yes                            | 6.9 (17)     | 6.3 (7)               | 7.3 (10)              | 0.758            | 10.1 (16)      | 1.1 (1)          | <b>0.007</b> |
|                                             | No                             | 93.1 (231)   | 93.7 (104)            | 92.7 (127)            |                  | 89.9 (142)     | 98.9 (89)        |              |
| <b>Chronic diseases<sup>†</sup></b>         | Yes                            | 28.3 (71)    | 39.1 (43)             | 19.9 (28)             | <b>0.001</b>     | 31.2 (50)      | 23.1 (21)        | 0.167        |
|                                             | No                             | 71.7 (180)   | 60.9 (67)             | 80.1 (113)            |                  | 68.8 (110)     | 76.9 (70)        |              |
| <b>Stigma</b>                               | >median                        | 48.4 (122)   | 41.4 (46)             | 53.9 (76)             | <b>0.049</b>     | 51.6 (83)      | 42.9 (39)        | 0.185        |
|                                             | ≤median                        | 51.6 (130)   | 58.6 (65)             | 46.1 (65)             |                  | 48.4 (78)      | 57.1 (52)        |              |
| <b>Integration index (mean)<sup>°</sup></b> |                                | 4.4 (141)    | -                     | -                     | -                | 4.1 (93)       | 5.1 (48)         | <b>0.008</b> |
| <b>Years in Italy (mean)<sup>°</sup></b>    |                                | 7.1 (127)    | -                     | -                     | -                | 6.6 (85)       | 8.2 (42)         | 0.242        |
| <b>Patient Delay</b>                        | Median (IQR)                   | 30 (8-60)    | 15 (7-60)             | 30 (14-60)            | -                | 30 (10-60)     | 28 (7-60)        | -            |
|                                             | (>30 days)                     | 64.5 (149)   | 29.1 (30)             | 40.6 (52)             | 0.069            | 37.2 (55)      | 32.5 (27)        | 0.480        |
| <b>Health system delay</b>                  | Median (IQR)                   | 11 (5-33)    | 21 (7.25-61)          | 8 (4-22)              | -                | 14.5 (6-37)    | 8 (4-31)         | -            |
|                                             | (>11 days)                     | 48.1 (111)   | 61.5 (64)             | 37.0 (47)             | <b>&lt;0.001</b> | 55.4 (82)      | 34.9 (29)        | <b>0.008</b> |
| <b>Diagnostic delay</b>                     | Median (IQR)                   | 7 (3-30)     | 15 (4.75-60)          | 7 (3-15)              | -                | 14 (4-30)      | 6 (3-28)         | -            |
|                                             | (>7 days)                      | 49.3 (111)   | 64.7 (66)             | 36.6 (45)             | <b>&lt;0.001</b> | 55.9 (81)      | 37.5 (30)        | <b>0.008</b> |

|                        |              |             |             |            |       |            |             |       |
|------------------------|--------------|-------------|-------------|------------|-------|------------|-------------|-------|
| <b>Treatment delay</b> | Median (IQR) | 2 (1-4)     | 2 (1-4)     | 2 (1-4)    | -     | 2 (1-5)    | 2 (1-4)     | -     |
|                        | (>2 days)    | 38.4 (84)   | 38.4 (38)   | 38.3 (46)  | 0.994 | 40.9 (56)  | 34.1 (28)   | 0.322 |
| <b>Total delay</b>     | Median (IQR) | 45 (25-121) | 53 (25-123) | 40 (25-97) | -     | 47 (26-99) | 41 (16-120) | -     |
|                        | (>45 days)   | 49.5 (97)   | 56.0 (50)   | 44.0 (47)  | 0.091 | 66.0 (64)  | 34.0 (33)   | 0.525 |

\*p-values <0.05 are indicated in bold

^ ≥4 times a week

° only in foreign-born patients

† HIV/AIDS, diabetes, chronic obstructive pulmonary disease, disability, renal failure, cardiovascular disease

For peer review only

**Table 2. Risk analysis for patient delay (Univariate and logistic regression analysis)**

|                                                                            | PD<br>>30 days<br>% | OR<br>95%CI               | p*               | aOR<br>95%CI               | p*               |
|----------------------------------------------------------------------------|---------------------|---------------------------|------------------|----------------------------|------------------|
| <b>Foreign-born patients</b>                                               |                     |                           |                  |                            |                  |
| No <sup>^</sup>                                                            | 29.1                | 1.00                      | 0.069            | -                          | -                |
| Yes                                                                        | 40.6                | 1.67 (0.96 - 2.89)        |                  |                            |                  |
| <b>Do you know what TB is?</b>                                             |                     |                           | 0.091            | -                          | -                |
| No <sup>^</sup>                                                            | 27.8                | 1.00                      |                  |                            |                  |
| Yes                                                                        | 39.1                | 1.66 (0.92 - 3.00)        |                  |                            |                  |
| <b>Do you know how TB is diagnosed?</b>                                    |                     |                           | 0.051            | -                          | -                |
| No <sup>^</sup>                                                            | 28.7                | 1.00                      |                  |                            |                  |
| Yes                                                                        | 41.3                | 1.75 (0.99 - 3.07)        |                  |                            |                  |
| <b>Stigma</b>                                                              |                     |                           | <b>0.001</b>     |                            | <b>0.034</b>     |
| < median <sup>^</sup>                                                      | 24.8                | <b>1.00</b>               |                  | <b>1.00</b>                |                  |
| > median                                                                   | 46.5                | <b>2.64 (1.51 - 4.61)</b> |                  | <b>2.30 (1.06 - 4.98)</b>  |                  |
| <b>Pay for transportation to reach the health centre</b>                   |                     |                           | <b>&lt;0.001</b> |                            | <b>0.012</b>     |
| No <sup>^</sup>                                                            | 23.5                | <b>1.00</b>               |                  | <b>1.00</b>                |                  |
| Yes                                                                        | 49.4                | <b>3.18 (1.77 - 5.73)</b> |                  | <b>2.66 (1.24 - 5.74)</b>  |                  |
| <b>Did you think you had TB?</b>                                           |                     |                           | 0.090            | -                          | -                |
| No <sup>^</sup>                                                            | 33.8                | 1.00                      |                  |                            |                  |
| Yes                                                                        | 52.4                | 2.15 (0.87 - 5.31)        |                  |                            |                  |
| <b>Was the health centre where you sought care near your living place?</b> |                     |                           | <b>0.018</b>     |                            | <b>0.037</b>     |
| Yes <sup>^</sup>                                                           | 21.9                | 1.00                      |                  | <b>1.00</b>                |                  |
| No                                                                         | 39.2                | 2.30 (1.15 - 4.62)        |                  | <b>2.46 (1.05 - 5.74)</b>  |                  |
| <b>Weight loss</b>                                                         |                     |                           | <b>&lt;0.001</b> |                            | <b>&lt;0.001</b> |
| No <sup>^</sup>                                                            | 22.5                | <b>1.00</b>               |                  | <b>1.00</b>                |                  |
| Yes                                                                        | 56.2                | <b>4.41 (2.48 - 7.83)</b> |                  | <b>4.66 (2.16 - 10.05)</b> |                  |
| <b>Tiredness/weakness</b>                                                  |                     |                           | <b>0.001</b>     | -                          | -                |
| No <sup>^</sup>                                                            | 25.8                | <b>1.00</b>               |                  |                            |                  |
| Yes                                                                        | 45.9                | <b>2.44 (1.40 - 4.25)</b> |                  |                            |                  |
| <b>Chest pain</b>                                                          |                     |                           | <b>0.026</b>     |                            | <b>0.031</b>     |
| No <sup>^</sup>                                                            | 31.4                | <b>1.00</b>               |                  | <b>1.00</b>                |                  |
| Yes                                                                        | 47.5                | <b>1.97 (1.08 - 3.61)</b> |                  | <b>2.67 (1.24 - 6.49)</b>  |                  |
| <b>Chronic diseases</b>                                                    |                     |                           | <b>0.009</b>     | -                          | -                |
| No <sup>^</sup>                                                            | 29.6                | <b>1.00</b>               |                  |                            |                  |
| Yes                                                                        | 47.8                | <b>2.17 (1.21 - 3.90)</b> |                  |                            |                  |

\*p-values <0.05 are indicated in bold

<sup>^</sup> reference category

PD: patient delay; OR: odd ratio; a: adjusted; CI: confidence interval; TB: tuberculosis

**Table 3. Risk analysis for health system delay (Univariate and logistic regression analysis)**

|                                                                                       | HSD<br>>11 days<br>% | OR<br>95%CI               | p*               | aOR<br>95%CI              | p*               |
|---------------------------------------------------------------------------------------|----------------------|---------------------------|------------------|---------------------------|------------------|
| <b>Foreign-born patients</b>                                                          |                      |                           |                  |                           |                  |
| No <sup>^</sup>                                                                       | 61.5                 | <b>1.00</b>               | <b>&lt;0.001</b> | <b>1.00</b>               | <b>0.024</b>     |
| Yes                                                                                   | 37.0                 | <b>0.37 (0.22 - 0.63)</b> |                  | <b>0.50 (0.27 - 0.91)</b> |                  |
| <b>Age</b>                                                                            |                      |                           | 0.1              | -                         | -                |
| > median                                                                              | 43.7                 | 1.00                      |                  |                           |                  |
| ≤median                                                                               | 54.6                 | 1.55 (0.92 - 2.62)        |                  |                           |                  |
| <b>Gender</b>                                                                         |                      |                           | <b>0.003</b>     | <b>1.00</b>               | <b>&lt;0.001</b> |
| Male <sup>^</sup>                                                                     | 55.4                 | <b>1.00</b>               |                  | <b>1.00</b>               |                  |
| Female                                                                                | 34.9                 | <b>0.43 (0.25 - 0.75)</b> |                  | <b>0.28 (0.15 - 0.53)</b> |                  |
| <b>First visit with GP</b>                                                            |                      |                           | <b>&lt;0.001</b> | -                         |                  |
| No <sup>^</sup>                                                                       | 39.9                 | <b>1.00</b>               |                  |                           |                  |
| Yes                                                                                   | 68.7                 | <b>3.30 (1.80 - 6.06)</b> |                  |                           |                  |
| <b>First visit at hospital</b>                                                        |                      |                           | <b>&lt;0.001</b> | <b>1.00</b>               | <b>0.001</b>     |
| No <sup>^</sup>                                                                       | 64.6                 | <b>1.00</b>               |                  | <b>1.00</b>               |                  |
| Yes                                                                                   | 35.7                 | <b>0.30 (0.17 - 0.53)</b> |                  | <b>0.35 (0.18 - 0.66)</b> |                  |
| <b>After first visit, did you seek treatment from somewhere else?</b>                 |                      |                           | <b>&lt;0.001</b> | -                         | -                |
| No <sup>^</sup>                                                                       | 35.1                 | <b>1.00</b>               |                  |                           |                  |
| Yes                                                                                   | 66.7                 | <b>3.70 (2.12 - 6.44)</b> |                  |                           |                  |
| <b>Cough &gt; 3 weeks</b>                                                             |                      |                           | <b>0.036</b>     | -                         | -                |
| No <sup>^</sup>                                                                       | 57.7                 | <b>1.00</b>               |                  |                           |                  |
| Yes                                                                                   | 43.1                 | <b>0.56 (0.32 - 0.97)</b> |                  |                           |                  |
| <b>Dizziness</b>                                                                      |                      |                           | <b>0.040</b>     | <b>1.00</b>               | <b>0.023</b>     |
| No <sup>^</sup>                                                                       | 49.8                 | <b>1.00</b>               |                  | <b>1.00</b>               |                  |
| Yes                                                                                   | 21.4                 | <b>0.28 (0.75 - 1.01)</b> |                  | <b>0.18 (0.04 - 0.78)</b> |                  |
| <b>Prior unspecific treatment</b>                                                     |                      |                           | <b>&lt;0.001</b> | <b>1.00</b>               | <b>0.012</b>     |
| No <sup>^</sup>                                                                       | 34.1                 | <b>1.00</b>               |                  | <b>1.00</b>               |                  |
| Yes                                                                                   | 57.1                 | <b>2.58 (1.49 - 4.46)</b> |                  | <b>2.25 (1.19 - 4.25)</b> |                  |
| <b>Did you have repeated visits with different providers in a different facility?</b> |                      |                           | <b>&lt;0.001</b> | -                         | -                |
| No <sup>^</sup>                                                                       | 37.3                 | <b>1.00</b>               |                  |                           |                  |
| Yes                                                                                   | 62.8                 | <b>2.84 (1.61 - 5.01)</b> |                  |                           |                  |

\*p-values <0.05 are indicated in bold

<sup>^</sup> reference category

HSD: health system delay; OR: odd ratio; a: adjusted; CI: confidence interval; GP: general practitioner;

**Table 4. Risk analysis for total delay (Univariate and logistic regression analysis)**

|                                                             | <b>TOTD<br/>&gt;45 days<br/>%</b> | <b>OR<br/>95%CI</b>       | <b>p*</b>    | <b>aOR<br/>95%CI</b>      | <b>p*</b>    |
|-------------------------------------------------------------|-----------------------------------|---------------------------|--------------|---------------------------|--------------|
| <b>Foreign-born patients</b>                                |                                   |                           |              |                           |              |
| No <sup>^</sup>                                             | 56.0                              | 1.00                      | 0.091        | -                         | -            |
| Yes                                                         | 44.0                              | 0.62 (0.35 – 1.08)        |              |                           |              |
| <b>Do you know what TB is?</b>                              |                                   |                           |              |                           |              |
| No <sup>^</sup>                                             | 37.1                              | 1.00                      | <b>0.012</b> | -                         | -            |
| Yes                                                         | 55.8                              | <b>2.14 (1.18 – 3.88)</b> |              |                           |              |
| <b>Pay for transportation</b>                               |                                   |                           |              |                           |              |
| No <sup>^</sup>                                             | 40.5                              | 1.00                      | <b>0.004</b> | 1.00                      | <b>0.047</b> |
| Yes                                                         | 62.3                              | <b>2.43 (1.32 – 4.46)</b> |              | <b>2.10 (1.01 – 4.35)</b> |              |
| <b>Close distance of the first visit place</b>              |                                   |                           |              |                           |              |
| Yes <sup>^</sup>                                            | 32.8                              | 1.00                      | <b>0.003</b> | 1.00                      | <b>0.006</b> |
| No                                                          | 56.9                              | <b>2.71 (1.38 – 5.31)</b> |              | <b>3.09 (1.38 – 6.90)</b> |              |
| <b>Cough &gt; 3 weeks</b>                                   |                                   |                           |              |                           |              |
| No <sup>^</sup>                                             | 60.3                              | 1.00                      | <b>0.038</b> | -                         | -            |
| Yes                                                         | 44.5                              | <b>0.53 (0.29– 0.97)</b>  |              |                           |              |
| <b>Sputum with blood</b>                                    |                                   |                           |              |                           |              |
| No <sup>^</sup>                                             | 53.5                              | 1.00                      | <b>0.005</b> | 1.00                      | <b>0.001</b> |
| Yes                                                         | 25.0                              | <b>0.29 (0.12– 0.72)</b>  |              | <b>0.12 (0.03– 0.43)</b>  |              |
| <b>Weight loss</b>                                          |                                   |                           |              |                           |              |
| No <sup>^</sup>                                             | 41.9                              | 1.00                      | <b>0.004</b> | 1.00                      | <b>0.003</b> |
| Yes                                                         | 63.4                              | <b>2.40 (1.32– 4.36)</b>  |              | <b>3.55 (1.56– 8.09)</b>  |              |
| <b>Prior unspecific treatment</b>                           |                                   |                           |              |                           |              |
| No <sup>^</sup>                                             | 37.4                              | 1.00                      | <b>0.003</b> | 1.00                      | <b>0.026</b> |
| Yes                                                         | 57.4                              | <b>2.26 (1.32 – 3.89)</b> |              | <b>2.55 (1.18– 5.82)</b>  |              |
| <b>Did you have repeated visits with the same provider?</b> |                                   |                           |              |                           |              |
| No <sup>^</sup>                                             | 53.6                              | 1.00                      | <b>0.029</b> | 1.00                      | <b>0.012</b> |
| Yes                                                         | 34.1                              | <b>0.45 (0.22 – 0.93)</b> |              | <b>0.29 (0.11 – 0.76)</b> |              |

\*p-values <0.05 are indicated in bold

<sup>^</sup> reference category

TOTD: total delay; OR: odd ratio; a: adjusted; CI: confidence interval; TB: tuberculosis

## Supplementary material

Table S1. Correctness of patients' knowledge and symptoms recognition stratified for gender and country of birth

| Characteristics                                             | Italian-born % (N) | Foreign-born % (N) | p*               | Males % (N) | Females % (N) | p*    |
|-------------------------------------------------------------|--------------------|--------------------|------------------|-------------|---------------|-------|
| <b>Do you know what TB is?</b>                              |                    |                    |                  |             |               |       |
| Yes                                                         | 81.2 (91)          | 56.4 (79)          | <b>&lt;0.001</b> | 65.8 (106)  | 70.3 (64)     | 0.465 |
| No                                                          | 18.8 (21)          | 43.6 (61)          |                  | 34.2 (55)   | 29.7 (27)     |       |
| <b>Do you think TB is a serious disease?</b>                |                    |                    |                  |             |               |       |
| Yes                                                         | 67.9 (76)          | 57.2 (79)          | <b>0.029</b>     | 63.9 (101)  | 58.7 (54)     | 0.309 |
| No                                                          | 17.9 (20)          | 14.5 (20)          |                  | 13.3 (21)   | 20.7 (19)     |       |
| Don't know                                                  | 14.3 (16)          | 28.3 (39)          |                  | 22.8 (36)   | 20.7 (19)     |       |
| <b>What causes TB?</b>                                      |                    |                    |                  |             |               |       |
| Infection                                                   | 77.5 (86)          | 43.8 (60)          | <b>&lt;0.001</b> | 61.1 (96)   | 54.9 (50)     | 0.491 |
| Punishment                                                  | 1.8 (2)            | 0.7 (1)            |                  | 1.3 (2)     | 1.1 (1)       |       |
| Unavoidable                                                 | 0.0 (0)            | 1.5 (2)            |                  | 1.3 (2)     | 0.0 (0)       |       |
| Don't know                                                  | 20.7 (23)          | 54.0 (74)          |                  | 36.3 (57)   | 44.0 (40)     |       |
| <b>What are the symptoms TB?</b>                            |                    |                    |                  |             |               |       |
| Cough for more than 3 weeks                                 | 58.0 (65)          | 49.6 (70)          | 0.105            | 54.7 (88)   | 51.1 (47)     | 0.890 |
| Sputum with blood                                           | 13.4 (15)          | 9.2 (13)           |                  | 11.2 (18)   | 10.9 (10)     |       |
| Fever                                                       | 15.2 (17)          | 14.2 (20)          |                  | 13.7 (22)   | 16.3 (15)     |       |
| Weight loss                                                 | 2.7 (3)            | 3.5 (5)            |                  | 3.7 (6)     | 2.2 (2)       |       |
| Don't know                                                  | 10.7 (12)          | 23.4 (33)          |                  | 16.8 (27)   | 19.7 (18)     |       |
| <b>How a person can get TB?</b>                             |                    |                    |                  |             |               |       |
| Through germs present in air droplets expelled in the cough | 69.4 (72)          | 37.7 (52)          | <b>&lt;0.001</b> | 55.8 (87)   | 43.0 (37)     | 0.147 |
| Sharing utensils and objects with an infected person        | 3.8 (4)            | 7.2 (10)           |                  | 5.8 (9)     | 5.8 (5)       |       |
| Don't know                                                  | 26.9 (28)          | 55.1 (76)          |                  | 38.5 (60)   | 51.2 (44)     |       |
| <b>How TB is diagnosed?</b>                                 |                    |                    |                  |             |               |       |
| Through sputum examination                                  | 39.0 (39)          | 17.1 (24)          | <b>&lt;0.001</b> | 23.7 (37)   | 31.0 (26)     | 0.409 |
| Through X-ray                                               | 32.0 (32)          | 25.7 (36)          |                  | 28.2 (44)   | 28.6 (24)     |       |
| Don't know                                                  | 29.0 (29)          | 57.1 (80)          |                  | 48.1 (75)   | 40.4 (34)     |       |
| <b>Can TB be cured?</b>                                     |                    |                    |                  |             |               |       |
| Yes                                                         | 93.6 (103)         | 76.3 (106)         | <b>0.001</b>     | 84.8 (134)  | 82.4 (75)     | 0.858 |

|                                                                                        |             |            |              |            |           |              |
|----------------------------------------------------------------------------------------|-------------|------------|--------------|------------|-----------|--------------|
| No                                                                                     | 0.0 (0)     | 2.2 (3)    |              | 1.3 (2)    | 1.1 (1)   |              |
| Don't know                                                                             | 6.4 (7)     | 21.6 (30)  |              | 13.9 (22)  | 16.5 (15) |              |
| <b>Can TB require a longer treatment to be cured as for multidrug resistant forms?</b> |             |            |              |            |           |              |
| Yes                                                                                    | 51.8 (58)   | 34.5 (48)  | <b>0.016</b> | 41.0 (66)  | 44.4 (40) | 0.868        |
| No                                                                                     | 10.7 (12)   | 18.7 (26)  |              | 15.5 (25)  | 14.4 (13) |              |
| Don't know                                                                             | 37.5 (42)   | 46.8 (65)  |              | 43.5 (70)  | 41.2 (37) |              |
| <b>Which symptoms made you seek healthcare?</b>                                        |             |            |              |            |           |              |
| <b>Cough for more than 3 weeks</b>                                                     |             |            |              |            |           |              |
| Yes                                                                                    | 57.1 (64)   | 72.3 (102) | <b>0.011</b> | 65.2 (105) | 66.3 (61) | 0.861        |
| No                                                                                     | 42.9 (48)   | 27.7 (39)  |              | 34.8 (56)  | 33.7 (31) |              |
| <b>Sputum with blood</b>                                                               |             |            |              |            |           |              |
| Yes                                                                                    | 8.0 (9)     | 17.7 (25)  | <b>0.025</b> | 14.3 (23)  | 12.0 (11) | 0.601        |
| No                                                                                     | 92.0 (103)  | 82.3 (116) |              | 85.7 (138) | 88.0 (81) |              |
| <b>Fever</b>                                                                           |             |            |              |            |           |              |
| Yes                                                                                    | 50.9 (57)   | 50.4 (71)  | 0.932        | 50.3 (81)  | 51.1 (47) | 0.905        |
| No                                                                                     | 49.1 (55)   | 49.6 (70)  |              | 49.7 (80)  | 48.9 (45) |              |
| <b>Weight loss</b>                                                                     |             |            |              |            |           |              |
| Yes                                                                                    | 28.6 (32)   | 44.7 (63)  | <b>0.009</b> | 44.7 (72)  | 25.0 (23) | <b>0.002</b> |
| No                                                                                     | 71.4 (80)   | 55.3 (78)  |              | 55.3 (89)  | 75.0 (69) |              |
| <b>Tiredness/weakness</b>                                                              |             |            |              |            |           |              |
| Yes                                                                                    | 38.4 (43)   | 52.5 (74)  | <b>0.026</b> | 50.9 (82)  | 38.0 (35) | <b>0.048</b> |
| No                                                                                     | 61.1 (69)   | 47.5 (67)  |              | 49.1 (79)  | 62.0 (57) |              |
| <b>Dizziness</b>                                                                       |             |            |              |            |           |              |
| Yes                                                                                    | 4.5 (5)     | 6.4 (9)    | 0.507        | 6.8 (11)   | 3.3 (3)   | 0.232        |
| No                                                                                     | 95.5 (107)  | 93.6 (132) |              | 93.2 (150) | 96.7 (89) |              |
| <b>Chest pain</b>                                                                      |             |            |              |            |           |              |
| Yes                                                                                    | 17.0 (19)   | 30.5 (43)  | <b>0.013</b> | 28.6 (46)  | 17.4 (16) | <b>0.047</b> |
| No                                                                                     | 83.0 (4393) | 69.5 (98)  |              | 71.4 (115) | 82.6 (76) |              |
| <b>Night sweat</b>                                                                     |             |            |              |            |           |              |
| Yes                                                                                    | 20.5 (23)   | 30.5 (43)  | 0.073        | 31.1 (50)  | 17.4 (16) | <b>0.017</b> |
| No                                                                                     | 79.5 (89)   | 69.5 (98)  |              | 68.9 (111) | 82.6 (76) |              |
| <b>Did you think you had TB?</b>                                                       |             |            |              |            |           |              |
| Yes                                                                                    | 5.4 (6)     | 11.4 (16)  | 0.090        | 11.8       | 3.3 (3)   | <b>0.022</b> |

|                                                                                                             |                |            |              |                |              |              |
|-------------------------------------------------------------------------------------------------------------|----------------|------------|--------------|----------------|--------------|--------------|
|                                                                                                             |                |            |              | (19)           |              |              |
| No                                                                                                          | 94.6<br>(106)  | 88.6 (124) |              | 88.2<br>(142)  | 96.7<br>(88) |              |
| <b>What factors may have made you delay seeking treatment for symptoms that led to the diagnosis of TB?</b> |                |            |              |                |              |              |
| <b>Not aware of symptoms</b>                                                                                |                |            |              |                |              |              |
| Yes                                                                                                         | 38.4 (43)      | 43.3 (61)  | 0.434        | 57.1<br>(92)   | 62.0 (57)    | 0.454        |
| No                                                                                                          | 61.6 (69)      | 56.7 (80)  |              | 42.9<br>(69)   | 38.0 (35)    |              |
| <b>Fear of rejection/ losing my job</b>                                                                     |                |            |              |                |              |              |
| Yes                                                                                                         | 2.7 (3)        | 6.4 (9)    | 0.169        | 5.6 (9)        | 3.3 (3)      | 0.402        |
| No                                                                                                          | 97.3<br>(109)  | 93.6 (132) |              | 94.4<br>(152)  | 96.7 (89)    |              |
| <b>Expensive</b>                                                                                            |                |            |              |                |              |              |
| Yes                                                                                                         | 0.0 (0)        | 9.2 (13)   | <b>0.001</b> | 5.6 (9)        | 4.3 (4)      | 0.667        |
| No                                                                                                          | 100.0<br>(112) | 90.8 (128) |              | 94.4<br>(152)  | 95.7 (88)    |              |
| <b>Lack of time</b>                                                                                         |                |            |              |                |              |              |
| Yes                                                                                                         | 5.4 (6)        | 7.1 (10)   | 0.573        | 5.6 (9)        | 7.6 (7)      | 0.526        |
| No                                                                                                          | 94.6<br>(106)  | 92.9 (131) |              | 94.4<br>(152)  | 92.4 (85)    |              |
| <b>Distance to health centre</b>                                                                            |                |            |              |                |              |              |
| Yes                                                                                                         | 0.9 (1)        | 2.8 (4)    | 0.270        | 2.5 (4)        | 1.1 (1)      | 0.442        |
| No                                                                                                          | 99.1<br>(111)  | 97.2 (137) |              | 97.5<br>(157)  | 98.9 (91)    |              |
| <b>Lack of transportation</b>                                                                               |                |            |              |                |              |              |
| Yes                                                                                                         | 0.9 (1)        | 0.7 (1)    | 0.870        | 0.0 (0)        | 2.2 (2)      | 0.060        |
| No                                                                                                          | 99.1<br>(111)  | 99.3 (140) |              | 100.0<br>(161) | 97.8 (90)    |              |
| <b>Previous non-satisfactory experience with the health system</b>                                          |                |            |              |                |              |              |
| Yes                                                                                                         | 1.8 (2)        | 2.1 (3)    | 0.846        | 1.9 (3)        | 2.2 (2)      | 0.864        |
| No                                                                                                          | 98.2<br>(110)  | 97.9 (138) |              | 98.1<br>(158)  | 97.8 (90)    |              |
| <b>Other (clandestine)</b>                                                                                  |                |            |              |                |              |              |
| Yes                                                                                                         | -              | -          | -            | 9.3<br>(15)    | 1.1 (1)      | <b>0.010</b> |
| No                                                                                                          | -              | -          | -            | 90.7<br>(146)  | 98.9 (91)    |              |

\*p-values <0.05 are indicated in bold

TB: tuberculosis

Table S2. Attitude towards TB stratified for gender and country of birth

|                                                                                                 | Italian-born<br>% (N) | Foreign-born<br>% (N) | p*               | Males<br>% (N) | Females<br>% (N) | p*               |
|-------------------------------------------------------------------------------------------------|-----------------------|-----------------------|------------------|----------------|------------------|------------------|
| <b>Should people with TB disclose their illness to other people?</b>                            |                       |                       |                  |                |                  |                  |
| Yes                                                                                             | 70.5 (79)             | 47.1 (66)             | <b>0.001</b>     | 53.1 (85)      | 65.2 (60)        | <b>0.040</b>     |
| No                                                                                              | 8.9 (10)              | 19.3 (27)             |                  | 18.8 (30)      | 7.6 (7)          |                  |
| Don't know                                                                                      | 20.5 (23)             | 33.6 (47)             |                  | 28.1 (45)      | 27.2 (25)        |                  |
| <b>Who do you think is more likely to get TB, men or women?</b>                                 |                       |                       |                  |                |                  |                  |
| Men                                                                                             | 12.5 (14)             | 15.0 (21)             | 0.305            | 21.2 (34)      | 1.1 (1)          | <b>&lt;0.001</b> |
| Women                                                                                           | 5.4 (6)               | 10.0 (14)             |                  | 4.4 (7)        | 14.1 (13)        |                  |
| Don't know                                                                                      | 82.1 (92)             | 75.0 (105)            |                  | 74.9 (119)     | 84.8 (78)        |                  |
| <b>How did you feel when you found out that you had TB?</b>                                     |                       |                       |                  |                |                  |                  |
| Scared                                                                                          | 37.5 (42)             | 45.4 (64)             | 0.376            | 36.6 (59)      | 51.1 (47)        | 0.164            |
| Depressed                                                                                       | 20.5 (23)             | 14.2 (20)             |                  | 18.0 (29)      | 15.2 (14)        |                  |
| Didn't believe (denial)                                                                         | 29.5 (33)             | 31.2 (44)             |                  | 33.5 (54)      | 25.0 (23)        |                  |
| Other                                                                                           | 12.5 (14)             | 9.2 (13)              |                  | 11.8 (19)      | 8.7 (8)          |                  |
| <b>Did you inform your friends/ family that you had TB?</b>                                     |                       |                       |                  |                |                  |                  |
| Yes                                                                                             | 90.9 (100)            | 55.1 (76)             | <b>&lt;0.001</b> | 61.4 (97)      | 87.8 (79)        | <b>&lt;0.001</b> |
| No                                                                                              | 9.1 (10)              | 44.9 (62)             |                  | 38.6 (61)      | 12.2 (11)        |                  |
| <b>Have your relationships with your friends/ family changed since finding out you have TB?</b> |                       |                       |                  |                |                  |                  |
| Yes                                                                                             | 22.0 (24)             | 14.7 (20)             | 0.138            | 15.4 (24)      | 22.5 (20)        | 0.165            |
| No                                                                                              | 78.0 (85)             | 85.3 (116)            |                  | 84.6 (132)     | 77.5 (69)        |                  |
| <b>If yes, how?</b>                                                                             |                       |                       |                  |                |                  |                  |
| Improved                                                                                        | 41.7 (10)             | 10.5 (2)              | <b>0.024</b>     | 26.1 (6)       | 30.0 (6)         | 0.775            |
| Worsened                                                                                        | 58.3 (14)             | 89.5 (17)             |                  | 73.9 (17)      | 70.0 (14)        |                  |
| <b>Are people with TB discriminated in the community?</b>                                       |                       |                       |                  |                |                  |                  |
| Yes                                                                                             | 46.4 (51)             | 41.0 (57)             | <b>0.002</b>     | 40.3 (64)      | 48.9 (44)        | 0.386            |
| No                                                                                              | 33.6 (37)             | 19.4 (27)             |                  | 26.4 (42)      | 24.4 (22)        |                  |
| Don't know                                                                                      | 20.0 (22)             | 39.6 (55)             |                  | 33.3 (53)      | 26.7 (24)        |                  |
| <b>Among TB patients, are male or female patients more discriminated?</b>                       |                       |                       |                  |                |                  |                  |
| Male                                                                                            | 3.7 (4)               | 9.3 (13)              | <b>0.027</b>     | 10.1 (16)      | 1.1 (1)          | <b>&lt;0.001</b> |
| Female                                                                                          | 2.85 (3)              | 8.6 (12)              |                  | 2.5 (4)        | 12.1 (11)        |                  |
| Don't know                                                                                      | 93.6 (102)            | 82.1 (115)            |                  | 87.3 (138)     | 86.8 (79)        |                  |

\*p-values <0.05 are indicated in bold

TB: tuberculosis

**Table S3. Risk analysis for DD (Univariate and logistic regression analysis)**

|                                                                                             | DD<br>>7 days<br>% | OR<br>95%CI               | p                | aOR<br>95%CI              | p                |
|---------------------------------------------------------------------------------------------|--------------------|---------------------------|------------------|---------------------------|------------------|
| <b>Foreign-born patients</b>                                                                |                    |                           |                  |                           |                  |
| Yes <sup>^</sup>                                                                            | 36.6               | 1                         | <b>&lt;0.001</b> | 1                         | <b>0.024</b>     |
| No                                                                                          | 64.7               | <b>0.32 (0.18 – 0.54)</b> |                  | <b>0.48 (0.25 – 0.91)</b> |                  |
| <b>Chronic disease</b>                                                                      |                    |                           |                  |                           |                  |
| Yes <sup>^</sup>                                                                            | 59.3               | 1                         | 0.061            | -                         | -                |
| No                                                                                          | 45.1               | 1.77 (0.97 – 3.24)        |                  |                           |                  |
| <b>Gender</b>                                                                               |                    |                           |                  |                           |                  |
| Female <sup>^</sup>                                                                         | 37.5               | 1                         | <b>0.008</b>     | 1                         | <b>&lt;0.001</b> |
| Male                                                                                        | 55.9               | <b>0.47 (0.27 – 0.83)</b> |                  | <b>0.30 (0.15 – 0.58)</b> |                  |
| <b>First visit: General practitioner</b>                                                    |                    |                           |                  |                           |                  |
| Yes <sup>^</sup>                                                                            | 71.2               | 1                         | <b>&lt;0.001</b> | -                         | -                |
| No                                                                                          | 40.5               | <b>3.63 (1.95 – 6.77)</b> |                  |                           |                  |
| <b>First visit: Hospital</b>                                                                |                    |                           |                  |                           |                  |
| Yes <sup>^</sup>                                                                            | 36.1               | 1                         | <b>&lt;0.001</b> | 1                         | <b>0.002</b>     |
| No                                                                                          | 67.0               | <b>0.28 (0.16 – 0.49)</b> |                  | <b>0.35 (0.18 – 0.67)</b> |                  |
| <b>After first visit, did you seek treatment from somewhere else?</b>                       |                    |                           |                  |                           |                  |
| Yes <sup>^</sup>                                                                            | 71.0               | 1                         | <b>&lt;0.001</b> | -                         | -                |
| No                                                                                          | 34.4               | <b>4.67 (2.62 – 8.31)</b> |                  |                           |                  |
| <b>Cough more than 3 weeks</b>                                                              |                    |                           |                  |                           |                  |
| Yes <sup>^</sup>                                                                            | 44.2               | 1                         | <b>0.035</b>     | 1                         | <b>0.048</b>     |
| No                                                                                          | 59.0               | <b>0.55 (0.32 – 0.96)</b> |                  | <b>0.51 (0.27 – 0.99)</b> |                  |
| <b>Dizziness</b>                                                                            |                    |                           |                  |                           |                  |
| Yes <sup>^</sup>                                                                            | 23.1               | 1                         | <b>0.051</b>     | 1                         | <b>0.039</b>     |
| No                                                                                          | 50.9               | <b>0.28 (0.08 – 1.08)</b> |                  | <b>0.21 (0.04 – 0.92)</b> |                  |
| <b>Prior unspecific treatment</b>                                                           |                    |                           |                  |                           |                  |
| Yes <sup>^</sup>                                                                            | 60.4               | 1                         | <b>&lt;0.001</b> | 1                         | <b>0.002</b>     |
| No                                                                                          | 33.0               | <b>3.11 (1.78 – 5.43)</b> |                  | <b>2.85 (1.47 – 5.52)</b> |                  |
| <b>With whom did you have repeated visits?: Different providers in a different facility</b> |                    |                           |                  |                           |                  |
| Yes <sup>^</sup>                                                                            | 66.3               | 1                         | <b>&lt;0.001</b> | -                         | -                |
| No                                                                                          | 37.6               | <b>3.26 (1.82 – 5.86)</b> |                  |                           |                  |

\*p-values <0.05 are indicated in bold

<sup>^</sup> reference category

# BMJ Open

## Determinants of patient and health system delay among Italian and foreign-born pulmonary tuberculosis patients: a multicentre cross-sectional study

|                                 |                                                                                                                                                                                                                                                                                                                                                                                                                                                                                                                                                                                                                                                                                                                                                                                                                                                                                                                                                    |
|---------------------------------|----------------------------------------------------------------------------------------------------------------------------------------------------------------------------------------------------------------------------------------------------------------------------------------------------------------------------------------------------------------------------------------------------------------------------------------------------------------------------------------------------------------------------------------------------------------------------------------------------------------------------------------------------------------------------------------------------------------------------------------------------------------------------------------------------------------------------------------------------------------------------------------------------------------------------------------------------|
| Journal:                        | <i>BMJ Open</i>                                                                                                                                                                                                                                                                                                                                                                                                                                                                                                                                                                                                                                                                                                                                                                                                                                                                                                                                    |
| Manuscript ID                   | bmjopen-2017-019673.R2                                                                                                                                                                                                                                                                                                                                                                                                                                                                                                                                                                                                                                                                                                                                                                                                                                                                                                                             |
| Article Type:                   | Research                                                                                                                                                                                                                                                                                                                                                                                                                                                                                                                                                                                                                                                                                                                                                                                                                                                                                                                                           |
| Date Submitted by the Author:   | 20-Mar-2018                                                                                                                                                                                                                                                                                                                                                                                                                                                                                                                                                                                                                                                                                                                                                                                                                                                                                                                                        |
| Complete List of Authors:       | Quattrocchi, Annalisa; University of Catania, GF Ingrassia<br>Barchitta, Martina; University of Catania, GF Ingrassia; LaPoSS, Laboratory of Policies and Social Services, University of Catania, Catania, Italy<br>Nobile, Carmelo; University of Catanzaro "Magna Græcia", Department of Health Sciences<br>Prato, Rosa; University of Foggia, Department of Medical and Surgical Sciences<br>Sotgiu, Giovanni; University of Sassari, Department of Biomedical Sciences, Clinical Epidemiology and Medical Statistics Unit<br>Casuccio, Alessandra; University of Palermo, Department of Sciences for Health Promotion and Mother-Child Care "G. D'Alessandro"<br>Vitale, Francesco; University of Palermo, Department of Sciences for Health Promotion "G. D'Alessandro" – Hygiene section<br>Agodi, Antonella; University of Catania, GF Ingrassia; LaPoSS, Laboratory of Policies and Social Services, University of Catania, Catania, Italy |
| <b>Primary Subject Heading</b>: | Public health                                                                                                                                                                                                                                                                                                                                                                                                                                                                                                                                                                                                                                                                                                                                                                                                                                                                                                                                      |
| Secondary Subject Heading:      | Epidemiology, Health policy, Medical education and training, Patient-centred medicine, Public health                                                                                                                                                                                                                                                                                                                                                                                                                                                                                                                                                                                                                                                                                                                                                                                                                                               |
| Keywords:                       | Surveillance, Public health policy, Social epidemiology, Quality in health care < HEALTH SERVICES ADMINISTRATION & MANAGEMENT, Epidemiology < INFECTIOUS DISEASES, Tuberculosis patients                                                                                                                                                                                                                                                                                                                                                                                                                                                                                                                                                                                                                                                                                                                                                           |
|                                 |                                                                                                                                                                                                                                                                                                                                                                                                                                                                                                                                                                                                                                                                                                                                                                                                                                                                                                                                                    |

SCHOLARONE™  
Manuscripts

1  
2  
3 **Determinants of patient and health system delay among Italian and foreign-born pulmonary**  
4 **tuberculosis patients: a multicentre cross-sectional study**  
5  
6  
7  
8  
9

10 **Authors:** Annalisa Quattrocchi<sup>1</sup>, Martina Barchitta<sup>1,2</sup>, Carmelo Nobile<sup>3</sup>, Rosa Prato<sup>4</sup>, Giovanni Sotgiu<sup>5</sup>,  
11  
12 Alessandra Casuccio<sup>6</sup>, Francesco Vitale<sup>6</sup>, Antonella Agodi<sup>1,2\*</sup>, on behalf of the CCM 2013 TB network  
13

14 To the memory of Professor Caterina Mammina, University of Palermo, First Coordinator of the project  
15  
16  
17

18 **Affiliations:**

19 <sup>1</sup>Department of Medical and Surgical Sciences and Advanced Technologies “GF Ingrassia”, University of  
20 Catania, Italy

21 <sup>2</sup>LaPoSS, Laboratory of Policies and Social Services, University of Catania, Catania, Italy

22 <sup>3</sup>Department of Health Sciences, University of Catanzaro 'Magna Græcia', Catanzaro, Italy

23 <sup>4</sup>Department of Medical and Surgical Sciences, University of Foggia, Foggia, Italy

24 <sup>5</sup>University of Sassari, Department of Biomedical Sciences, Clinical Epidemiology and Medical Statistics  
25 Unit, Sassari, Italy

26 <sup>6</sup>Department of Sciences for Health Promotion and Mother-Child Care "G. D'Alessandro", University of  
27 Palermo, Italy  
28

29 **\*Corresponding author:**

30 Professor Antonella Agodi

31 Department *GF Ingrassia*

32 University of Catania, Italy

33 Via S. Sofia, 87

34 Comparto 10 Edificio C

35 95123 Catania Italy

36 Tel/Fax: +39.095.3782183

37 Mobile: +39.348.3538195

38 eMail: [agodia@unict.it](mailto:agodia@unict.it)  
39  
40  
41  
42  
43  
44  
45  
46  
47  
48  
49  
50  
51  
52  
53  
54  
55  
56  
57  
58  
59  
60

## ABSTRACT

### Objectives

The aim of this cross-sectional study was to identify key factors associated with patient delay (PD), health system delay (HSD) and total delay (TOTD) in tuberculosis (TB) patients to inform TB control programs.

### Setting

The study was carried out in four Italian regions (Calabria, Apulia, Sardinia, and Sicily) from October 2014 to July 2016. Data were obtained using a questionnaire including: socio-demographic and lifestyle data, integration index, comorbidities, patient knowledge and attitudes towards TB, stigma, access to TB care, health seeking behaviours, and satisfaction with care.

### Participants

Patients' inclusion criteria were being diagnosed as a new smear positive pulmonary TB case and living in one of the above-mentioned Italian regions. A total of 344 patients from 30 healthcare centres were invited to participate and 253 patients were included in the analysis (26.5% non-response rate). Overall, 63.6% of patients were males and 55.7% were non-Italian born.

### Outcome measures

Risk factors for PD, HSD and TOTD in TB patients were assessed by multivariable analysis, adjusting for confounding.

### Results

Median PD, HSD and TOTD were 30, 11 and 45 days, respectively. Factors associated with longer PD were: stigma, chest pain, weight loss, paying for transportation and distance to the health centre (the latter three also associated with TOTD). Being foreign-born, female and seeking care for the first time at hospital were associated with shorter HSD, while, prior unspecific treatment was associated with longer HSD and TOTD. Sputum with blood and repeated visits with the same provider showed shorter TOTD.

### Conclusions

The study identifies several determinants of delays associated with patient's behaviours and healthcare qualities. Tackling TB effectively requires addressing key risk factors that make individuals more vulnerable

1  
2  
3 by the means of public health policy, cooperation and advocacy to ensure that all patients have easy access to  
4  
5 care and receive high quality healthcare.

### 6 **Strengths and limitations of this study**

- 7  
8 – This is the first multiregional cross-sectional study, in Italy, investigating the association of key  
9  
10 factors with patient delay, health system delay and total delay in pulmonary tuberculosis patients.
- 11  
12 – Data were collected by healthcare providers and cultural mediators, using a multilingual standardised  
13  
14 questionnaire.
- 15  
16 – The prospective collection of data and the adjustment for confounding factors with logistic  
17  
18 regression analysis are among the strengths of the present study.
- 19  
20 – A selection bias should be considered, especially for foreign-born patients who may have  
21  
22 experienced difficulties during the interview, resulting in refusal or in missing data.
- 23  
24 – Self-reported dates for onset of symptoms and health care seeking may have been affected by recall  
25  
26 bias.
- 27  
28  
29

### 30 **Keywords**

31  
32 Surveillance; public health policy; social epidemiology; TB patients.  
33  
34  
35  
36  
37  
38  
39  
40  
41  
42  
43  
44  
45  
46  
47  
48  
49  
50  
51  
52  
53  
54  
55  
56  
57  
58  
59  
60

## INTRODUCTION

Early diagnosis and prompt treatment of tuberculosis (TB) disease represent key components of any effective national TB control programme.<sup>1 2</sup> If adequately implemented and scaled-up, they can contribute to the reduction of *Mycobacterium tuberculosis* transmission and TB elimination by 2050.<sup>3</sup>

However, delays in diagnosis and treatment of TB frequently occur.<sup>4</sup> Long delays lead to a more advanced disease that may result in poor response to therapies, undesirable clinical *sequelae*, and higher mortality risk.<sup>5</sup> In addition, delay contributes to *M. tuberculosis* transmission within the community.<sup>6 7</sup> It has been shown that an untreated smear-positive patient can infect, on average, 10 healthy contacts annually.<sup>8</sup> Finally, TB diagnosis delay is associated with higher direct and indirect costs.<sup>9</sup>

Delay may occur at patient or at health system level. Factors contributing to patient delay (PD) can be: socio-demographic, physical, financial, health literacy, religious-cultural and stigma.<sup>10</sup> Health system delay (HSD) related factors can be: poor TB knowledge by healthcare providers and poor availability of effective diagnostic tools, number and types of providers encountered before TB diagnosis, patient satisfaction with TB services and waiting time.<sup>10 11</sup> Thus, understanding and identifying the causes of delay in diagnosis and treatment initiation are critical to strengthen TB control programs. Particularly, the importance of social variables as drivers of epidemics and disease risk has been long recognised. Incorporating the perspectives and methods of social epidemiology into studies of infectious disease, many opportunities arise to control the disease.<sup>12</sup>

However, in Europe, and especially in Italy, few studies have focused on social determinants and TB delays. The aim of the present study was to identify the duration and the key factors related to PD, HSD and total delay (TOTD) in pulmonary TB patients, in four Italian Southern regions, with a focus on social determinants.

## **METHODS**

### **Study design**

The present cross-sectional study was conducted in four Italian regions (Calabria, Apulia, Sardinia, and Sicily) from October 2014 to July 2016, and was approved and financed by the Italian Ministry of Health.

Patients' inclusion criteria were being diagnosed as a new smear positive pulmonary TB case (with or without extra-pulmonary TB) and living in one of the above-mentioned Italian regions. Foreign-born patients were enrolled regardless of their legal migrant status (e.g. refugees, asylum seeker, and illegal migrants). Negative smear, relapse, retreatment cases and those with only extra-pulmonary TB were excluded.

The project was performed according to the Declaration of Helsinki, participants were fully informed of the purpose of the study and signed a written informed consent. All data collected were treated confidentially and analysed in aggregated and anonymous form.

### **Patient and Public Involvement**

The present study was conducted without patient and public involvement. Results of the research will be available on request to any study participant to disseminate key study findings providing feedback on the research outcome towards which they have contributed.

### **Sample Size calculation and Sampling Procedure**

A sample size of 261 was estimated by using single population proportion estimation formula with an assumption of 95% confidence interval, 6% margin of error, and 50.4% proportion of PD (> 30 days).<sup>13</sup>

Furthermore, considering 20% of nonresponse rate, the final sample size was 321. All patients meeting the inclusion criteria, attending the healthcare facility during the study period, were prospectively invited to participate in the study.

### **Data collection and definitions**

Data were collected by healthcare workers of each participating centre, during a face-to-face interview at the time when patients were diagnosed and/or initiated treatment. A standardised questionnaire available in Italian, English, and French was used, and if possible, a cultural and linguistic mediator assisted the interview with the task to facilitate communication and understanding, both on linguistic and cultural level.

1  
2  
3 Operators with adequate background of the health topic, within the specific cultures/languages, supported  
4 and assisted patients and healthcare professionals during clinical examinations.  
5

6  
7 The questionnaire contained several domains: i) socio-demographic and lifestyle data; ii) integration index  
8 (II) in Italy (only for foreign-born patients), computed as described in a previous study;<sup>14</sup> iii) TB  
9 comorbidities; iv) patient knowledge of TB-associated symptoms and attitudes towards TB; v) TB related  
10 stigma, measured according to the WHO questionnaire;<sup>15</sup> vi) access to TB diagnosis and treatment and health  
11 seeking behaviours; vii) dates of onset of symptoms, first contact with healthcare service, TB diagnosis  
12 confirmation and treatment initiation; viii) satisfaction with care, assessed by adopting and modifying the  
13 USAID questionnaire.<sup>16</sup>  
14

15  
16 PD was defined as the time interval between the onset of symptoms and patient's first contact with any type  
17 of health care service (including hospital and primary health care).<sup>15 16</sup> HSD was defined as the time interval  
18 between the first consultation with a healthcare provider and the initiation of treatment.<sup>15 16</sup> This can be  
19 subdivided into: diagnostic delay (DD) as the time interval between the presentation to a healthcare provider  
20 and the date of diagnosis and treatment delay (TD) as the time interval between TB diagnosis and initiation  
21 of anti-TB treatment. Thus, TOTD was defined as the time interval from onset of symptoms until treatment  
22 initiation.<sup>16 17</sup>  
23

### 24 25 26 27 28 29 30 31 32 33 34 **Statistical analysis**

35  
36 Statistical analyses were performed using the SPSS software (IBM SPSS Statistics for Windows, version  
37 22.0).  
38

39  
40 The response rate and descriptive statistics were used to characterise the sample using frequencies, means,  
41 medians and interquartile ranges (IQRs). Valid percentage was reported when missing data were excluded.  
42

43  
44 Poverty was defined in relation to housing circumstances as living in community centres, first aid centres or  
45 prisons. Education level was dichotomised into two categories (high and low), using a cut-off of 8 school  
46 years.  
47

48  
49 Variables related to stigma and satisfaction with care were recorded on a 5-point Likert scale.<sup>15 16</sup> Scores  
50 were converted as mean percentage score, calculated as follows: (sum of score obtained/maximum score that  
51 could be obtained) × 100.  
52  
53  
54  
55

1  
2  
3 For TB cases born abroad, the II was calculated based on the score sum of 11 selected variables from the  
4 study questionnaire and then standardised to range from 0 to 10.<sup>14</sup>

5  
6 Longer delays (outcome) were defined according to previous Italian studies. Particularly, long PD was  
7 defined as >30 days, while long HSD and TOTD were defined as > the median value observed in the study  
8 population, for HSD and TOTD, respectively.<sup>13 18</sup>

9  
10 Prevalence estimates of longer delay, using cut-off values reported from other studies, were reported in  
11 Supplementary Table S1.

12  
13 Median values were also used as cut-off points to dichotomise quantitative variables (e.g. age and stigma).  
14  
15 The two-tailed Chi-squared test was used for the statistical comparison of categorical variables, whereas  
16  
17 quantitative variables were compared using Student's *t* test, as the sample was big enough. The Levene's test  
18  
19 was performed to verify the homogeneity of variance across groups.

20  
21 The characteristics of patients with longer delays (all forms) were compared to those of patients without  
22  
23 (comparators) and the crude odds ratios (ORs) and the corresponding 95% confidence intervals (95% CIs)  
24  
25 were computed.

26  
27 All variables with  $P < 0.1$  on univariate analysis were included in the multivariable logistic regression  
28  
29 analysis, using a backward-stepwise selection procedure. The breakpoint for variable removal was set at  $P =$   
30  
31 0.10. The adjusted ORs (aOR) with the respective 95% CIs were reported. A  $P$ -value  $< 0.05$  was considered  
32  
33 statistically significant.

## RESULTS

A total of 344 patients from 30 healthcare centres were invited to participate. Overall, 91 (26.5%) refused the interview, and 253 patients were included in the analysis. Patients who refused the interview were older than patients who agreed (mean age: 46.0 and 40.7 years, respectively;  $P = 0.023$ ). However, no statistical differences resulted for Country of birth and gender. Completion rate for all questions included in the analysis was  $\geq 80\%$ .

Overall, 55.3% of patients were temporary or permanently living in Sicily, 22.1% in Calabria, 17.4% in Apulia, and 5.2% in Sardinia.

Table 1 shows the main characteristics of the study population and comparisons for Country of birth and gender. Mean age was 40.7 years (median: 38; IQR 27-53) and 63.6% were males. One hundred forty-one (55.7%) patients were born abroad and they were younger than Italians (mean age: 34.3 years and 48.7 years, respectively;  $P < 0.001$ ).

Stratifying by Country of origin, 47.9% of patients came from European Countries, and mostly from Romania (82.1%), 28.6% from the African Countries, 11.4% from Eastern Mediterranean Countries, 9.3% from South-East Asia, 2.1% from Western Pacific Countries, and 0.7% from American Countries. Foreign-born patients reported higher degree of poverty and literacy: they lived in nursing homes or did not have permanent residency (47.8%), 64.7% were unemployed or occasional workers, and 79.4% were illiterate or had less than 8 years of educational activities ( $P < 0.05$ ).

About one-third suffered of chronic diseases (i.e. HIV/AIDS, diabetes, chronic obstructive pulmonary disease, disability, renal failure and cardiovascular disease), particularly those born in Italy (39.1%). Current smokers and alcohol users were 27.2% and 6.9%, respectively. Higher percentages of smokers and alcohol users were found among male patients (32.5% and 10.1%). However, no significant differences were observed between Italian and foreign-born patients (Table 1).

### Patient knowledge and symptoms recognition

Foreign-born patients reported lack of knowledge on the disease more often compared with Italian-born (Supplementary Table S2). Foreign-born patients were less aware that TB is an infectious disease and is transmitted by airborne bacteria. They did not know the symptoms most frequently associated with the

disease, how TB is diagnosed and cured, and that multi-drug resistant TB may require a longer treatment time to achieve a cure ( $P < 0.05$ ).

Only 3.6% of TB patients reported no symptoms, while 49% of patients reported three or more symptoms. Overall, 65.6% had cough for more than 3 weeks. Sputum with blood was reported by only 13.4% of patients. The main reason for not seeking care was that they perceived the TB symptoms to be mild (58.9%). Foreign-born patients reported more frequently the following symptoms: cough, sputum with blood, weakness, weight loss, and chest pain, compared with Italian-born patients. Furthermore, women reported tiredness/weakness, weight loss, chest pain, and night sweating less frequently compared with men. Being irregular migrants was the only reason for delayed seeking care in women, while in men other motivations were reported (Table S2).

### **Attitude towards TB and stigma**

A higher percentage of men (38.6%) and foreign-born patients (44.9%) did not inform their families and friends on the disease, compared with women (12.2%) and Italian-born (9.1%) ( $P < 0.001$ ). Detailed results are reported in Supplementary Table S3.

A moderate level of stigma was found (mean: 59.5%; median and IQR: 58.7%, 22.7%-94.7%) in all patients. Overall, 53.9% of foreign-born patients reported TB related stigma above the median value, compared with 41.4% of Italian born ( $P = 0.049$ ) (Table 1).

### **Healthcare-seeking behaviour and access to TB care centres**

General Practitioners (GP) were consulted, as first choice, by 30% of patients, mostly Italians (46.8%). On the contrary, foreign-born cases were shown to seek more frequently the hospital care (70.3%). Around 41% of the cases were visited by more than one healthcare provider, and this was mainly reported by the Italian group (53.2% vs. 31.7%;  $P = 0.001$ ). Overall, 59% of the cases received unspecific treatment (mainly antibiotics) before TB diagnosis; this occurred more frequently among cases born in Italy (75.7% vs. 51.6%;  $P = 0.005$ ).

### **Risk analysis of delay**

Median PD, HSD and TOTD were 30, 11, and 45 days, respectively (Table 1). On univariate analysis, factors associated with long PD ( $> 30$  days) were TB-related stigma, paying for transportation and distance

1  
2  
3 to get to the healthcare centre, presence of unintentional weight loss, fatigue and chest pain. All these factors,  
4 but fatigue remained associated with PD on multivariate analysis (Table 2).

5  
6 Prior unspecific treatment, patients referring to a GP at the first visit, and those visited by multiple providers  
7 in different facilities were more likely to report long HSD (> 11 days), while female gender, non-Italian  
8 origin, seeking care at hospital level, presence of cough for more than 3 weeks and dizziness were associated  
9 with shorter HSD. On multivariate analysis, being foreign-born and female, seeking care at hospital and  
10 presence of dizziness remained associated with shorter HSD. Instead, prior unspecific treatment was  
11 associated with longer HSD (Table 3).

12  
13 Factors associated with long DD (>7 days), were identical to those associated with HSD, and in addition,  
14 having cough for more than 3 weeks was significantly associated with shorter DD (Table S4). No variables  
15 were associated with long TD (>2 days).

16  
17 Finally, good knowledge of TB, paying for transportations, distance to reach the health centre, prior  
18 unspecific treatment, and weight loss were associated with long TOTD (> 45 days), while patients reporting  
19 cough and hemophthisis and who had repeated visits with the same provider showed shorter TOTD. In the  
20 logistic regression analysis, all variables except cough and knowledge of the disease were confirmed (Table  
21 4).

## DISCUSSION

Reducing the time interval between symptoms recognition and TB treatment can decrease mycobacterial transmission, morbidity, and mortality. Although there is no general consensus on what may constitute an acceptable interval between onset of symptoms and initiation of TB treatment,<sup>19</sup> it has been suggested that overall TB delay could be used as a key indicator of programme performance.<sup>4</sup>

The TB notification rate in the general Italian population has been stable in the last years.<sup>20</sup> However, most of the cases occur in vulnerable groups, who do not recognise the symptoms or have poor access to healthcare services. The two most affected groups are the elderly and foreign-born people. The latter group accounts for about 50% of all TB cases in Italy (data until 2008).<sup>21</sup>

In our study, 55.7% patients were foreign-born, and they were younger than Italians. Younger age among foreign-born patients has also been reported in other studies.<sup>13 22</sup> Although, the TB notification rate is decreasing in Europe, the reduction in individuals of foreign origin is still slower than in native residents. This represents one of the main challenges for TB elimination, especially in those European countries where individuals of foreign-born origin represent a large proportion of TB cases.<sup>23</sup>

In our study, the median values for PD (30 days) and HSD (11 days, of which 7 days for DD and 2 days for TD, respectively) are similar to those reported by other studies conducted in Italy and in other European countries with a low-TB incidence. Particularly, a recent Italian study reported median PD and HSD values of 31 and 15 days, respectively.<sup>13</sup> European studies reported median PDs of 14 days (France),<sup>24</sup> 28 days (Norway),<sup>25</sup> and 29 days (UK).<sup>19</sup> Considering HSD (and its two components), studies reported median values of 15 days (Croatia),<sup>26</sup> 25 days (for DD in France),<sup>24</sup> 30 days (UK),<sup>19</sup> and 33 days (Norway).<sup>25</sup> However, in our study, median TOTD (45 days) was lower than values reported elsewhere, which ranged between 62 days (UK),<sup>19</sup> and 63 days (Norway).<sup>25</sup>

Table S1 shows median values reported by other studies,<sup>13 19 24-26</sup> and the prevalence of delay that would have been detected in our study, by using them.

It is worth noting that some studies evaluated both forms of TB (pulmonary and extra-pulmonary), and tools for data collection and definitions of delays were widely heterogeneous among studies, thus comparisons should be made with caution.

1  
2  
3 Nevertheless, median values detected in our study are encouraging. Indeed, for PD a median value of 30  
4 days has been considered an acceptable value by many authors,<sup>18 27</sup> although others have suggested values  
5 less than 3 weeks.<sup>28</sup>  
6

7  
8 Regarding HSD, our median value is below the accepted value, which is considered to be 15 days.<sup>27</sup> Low  
9 values of HSD and TOTD might probably due to a higher level of awareness of TB among involved  
10 healthcare professionals in Italy, in recent years. Similarly to our results, other studies have found that PD  
11 was longer than HSD,<sup>13 29</sup> while others have found the opposite,<sup>24 25</sup> or no differences.<sup>19</sup> It is likely that  
12 patients who contact the health system later could have more severe symptoms facilitating TB suspicion and  
13 prompt diagnosis,<sup>13</sup> thus the higher the PD, the lower the HSD, and *vice versa*.<sup>4 25</sup>  
14  
15

16  
17 In our study, longer PD was associated with high degree of stigma, paying for transportation, distance to  
18 healthcare facility, presence of unintentional weight loss and chest pain. Aside from stigma and chest pain all  
19 others were also detected as risk factors for TOTD. Our results are consistent with findings of the WHO  
20 Eastern Mediterranean Region study, where stigma, economic factors, and time to reach the health facility  
21 were among the main determinants for delayed access to healthcare system.<sup>15</sup>  
22  
23

24  
25 TB-related stigma represents a cultural aspect which drives individuals to hide their condition from others,  
26 and refusing seeking care,<sup>30</sup> but evidence shows that stigma barriers may be avoided through interventions  
27 addressed improving TB-related health literacy.<sup>10</sup>  
28  
29

30  
31 The reason why chest pain and weight loss were associated with long PD is not clear, because these  
32 symptoms, together with persistent cough, are considered key TB signs. Other studies retrieved similar  
33 results. Chest pain was found positively associated with longer PD (> 90 days) in a Brazilian study,<sup>31</sup> and  
34 with TOTD (>60 days) in Ethiopia.<sup>27</sup> Similarly, weight loss was associated with longer PD, both in Brazil  
35 (>30 days)<sup>31</sup> and in Italy (>15 days),<sup>13</sup> with PD (>27 days) and TOTD (>50 days) in Uzbekistan,<sup>32</sup> and with  
36 HSD (>18 days) in another Brazilian study.<sup>33</sup> These results could be explained by the assumption that  
37 patients consider these as transient symptoms from a general illness, hence, maybe, initiating self-treatment  
38 lasting until deterioration and manifestation of other specific symptoms. Furthermore, timely referral to  
39 healthcare facilities for disabling symptoms may be challenging due to financial constraints, poor health  
40  
41  
42  
43  
44  
45  
46  
47  
48  
49  
50  
51  
52  
53  
54  
55  
56  
57  
58  
59  
60

1  
2  
3 literacy, and stigma. In addition, a long delay until diagnosis favours disease progression and therefore  
4 symptom appearance. Also, non-specific symptoms could lead to longer suspicion delays by the clinician.

5  
6 Especially for foreign-born patients, language barriers, poor knowledge of symptoms, fear of immigration  
7 authorities and long wait for appointment have been associated with delay in seeking care,<sup>34 35</sup> raising  
8 concerns about the equity of access to care among TB patient. Thus, understanding immigrants' views of TB  
9 and the obstacles that they face when accessing the health system, taking into consideration the social,  
10 economic and legislative context of the new Country where they live, has an important role and should be  
11 considered in TB control programmes.  
12

13  
14 The association of HSD with birth place might be due to the low TB rate in Italy, thus TB would be less  
15 suspected and investigated in the Italian-born population, or by contrast, being a migrant may point  
16 physicians to a prompt TB diagnosis.<sup>13</sup> This finding is consistent with other studies.<sup>13 19</sup>

17  
18 Female gender was associated with shorter HSD, in contrast with other studies.<sup>4</sup> In general, female patients  
19 are reported to encounter greater barriers (financial, physical, and health literacy) for appropriate medical  
20 care and treatment. Further investigations on possible confounders should be considered.  
21

22  
23 In line with others,<sup>4 30 36 37</sup> a first healthcare contact in hospital, was strongly associated with shorter HSD,  
24 while referring to GP was a risk factor for longer HSD. A combination of several factors, may explain this  
25 result: lack of TB suspicion among primary care providers in low-endemic countries; seeking assistance in  
26 hospital for patients at higher risk of TB (e.g. migrants from endemic countries) and/or with more severe TB  
27 disease who are thus investigated faster; availability and easier access to diagnostic tests and specialists  
28 within the hospital.<sup>24</sup>  
29

30  
31 Furthermore, repeated visits, especially with different healthcare workers in different health facilities, has  
32 been retrieved as predictor of HSD in other studies,<sup>15 17 38-40</sup> however we did not find this association in the  
33 final model. It has been reported that generally, patients see different healthcare providers in case of poor  
34 clinical suspicions of signs and symptoms, failure to request for proper investigations, refer patients to  
35 specialised TB centre for further investigations,<sup>41</sup> or when they receive inappropriate treatment that can  
36 modify the clinical picture of the disease.<sup>40</sup>  
37  
38  
39  
40  
41  
42  
43  
44  
45  
46  
47  
48  
49  
50  
51  
52  
53  
54  
55  
56

1  
2  
3 The association of HSD and TOTD with previous unspecific treatment is in agreement with other results.<sup>13 24</sup>

4 This is of a particular concern in the current global epidemiological scenario where antimicrobial resistance  
5 is rapidly developing and spreading and a more prudent use of antimicrobials is urgently needed, by for  
6 instance, limiting the use of empirical antibiotics in patients with respiratory symptoms.<sup>24</sup> Training GP for  
7 the early identification of signs and symptoms and prompt referral of suspected cases to TB diagnosis and  
8 treatment health centres is essential.

9  
10 Finally, other factors associated with shorter TOTD were presenting sputum with blood and having visits by  
11 the same provider. Sputum with blood is usually recognised as a late sign of TB, thus patients with severe  
12 symptoms are immediately suspected for TB. Intuitively, having visits with the same provider might reduce  
13 repetition of examinations and misdiagnosis.

14  
15 Our study has some limitations, some of them specific to the cross-sectional study design. A selection bias  
16 should be considered. In fact, the mediator was not often available in hospitals, thus, foreign-born patients  
17 recently arrived in Italy, may have experienced difficulties during the interview, resulting in refusal or in  
18 missing data. In any case, no difference has been detected for country of birth among responders and non-  
19 responders and the completion rate for the questions included in the analyses was at least 80%. Also, the low  
20 education level of the overall population may have contributed to an information bias. However, since a  
21 higher frequency of low educational level was shown in foreign-born patients than in patients born in Italy, a  
22 differential misclassification could be supposed and thus the direction of the bias is unpredictable.  
23 Furthermore, as the onset date of symptoms was self-reported, it may have been affected by recall bias that  
24 could have occurred heterogeneously in the whole sample. Another limitation is that data on HIV status and  
25 other risk factors (e.g. alcohol and drug use and detention status) were not available for the vast majority of  
26 patients.

27  
28 In the present study, several aspects have been investigating as key factors contributing to PD and HSD in  
29 TB patients. However, further studies addressing other components of delays<sup>6 30 42</sup> may be necessary to  
30 understand all factors that are closely associated with delay in the diagnosis and treatment of TB.  
31 Furthermore, in our regression model we did not take into account for the potential collinearity of  
32  
33  
34  
35  
36  
37  
38  
39  
40  
41  
42  
43  
44  
45  
46  
47  
48  
49  
50  
51  
52  
53  
54  
55  
56  
57  
58  
59  
60

1  
2  
3 explanatory variables, which could explain complex relationship involving several risk factors at the same  
4 time, for example the use of unspecific antibiotics and multiple visits with healthcare providers

5  
6 A possible approach to combine the relevant variables into summary scores or indexes and assesses the  
7 relationship of these with the outcome of interest should be explored.  
8  
9

10 This is the first multiregional cross-sectional study, conducted in Italy, which investigated the association of  
11 several factors with PD, HSD and TOTD delay in pulmonary TB patients. It provides new evidence which  
12 can be addressed through tailored actions, in order to reduce the burden of TB in Italy. Furthermore, the  
13 prospective collection of data in four Italian regions, using a multilingual standardised questionnaire and the  
14 adjustment for confounding factors with logistic regression analysis are among the strengths of the present  
15 study.  
16  
17  
18  
19  
20  
21

22 In conclusion, this study detected several modifiable factors associated with longer delay in TB patients, both  
23 attributable to patients and health system service. Interventions designed to empower the general population  
24 and stakeholders, by increasing knowledge and awareness and screening of active TB in migrants upon  
25 arrival are key actions to reduce PD and HSD and achieve TB control.<sup>43</sup> Strategies should mainly target  
26 alleviating stigma around TB, improving TB-related health literacy and access to care among the general  
27 population, education of GP, earlier referral of TB suspects to the hospital, where appropriate investigations  
28 for final diagnosis are readily available, and limiting the use of unspecific treatment in patients with  
29 respiratory symptoms.  
30  
31  
32  
33  
34  
35  
36  
37  
38  
39  
40  
41  
42  
43  
44  
45  
46  
47  
48  
49  
50  
51  
52  
53  
54  
55  
56  
57  
58  
59  
60

## ACKNOWLEDGEMENTS

The Authors are grateful to all dedicated staff of the participating hospitals: Silvana Adinolfi, Alessandra Bergamasco, Giulia Bertoli, Gaetano Brindicci, Daniela Castronuovo, Pierpaolo Ciavarella, Vanessa Cozza, Consuelo Geraci, Anna Giannelli, Nicola Grandi, Giuliana Guadagnino, Maria Elena Locatelli, Viviana Marras, Carmen Martino, Alice Medaglia, Maria Cristina Monni, Alessio Pampaloni, Simona Piacenti, Piero Pirina, Rachele Russo, Teresa Scarabaggio, Fabio Sultani, Iulia Adelina Turiac.

## COLLABORATORS

CCM 2013 TB network: Alessandro Bisbano, Celestino Bonura, Bruno Cacopardo, Maria Giovanna Cappelli, Antonio Cascio, Francesco Cesario, Paola Di Carlo, Anna Di Taranto, Francesca Fortunato, Antonina Franco, Anna Grimaldi, Carmelo Iacobello, Maria Clara La Rosa, Valentina Mascaro, Andrea Maugeri, Arturo Montineri, Salvatore Nisticò, Cecilia Occhino, Grazia Pantò, Maria Polimeni, Vincenzo Portelli, Graziano Provenzano, Pasquale Quartararo, Francesco Quintieri, Salvatore Requirez, Francesca Savalli, Consiglia Venitucci, Maria Teresa Zorzetto, Rossella Zucco.

All CCM 2013 TB network collaborators supervised and coordinated at the hospital level patients' enrolment and data collection.

## COMPETING INTERESTS

The Authors declare that they have no competing interests.

## ETHICS

All procedures followed were in accordance with the Helsinki Declaration of 1975, as revised in 2008.

Informed consent was obtained from all patients for being included in the study.

## DATA SHARING STATEMENT

No additional data available

## FUNDING SOURCE

The project entitled "*Valutazione dei determinanti di ritardo nell'accesso ai servizi sanitari, nella diagnosi e nel trattamento della tubercolosi polmonare (PTB) in popolazioni vulnerabili. Valutazione dell'impatto sull'epidemiologia locale e sulla prevalenza di resistenza/multiresistenza ai farmaci antitubercolari* -

"Assessment of determinants of delay in healthcare access for the diagnosis and treatment of PTB in

1  
2  
3 vulnerable populations. Assessment of the impact on the local epidemiology and on the prevalence of  
4 antituberculosis drug resistance/multiresistance” was approved and financially supported by the Italian  
5 Ministry of Health (Centro nazionale per la prevenzione e il Controllo delle Malattie, CCM 2013). The  
6 funding source had no role in any phase of the development of the current study.  
7  
8  
9

### 10 **CONTRIBUTORSHIP**

11  
12 A Agodi, C Nobile, R Prato and G Sotgiu conceived, designed and supervised the study and coordinated  
13 regional data collection. A Casuccio and F Vitale coordinated the project. M Barchitta and A Quattrocchi  
14 designed the questionnaire and managed data collection at the central level. A Quattrocchi performed the  
15 statistical analysis and wrote the first draft of the manuscript. A Agodi, M Barchitta and A Quattrocchi  
16 interpreted the results and wrote the advanced version of the manuscript.  
17  
18  
19  
20  
21

22 All Authors critically reviewed the manuscript and approved the final version.  
23  
24  
25  
26  
27  
28  
29  
30  
31  
32  
33  
34  
35  
36  
37  
38  
39  
40  
41  
42  
43  
44  
45  
46  
47  
48  
49  
50  
51  
52  
53  
54  
55  
56  
57  
58  
59  
60

**REFERENCES**

1. Migliori GB, Zellweger JP, Abubakar I, et al. European union standards for tuberculosis care. *Eur Respir J* 2012;39(4):807-19. doi: 10.1183/09031936.00203811
2. Tuberculosis Coalition for Technical Assistance. International Standards for Tuberculosis Care (ISTC), second edition. The Hague, 2009
3. World Health Organization. The End TB Strategy. Global strategy and targets for tuberculosis prevention, care and control after 2015. WHO; Geneva, 2014. <http://www.who.int/tb/strategy/en/> (accessed 11 Mar 2017)
4. Cai J, Wang X, Ma A, et al. Factors associated with patient and provider delays for tuberculosis diagnosis and treatment in Asia: a systematic review and meta-analysis. *PLoS One* 2015;10(3):e0120088. doi: 10.1371/journal.pone.0120088
5. Gebreegziabher SB, Bjune GA, Yimer SA. Total Delay Is Associated with Unfavorable Treatment Outcome among Pulmonary Tuberculosis Patients in West Gojjam Zone, Northwest Ethiopia: A Prospective Cohort Study. *PLoS One* 2016;11(7):e0159579. doi: 10.1371/journal.pone.0159579
6. Storla DG, Yimer S, Bjune GA. A systematic review of delay in the diagnosis and treatment of tuberculosis. *BMC Public Health* 2008;8:15. doi: 10.1186/1471-2458-8-15
7. Bjune G. Tuberculosis in the 21st century: an emerging pandemic? *Nor Epidemiol* 2005;15(2):133–139
8. Bassili A, Seita A, Baghdadi S, et al. Diagnostic and treatment delay in tuberculosis in 7 countries of the Eastern Mediterranean region. *Infect Dis Clin Pract* 2008;16:23.
9. Vassall A, Chechulin Y, Raykhert I, et al. Reforming tuberculosis control in Ukraine: results of pilot projects and implications for the national scale-up of DOTS. *Health Policy Plan* 2009;24(1):55-62. doi: 10.1093/heapol/czn045
10. Yang WT, Gounder CR, Akande T, et al. Barriers and delays in tuberculosis diagnosis and treatment services: does gender matter? *Tuberc Res Treat* 2014;2014:461935. doi: 10.1155/2014/461935

- 1  
2  
3 11. USAID and TBCARE II. Study Report. Reducing TB Delays: Evaluating the Frequency and Causes of  
4  
5 Delays in Bangladesh and Swaziland. 2014. [http://tbcare2.org/content/reducing-tb-delays-evaluating-](http://tbcare2.org/content/reducing-tb-delays-evaluating-frequency-and-causes-delays-bangladesh-and-swaziland)  
6  
7 [frequency-and-causes-delays-bangladesh-and-swaziland](http://tbcare2.org/content/reducing-tb-delays-evaluating-frequency-and-causes-delays-bangladesh-and-swaziland) (accessed 29 Nov 2016).
- 8  
9 12. Noppert GA, Kubale JT, Wilson ML. Analyses of infectious disease patterns and drivers largely lack  
10  
11 insights from social epidemiology: contemporary patterns and future opportunities. *J Epidemiol*  
12  
13 *Community Health* 2017;71(4):350-55. doi: 10.1136/jech-2016-207967
- 14  
15 13. Pezzotti P, Pozzato S, Ferroni E, et al. Delay in diagnosis of pulmonary tuberculosis: A survey in the  
16  
17 Lazio region, Italy. *Epidemiol Biostat Public Health* 2015;12:1-10.
- 18  
19 14. Barniol J, Niemann S, Louis VR, et al. Transmission dynamics of pulmonary tuberculosis between  
20  
21 autochthonous and immigrant sub-populations. *BMC Infect Dis* 2009;9:197. doi: 10.1186/1471-2334-9-  
22  
23 197
- 24  
25 15. World Health Organization. Diagnostic and treatment delay in tuberculosis. WHO; Geneva, 2006.  
26  
27 <http://applications.emro.who.int/dsaf/dsa710.pdf> (accessed 26 Apr 2014).
- 28  
29 16. USAID. Reducing Delays in TB Diagnosis: Data Collection Tools to evaluate the cause and frequency of  
30  
31 TB delays. 2011.  
32  
33 [http://www.challengetb.org/publications/tools/ua/Data\\_Collection\\_Tool\\_TB\\_Patient\\_Delay.pdf](http://www.challengetb.org/publications/tools/ua/Data_Collection_Tool_TB_Patient_Delay.pdf) (accessed  
34  
35 26 Apr 2014)
- 36  
37 17. Sreeramareddy CT, Qin ZZ, Satyanarayana S, et al. Delays in diagnosis and treatment of pulmonary  
38  
39 tuberculosis in India: a systematic review. *Int J Tuberc Lung Dis* 2014;18(3):255-66. doi:  
40  
41 10.5588/ijtld.13.0585
- 42  
43 18. Gagliotti C, Resi D, Moro ML. Delay in the treatment of pulmonary TB in a changing demographic  
44  
45 scenario. *Int J Tuberc Lung Dis* 2006;10(3):305-9.
- 46  
47 19. Saldana L, Abid M, McCarthy N, et al. Factors affecting delay in initiation of treatment of tuberculosis in  
48  
49 the Thames Valley, UK. *Public Health* 2013;127(2):171-7. doi: 10.1016/j.puhe.2012.11.010
- 50  
51 20. World Health Organization. Global tuberculosis report 2016. WHO; Geneva 2016.  
52  
53 [http://www.who.int/tb/publications/global\\_report/en/](http://www.who.int/tb/publications/global_report/en/) (accessed 28 Jan 2017).

21. Ingrosso L, Vescio F, Giuliani M, et al. Risk factors for tuberculosis in foreign-born people (FBP) in Italy: a systematic review and meta-analysis. *PLoS One* 2014;9(4):e94728. doi: 10.1371/journal.pone.0094728
22. Mor Z, Kolb H, Lidji M, et al. Tuberculosis diagnostic delay and therapy outcomes of non-national migrants in Tel Aviv, 1998-2008. *Euro Surveill* 2013;18(12)
23. Hollo V, Beaute J, Kodmon C, et al. Tuberculosis notification rate decreases faster in residents of native origin than in residents of foreign origin in the EU/EEA, 2010 to 2015. *Euro Surveill* 2017;22(12) doi: 10.2807/1560-7917.ES.2017.22.12.30486
24. Tattevin P, Che D, Fraisse P, et al. Factors associated with patient and health care system delay in the diagnosis of tuberculosis in France. *Int J Tuberc Lung Dis* 2012;16(4):510-5. doi: 10.5588/ijtld.11.0420
25. Farah MG, Rygh JH, Steen TW, et al. Patient and health care system delays in the start of tuberculosis treatment in Norway. *BMC Infect Dis* 2006;6:33. doi: 10.1186/1471-2334-6-33
26. Jurcev-Savicevic A, Mulic R, Kozul K, et al. Health system delay in pulmonary tuberculosis treatment in a country with an intermediate burden of tuberculosis: a cross-sectional study. *BMC Public Health* 2013;13:250. doi: 10.1186/1471-2458-13-250
27. Gebreegziabher SB, Bjune GA, Yimer SA. Patients' and health system's delays in the diagnosis and treatment of new pulmonary tuberculosis patients in West Gojjam Zone, Northwest Ethiopia: a cross-sectional study. *BMC Infect Dis* 2016;16(1):673. doi: 10.1186/s12879-016-1995-z
28. Lambert ML, Van der Stuyft P. Delays to tuberculosis treatment: shall we continue to blame the victim? *Trop Med Int Health* 2005;10(10):945-6. doi: 10.1111/j.1365-3156.2005.01485.x
29. Leutscher P, Madsen G, Erlandsen M, et al. Demographic and clinical characteristics in relation to patient and health system delays in a tuberculosis low-incidence country. *Scand J Infect Dis* 2012;44(1):29-36. doi: 10.3109/00365548.2011.608081
30. Li Y, Ehiri J, Tang S, et al. Factors associated with patient, and diagnostic delays in Chinese TB patients: a systematic review and meta-analysis. *BMC Med* 2013;11:156. doi: 10.1186/1741-7015-11-156
31. Maciel EL, Golub JE, Peres RL, et al. Delay in diagnosis of pulmonary tuberculosis at a primary health clinic in Vitoria, Brazil. *Int J Tuberc Lung Dis* 2010;14(11):1403-10.

- 1  
2  
3 32. Belkina TV, Khojiev DS, Tillyashaykhov MN, et al. Delay in the diagnosis and treatment of pulmonary  
4 tuberculosis in Uzbekistan: a cross-sectional study. *BMC Infect Dis* 2014;14:624. doi: 10.1186/s12879-  
5 014-0624-y  
6  
7  
8  
9 33. Deponti GN, Silva DR, Coelho AC, et al. Delayed diagnosis and associated factors among new  
10 pulmonary tuberculosis patients diagnosed at the emergency department of a tertiary care hospital in  
11 Porto Alegre, South Brazil: a prospective patient recruitment study. *BMC Infect Dis* 2013;13:538. doi:  
12 10.1186/1471-2334-13-538  
13  
14  
15  
16 34. Asch S, Leake B, Anderson R, et al. Why do symptomatic patients delay obtaining care for tuberculosis?  
17 *Am J Respir Crit Care Med* 1998;157(4 Pt 1):1244-8. doi: 10.1164/ajrccm.157.4.9709071  
18  
19  
20 35. Abarca Tomas B, Pell C, Bueno Cavanillas A, et al. Tuberculosis in migrant populations. A systematic  
21 review of the qualitative literature. *PLoS One* 2013;8(12):e82440. doi: 10.1371/journal.pone.0082440  
22  
23  
24 36. Sreeramareddy CT, Panduru KV, Menten J, et al. Time delays in diagnosis of pulmonary tuberculosis: a  
25 systematic review of literature. *BMC Infect Dis* 2009;9:91. doi: 10.1186/1471-2334-9-91  
26  
27  
28 37. Diez M, Bleda MJ, Alcaide J, et al. Determinants of health system delay among confirmed tuberculosis  
29 cases in Spain. *Eur J Public Health* 2005;15(4):343-9. doi: 10.1093/eurpub/cki010  
30  
31  
32 38. Osei E, Akweongo P, Binka F. Factors associated with DELAY in diagnosis among tuberculosis patients  
33 in Hohoe Municipality, Ghana. *BMC Public Health* 2015;15:721. doi: 10.1186/s12889-015-1922-z  
34  
35  
36 39. Takarinda KC, Harries AD, Nyathi B, et al. Tuberculosis treatment delays and associated factors within  
37 the Zimbabwe national tuberculosis programme. *BMC Public Health* 2015;15:29. doi: 10.1186/s12889-  
38 015-1437-7  
39  
40  
41  
42 40. Sabawoon W, Sato H, Kobayashi Y. Delay in the treatment of pulmonary tuberculosis: a report from  
43 Afghanistan. *Environ Health Prev Med* 2012;17(1):53-61. doi: 10.1007/s12199-011-0219-9  
44  
45  
46 41. Kiuwua MS, Charles K, Harriet MK. Patient and health service delay in pulmonary tuberculosis patients  
47 attending a referral hospital: a cross-sectional study. *BMC Public Health* 2005;5:122. doi: 10.1186/1471-  
48 2458-5-122  
49  
50  
51  
52  
53  
54  
55  
56  
57  
58  
59  
60

- 1  
2  
3 42. Getnet F, Demissie M, Assefa N, et al. Delay in diagnosis of pulmonary tuberculosis in low-and middle-  
4 income settings: systematic review and meta-analysis. *BMC Pulm Med* 2017;17(1):202. doi:  
5 10.1186/s12890-017-0551-y  
6  
7  
8 43. Pareek M, Greenaway C, Noori T, et al. The impact of migration on tuberculosis epidemiology and  
9 control in high-income countries: a review. *BMC Med* 2016;14:48. doi: 10.1186/s12916-016-0595-5  
10  
11  
12  
13  
14  
15  
16  
17  
18  
19  
20  
21  
22  
23  
24  
25  
26  
27  
28  
29  
30  
31  
32  
33  
34  
35  
36  
37  
38  
39  
40  
41  
42  
43  
44  
45  
46  
47  
48  
49  
50  
51  
52  
53  
54  
55  
56  
57  
58  
59  
60

For peer review only

## Tables

Table 1. Patients' characteristics

|                                                 |                                | All<br>% (N) | Italian-born<br>% (N) | Foreign-born<br>% (N) | p*               | Males<br>% (N) | Females<br>% (N) | p*           |
|-------------------------------------------------|--------------------------------|--------------|-----------------------|-----------------------|------------------|----------------|------------------|--------------|
| <b>Age (mean)</b>                               |                                | 40.7 (246)   | 48.7 (109)            | 34.3(137)             | <b>&lt;0.001</b> | 41.0 (157)     | 40.1 (89)        | 0.941        |
| <b>Country of birth<br/>(n=253)</b>             | Italy                          | 44.3 (112)   | -                     | -                     | -                | 42.2 (68)      | 47.8 (44)        | 0.389        |
|                                                 | Abroad                         | 55.7 (141)   | -                     | -                     |                  | 57.8 (93)      | 52.2 (48)        |              |
| <b>Gender<br/>(n=253)</b>                       | Males                          | 63.6 (161)   | 60.7 (68)             | 66.0 (93)             | 0.389-           | -              | -                | -            |
|                                                 | Females                        | 36.4 (92)    | 39.3 (44)-            | 34.0 (48)-            |                  | -              | -                |              |
| <b>Education level<br/>(n=251)</b>              | Low                            | 72.5 (182)   | 63.6 (70)             | 79.4 (112)            | <b>0.005</b>     | 70.8 (114)     | 75.6 (68)        | 0.419        |
|                                                 | High                           | 27.5 (69)    | 36.4 (40)             | 20.6 (29)             |                  | 29.2 (47)      | 24.4 (22)        |              |
| <b>Residence<br/>(n=240)</b>                    | Homeless/prison/ Nursing homes | 20.8 (50)    | 3.7 (4)               | 34.8 (46)             | <b>&lt;0.001</b> | 26.6 (41)      | 10.5 (9)         | <b>0.003</b> |
|                                                 | Apartment (own or rented)      | 79.2 (190)   | 96.3 (104)            | 65.2 (86)             |                  | 73.4 (113)     | 89.5 (77)        |              |
| <b>Employment<br/>(n=241)</b>                   | Unemployed or occasional work  | 42.7 (103)   | 14.3 (15)             | 64.7 (88)             | <b>&lt;0.001</b> | 47.1 (73)      | 34.9 (30)        | <b>0.019</b> |
|                                                 | Permanent job                  | 26.6 (64)    | 33.3 (35)             | 21.3 (29)             |                  | 28.4 (44)      | 23.3 (20)        |              |
|                                                 | Housewife/retired/student      | 30.7 (74)    | 52.4 (55)             | 14.0 (19)             |                  | 24.5 (38)      | 41.9 (36)        |              |
| <b>Smoking habits<br/>(n=236)</b>               | Current                        | 27.2 (67)    | 29.9 (32)             | 25.2 (35)             | 0.409            | 32.5 (51)      | 18.0 (16)        | <b>0.014</b> |
|                                                 | Never/former                   | 72.8 (179)   | 70.1 (75)             | 74.8 (104)            |                  | 67.5 (106)     | 82.0 (73)        |              |
| <b>Alcohol abuse<sup>^</sup><br/>(n=248)</b>    | Yes                            | 6.9 (17)     | 6.3 (7)               | 7.3 (10)              | 0.758            | 10.1 (16)      | 1.1 (1)          | <b>0.007</b> |
|                                                 | No                             | 93.1 (231)   | 93.7 (104)            | 92.7 (127)            |                  | 89.9 (142)     | 98.9 (89)        |              |
| <b>Chronic diseases<sup>†</sup><br/>(n=251)</b> | Yes                            | 28.3 (71)    | 39.1 (43)             | 19.9 (28)             | <b>0.001</b>     | 31.2 (50)      | 23.1 (21)        | 0.167        |
|                                                 | No                             | 71.7 (180)   | 60.9 (67)             | 80.1 (113)            |                  | 68.8 (110)     | 76.9 (70)        |              |
| <b>Stigma<br/>(n=252)</b>                       | >median                        | 48.4 (122)   | 41.4 (46)             | 53.9 (76)             | <b>0.049</b>     | 51.6 (83)      | 42.9 (39)        | 0.185        |
|                                                 | ≤median                        | 51.6 (130)   | 58.6 (65)             | 46.1 (65)             |                  | 48.4 (78)      | 57.1 (52)        |              |
| <b>Integration index (mean)<sup>°</sup></b>     |                                | 4.4 (141)    | -                     | -                     | -                | 4.1 (93)       | 5.1 (48)         | <b>0.008</b> |
| <b>Years in Italy (mean)<sup>°</sup></b>        |                                | 7.1 (127)    | -                     | -                     | -                | 6.6 (85)       | 8.2 (42)         | 0.242        |
| <b>Patient Delay<br/>(n=231)</b>                | Median (IQR)                   | 30 (8-60)    | 15 (7-60)             | 30 (14-60)            | -                | 30 (10-60)     | 28 (7-60)        | -            |
|                                                 | (>30 days)                     | 64.5 (149)   | 29.1 (30)             | 40.6 (52)             | 0.069            | 37.2 (55)      | 32.5 (27)        | 0.480        |
| <b>Health system delay<br/>(n=225)</b>          | Median (IQR)                   | 11 (5-33)    | 21 (7.25-61)          | 8 (4-22)              | -                | 14.5 (6-37)    | 8 (4-31)         | -            |
|                                                 | (>11 days)                     | 48.1 (111)   | 61.5 (64)             | 37.0 (47)             | <b>&lt;0.001</b> | 55.4 (82)      | 34.9 (29)        | <b>0.008</b> |
| <b>Diagnostic delay<br/>(n=225)</b>             | Median (IQR)                   | 7 (3-30)     | 15 (4.75-60)          | 7 (3-15)              | -                | 14 (4-30)      | 6 (3-28)         | -            |
|                                                 | (>7 days)                      | 49.3 (111)   | 64.7 (66)             | 36.6 (45)             | <b>&lt;0.001</b> | 55.9 (81)      | 37.5 (30)        | <b>0.008</b> |

|                                    |                            |                          |                          |                         |            |                         |                          |            |
|------------------------------------|----------------------------|--------------------------|--------------------------|-------------------------|------------|-------------------------|--------------------------|------------|
| <b>Treatment delay<br/>(n=219)</b> | Median (IQR)<br>(>2 days)  | 2 (1-4)<br>38.4 (84)     | 2 (1-4)<br>38.4 (38)     | 2 (1-4)<br>38.3 (46)    | -<br>0.994 | 2 (1-5)<br>40.9 (56)    | 2 (1-4)<br>34.1 (28)     | -<br>0.322 |
| <b>Total delay<br/>(n=208)</b>     | Median (IQR)<br>(>45 days) | 45 (25-121)<br>49.5 (97) | 53 (25-123)<br>56.0 (50) | 40 (25-97)<br>44.0 (47) | -<br>0.091 | 47 (26-99)<br>66.0 (64) | 41 (16-120)<br>34.0 (33) | -<br>0.525 |

\*p-values <0.05 are indicated in bold

^ ≥4 times a week

° only in foreign-born patients

† HIV/AIDS, diabetes, chronic obstructive pulmonary disease, disability, renal failure, cardiovascular disease

For peer review only

**Table 2. Risk analysis for patient delay (Univariate and logistic regression analysis)**

|                                                                            | PD<br>>30 days<br>% | OR<br>95%CI               | p*               | aOR<br>95%CI               | p*               |
|----------------------------------------------------------------------------|---------------------|---------------------------|------------------|----------------------------|------------------|
| <b>Foreign-born patients</b>                                               |                     |                           |                  |                            |                  |
| No <sup>^</sup>                                                            | 29.1                | 1.00                      | 0.069            | -                          | -                |
| Yes                                                                        | 40.6                | 1.67 (0.96 - 2.89)        |                  |                            |                  |
| <b>Do you know what TB is?</b>                                             |                     |                           | 0.091            | -                          | -                |
| No <sup>^</sup>                                                            | 27.8                | 1.00                      |                  |                            |                  |
| Yes                                                                        | 39.1                | 1.66 (0.92 - 3.00)        |                  |                            |                  |
| <b>Do you know how TB is diagnosed?</b>                                    |                     |                           | 0.051            | -                          | -                |
| No <sup>^</sup>                                                            | 28.7                | 1.00                      |                  |                            |                  |
| Yes                                                                        | 41.3                | 1.75 (0.99 - 3.07)        |                  |                            |                  |
| <b>Stigma</b>                                                              |                     |                           | <b>0.001</b>     |                            | <b>0.034</b>     |
| < median <sup>^</sup>                                                      | 24.8                | <b>1.00</b>               |                  | <b>1.00</b>                |                  |
| > median                                                                   | 46.5                | <b>2.64 (1.51 - 4.61)</b> |                  | <b>2.30 (1.06 - 4.98)</b>  |                  |
| <b>Pay for transportation to reach the health centre</b>                   |                     |                           | <b>&lt;0.001</b> |                            | <b>0.012</b>     |
| No <sup>^</sup>                                                            | 23.5                | <b>1.00</b>               |                  | <b>1.00</b>                |                  |
| Yes                                                                        | 49.4                | <b>3.18 (1.77 - 5.73)</b> |                  | <b>2.66 (1.24 - 5.74)</b>  |                  |
| <b>Did you think you had TB?</b>                                           |                     |                           | 0.090            | -                          | -                |
| No <sup>^</sup>                                                            | 33.8                | 1.00                      |                  |                            |                  |
| Yes                                                                        | 52.4                | 2.15 (0.87 - 5.31)        |                  |                            |                  |
| <b>Was the health centre where you sought care near your living place?</b> |                     |                           | <b>0.018</b>     |                            | <b>0.037</b>     |
| Yes <sup>^</sup>                                                           | 21.9                | 1.00                      |                  | <b>1.00</b>                |                  |
| No                                                                         | 39.2                | 2.30 (1.15 - 4.62)        |                  | <b>2.46 (1.05 - 5.74)</b>  |                  |
| <b>Weight loss</b>                                                         |                     |                           | <b>&lt;0.001</b> |                            | <b>&lt;0.001</b> |
| No <sup>^</sup>                                                            | 22.5                | <b>1.00</b>               |                  | <b>1.00</b>                |                  |
| Yes                                                                        | 56.2                | <b>4.41 (2.48 - 7.83)</b> |                  | <b>4.66 (2.16 - 10.05)</b> |                  |
| <b>Tiredness/weakness</b>                                                  |                     |                           | <b>0.001</b>     | -                          | -                |
| No <sup>^</sup>                                                            | 25.8                | <b>1.00</b>               |                  |                            |                  |
| Yes                                                                        | 45.9                | <b>2.44 (1.40 - 4.25)</b> |                  |                            |                  |
| <b>Chest pain</b>                                                          |                     |                           | <b>0.026</b>     |                            | <b>0.031</b>     |
| No <sup>^</sup>                                                            | 31.4                | <b>1.00</b>               |                  | <b>1.00</b>                |                  |
| Yes                                                                        | 47.5                | <b>1.97 (1.08 - 3.61)</b> |                  | <b>2.67 (1.24 - 6.49)</b>  |                  |
| <b>Chronic diseases</b>                                                    |                     |                           | <b>0.009</b>     | -                          | -                |
| No <sup>^</sup>                                                            | 29.6                | <b>1.00</b>               |                  |                            |                  |
| Yes                                                                        | 47.8                | <b>2.17 (1.21 - 3.90)</b> |                  |                            |                  |

\*p-values <0.05 are indicated in bold

<sup>^</sup> reference category

PD: patient delay; OR: odd ratio; a: adjusted; CI: confidence interval; TB: tuberculosis

**Table 3. Risk analysis for health system delay (Univariate and logistic regression analysis)**

|                                                                                       | HSD<br>>11 days<br>% | OR<br>95%CI               | p*               | aOR<br>95%CI              | p*               |
|---------------------------------------------------------------------------------------|----------------------|---------------------------|------------------|---------------------------|------------------|
| <b>Foreign-born patients</b>                                                          |                      |                           |                  |                           |                  |
| No <sup>^</sup>                                                                       | 61.5                 | 1.00                      | <b>&lt;0.001</b> | 1.00                      | <b>0.024</b>     |
| Yes                                                                                   | 37.0                 | <b>0.37 (0.22 - 0.63)</b> |                  | <b>0.50 (0.27 - 0.91)</b> |                  |
| <b>Age</b>                                                                            |                      |                           | 0.1              | -                         | -                |
| > median                                                                              | 43.7                 | 1.00                      |                  |                           |                  |
| ≤median                                                                               | 54.6                 | 1.55 (0.92 - 2.62)        |                  |                           |                  |
| <b>Gender</b>                                                                         |                      |                           | <b>0.003</b>     |                           | <b>&lt;0.001</b> |
| Male <sup>^</sup>                                                                     | 55.4                 | 1.00                      |                  | 1.00                      |                  |
| Female                                                                                | 34.9                 | <b>0.43 (0.25 - 0.75)</b> |                  | <b>0.28 (0.15 - 0.53)</b> |                  |
| <b>First visit with GP</b>                                                            |                      |                           | <b>&lt;0.001</b> | -                         |                  |
| No <sup>^</sup>                                                                       | 39.9                 | 1.00                      |                  |                           |                  |
| Yes                                                                                   | 68.7                 | <b>3.30 (1.80 - 6.06)</b> |                  |                           |                  |
| <b>First visit at hospital</b>                                                        |                      |                           | <b>&lt;0.001</b> |                           | <b>0.001</b>     |
| No <sup>^</sup>                                                                       | 64.6                 | 1.00                      |                  | 1.00                      |                  |
| Yes                                                                                   | 35.7                 | <b>0.30 (0.17 - 0.53)</b> |                  | <b>0.35 (0.18 - 0.66)</b> |                  |
| <b>After first visit, did you seek treatment from somewhere else?</b>                 |                      |                           | <b>&lt;0.001</b> | -                         | -                |
| No <sup>^</sup>                                                                       | 35.1                 | 1.00                      |                  |                           |                  |
| Yes                                                                                   | 66.7                 | <b>3.70 (2.12 - 6.44)</b> |                  |                           |                  |
| <b>Cough &gt; 3 weeks</b>                                                             |                      |                           | <b>0.036</b>     | -                         | -                |
| No <sup>^</sup>                                                                       | 57.7                 | 1.00                      |                  |                           |                  |
| Yes                                                                                   | 43.1                 | <b>0.56 (0.32 - 0.97)</b> |                  |                           |                  |
| <b>Dizziness</b>                                                                      |                      |                           | <b>0.040</b>     |                           | <b>0.023</b>     |
| No <sup>^</sup>                                                                       | 49.8                 | 1.00                      |                  | 1.00                      |                  |
| Yes                                                                                   | 21.4                 | <b>0.28 (0.75 - 1.01)</b> |                  | <b>0.18 (0.04 - 0.78)</b> |                  |
| <b>Prior unspecific treatment</b>                                                     |                      |                           | <b>&lt;0.001</b> |                           | <b>0.012</b>     |
| No <sup>^</sup>                                                                       | 34.1                 | 1.00                      |                  | 1.00                      |                  |
| Yes                                                                                   | 57.1                 | <b>2.58 (1.49 - 4.46)</b> |                  | <b>2.25 (1.19 - 4.25)</b> |                  |
| <b>Did you have repeated visits with different providers in a different facility?</b> |                      |                           | <b>&lt;0.001</b> | -                         | -                |
| No <sup>^</sup>                                                                       | 37.3                 | 1.00                      |                  |                           |                  |
| Yes                                                                                   | 62.8                 | <b>2.84 (1.61 - 5.01)</b> |                  |                           |                  |

\*p-values <0.05 are indicated in bold

<sup>^</sup> reference category

HSD: health system delay; OR: odd ratio; a: adjusted; CI: confidence interval; GP: general practitioner;

**Table 4. Risk analysis for total delay (Univariate and logistic regression analysis)**

|                                                             | <b>TOTD<br/>&gt;45 days<br/>%</b> | <b>OR<br/>95%CI</b>       | <b>p*</b>    | <b>aOR<br/>95%CI</b>      | <b>p*</b>    |
|-------------------------------------------------------------|-----------------------------------|---------------------------|--------------|---------------------------|--------------|
| <b>Foreign-born patients</b>                                |                                   |                           | 0.091        | -                         | -            |
| No <sup>^</sup>                                             | 56.0                              | 1.00                      |              |                           |              |
| Yes                                                         | 44.0                              | 0.62 (0.35 – 1.08)        |              |                           |              |
| <b>Do you know what TB is?</b>                              |                                   |                           | <b>0.012</b> | -                         | -            |
| No <sup>^</sup>                                             | 37.1                              | 1.00                      |              |                           |              |
| Yes                                                         | 55.8                              | <b>2.14 (1.18 – 3.88)</b> |              |                           |              |
| <b>Pay for transportation</b>                               |                                   |                           | <b>0.004</b> |                           | <b>0.047</b> |
| No <sup>^</sup>                                             | 40.5                              | 1.00                      |              | 1.00                      |              |
| Yes                                                         | 62.3                              | <b>2.43 (1.32 – 4.46)</b> |              | <b>2.10 (1.01 – 4.35)</b> |              |
| <b>Close distance of the first visit place</b>              |                                   |                           | <b>0.003</b> |                           | <b>0.006</b> |
| Yes <sup>^</sup>                                            | 32.8                              | 1.00                      |              | 1.00                      |              |
| No                                                          | 56.9                              | <b>2.71 (1.38 – 5.31)</b> |              | <b>3.09 (1.38 – 6.90)</b> |              |
| <b>Cough &gt; 3 weeks</b>                                   |                                   |                           | <b>0.038</b> | -                         | -            |
| No <sup>^</sup>                                             | 60.3                              | 1.00                      |              |                           |              |
| Yes                                                         | 44.5                              | <b>0.53 (0.29– 0.97)</b>  |              |                           |              |
| <b>Sputum with blood</b>                                    |                                   |                           | <b>0.005</b> |                           | <b>0.001</b> |
| No <sup>^</sup>                                             | 53.5                              | 1.00                      |              | 1.00                      |              |
| Yes                                                         | 25.0                              | <b>0.29 (0.12– 0.72)</b>  |              | <b>0.12 (0.03– 0.43)</b>  |              |
| <b>Weight loss</b>                                          |                                   |                           | <b>0.004</b> |                           | <b>0.003</b> |
| No <sup>^</sup>                                             | 41.9                              | 1.00                      |              | 1.00                      |              |
| Yes                                                         | 63.4                              | <b>2.40 (1.32– 4.36)</b>  |              | <b>3.55 (1.56– 8.09)</b>  |              |
| <b>Prior unspecific treatment</b>                           |                                   |                           | <b>0.003</b> |                           | <b>0.026</b> |
| No <sup>^</sup>                                             | 37.4                              | 1.00                      |              | 1.00                      |              |
| Yes                                                         | 57.4                              | <b>2.26 (1.32 – 3.89)</b> |              | <b>2.55 (1.18– 5.82)</b>  |              |
| <b>Did you have repeated visits with the same provider?</b> |                                   |                           | <b>0.029</b> |                           | <b>0.012</b> |
| No <sup>^</sup>                                             | 53.6                              | 1.00                      |              | 1.00                      |              |
| Yes                                                         | 34.1                              | <b>0.45 (0.22 – 0.93)</b> |              | <b>0.29 (0.11 – 0.76)</b> |              |

\*p-values <0.05 are indicated in bold

<sup>^</sup> reference category

TOTD: total delay; OR: odd ratio; a: adjusted; CI: confidence interval; TB: tuberculosis

## Supplementary material

**Table S1. Median delays from literature and prevalence of delay in the present study**

| Delay/<br>Prevalence of<br>delay | Pezzotti et<br>al. 2015<br>(Italy) <sup>13</sup> | Saldana et<br>al., 2013<br>(UK) <sup>19</sup> | Tattevin et<br>al., 2012<br>(France) <sup>24</sup> | Farah et al.,<br>2006<br>(Norway) <sup>25</sup> | Jurcev-<br>Savicevic et<br>al. 2013<br>(Croatia) <sup>276</sup> |
|----------------------------------|--------------------------------------------------|-----------------------------------------------|----------------------------------------------------|-------------------------------------------------|-----------------------------------------------------------------|
| Median PD<br>(days)              | 31                                               | 29                                            | 14                                                 | 28                                              |                                                                 |
| Prevalence of<br>PD*             | 64.5                                             | 50.2                                          | 59.7                                               | 50.2                                            |                                                                 |
| Median HSD<br>(days)             | 15                                               | 30                                            | -                                                  | 33                                              | 15                                                              |
| Prevalence of<br>HSD*            | 40.9                                             | 29.3                                          | -                                                  | 25.3                                            | 40.9                                                            |
| Median TODD<br>(days)            | -                                                | 62                                            | -                                                  | 63                                              | -                                                               |
| Prevalence of<br>TODD*           | -                                                | 42.3                                          | -                                                  | 40.9                                            | -                                                               |

\*Prevalence of delay that would have been retrieved in our study, by applying median values from other studies

**Table S2. Correctness of patients' knowledge and symptoms recognition stratified for gender and country of birth**

| Characteristics                                                                                | Italian-born % (N) | Foreign-born % (N) | p*               | Males % (N) | Females % (N) | p*    |
|------------------------------------------------------------------------------------------------|--------------------|--------------------|------------------|-------------|---------------|-------|
| <b>Do you know what TB is? (n=252)</b>                                                         |                    |                    |                  |             |               |       |
| Yes                                                                                            | 81.2 (91)          | 56.4 (79)          | <b>&lt;0.001</b> | 65.8 (106)  | 70.3 (64)     | 0.465 |
| No                                                                                             | 18.8 (21)          | 43.6 (61)          |                  | 34.2 (55)   | 29.7 (27)     |       |
| <b>Do you think TB is a serious disease? (n=250)</b>                                           |                    |                    |                  |             |               |       |
| Yes                                                                                            | 67.9 (76)          | 57.2 (79)          | <b>0.029</b>     | 63.9 (101)  | 58.7 (54)     | 0.309 |
| No                                                                                             | 17.9 (20)          | 14.5 (20)          |                  | 13.3 (21)   | 20.7 (19)     |       |
| Don't know                                                                                     | 14.3 (16)          | 28.3 (39)          |                  | 22.8 (36)   | 20.7 (19)     |       |
| <b>What causes TB? (n=248)</b>                                                                 |                    |                    |                  |             |               |       |
| Infection                                                                                      | 77.5 (86)          | 43.8 (60)          | <b>&lt;0.001</b> | 61.1 (96)   | 54.9 (50)     | 0.491 |
| Punishment                                                                                     | 1.8 (2)            | 0.7 (1)            |                  | 1.3 (2)     | 1.1 (1)       |       |
| Unavoidable                                                                                    | 0.0 (0)            | 1.5 (2)            |                  | 1.3 (2)     | 0.0 (0)       |       |
| Don't know                                                                                     | 20.7 (23)          | 54.0 (74)          |                  | 36.3 (57)   | 44.0 (40)     |       |
| <b>What are the symptoms TB? (n=253)</b>                                                       |                    |                    |                  |             |               |       |
| Cough for more than 3 weeks                                                                    | 58.0 (65)          | 49.6 (70)          | 0.105            | 54.7 (88)   | 51.1 (47)     | 0.890 |
| Sputum with blood                                                                              | 13.4 (15)          | 9.2 (13)           |                  | 11.2 (18)   | 10.9 (10)     |       |
| Fever                                                                                          | 15.2 (17)          | 14.2 (20)          |                  | 13.7 (22)   | 16.3 (15)     |       |
| Weight loss                                                                                    | 2.7 (3)            | 3.5 (5)            |                  | 3.7 (6)     | 2.2 (2)       |       |
| Don't know                                                                                     | 10.7 (12)          | 23.4 (33)          |                  | 16.8 (27)   | 19.7 (18)     |       |
| <b>How a person can get TB? (n=242)</b>                                                        |                    |                    |                  |             |               |       |
| Through germs present in air droplets expelled in the cough                                    | 69.4 (72)          | 37.7 (52)          | <b>&lt;0.001</b> | 55.8 (87)   | 43.0 (37)     | 0.147 |
| Sharing utensils and objects with an infected person                                           | 3.8 (4)            | 7.2 (10)           |                  | 5.8 (9)     | 5.8 (5)       |       |
| Don't know                                                                                     | 26.9 (28)          | 55.1 (76)          |                  | 38.5 (60)   | 51.2 (44)     |       |
| <b>How TB is diagnosed? (n=240)</b>                                                            |                    |                    |                  |             |               |       |
| Through sputum examination                                                                     | 39.0 (39)          | 17.1 (24)          | <b>&lt;0.001</b> | 23.7 (37)   | 31.0 (26)     | 0.409 |
| Through X-ray                                                                                  | 32.0 (32)          | 25.7 (36)          |                  | 28.2 (44)   | 28.6 (24)     |       |
| Don't know                                                                                     | 29.0 (29)          | 57.1 (80)          |                  | 48.1 (75)   | 40.4 (34)     |       |
| <b>Can TB be cured? (n=249)</b>                                                                |                    |                    |                  |             |               |       |
| Yes                                                                                            | 93.6 (103)         | 76.3 (106)         | <b>0.001</b>     | 84.8 (134)  | 82.4 (75)     | 0.858 |
| No                                                                                             | 0.0 (0)            | 2.2 (3)            |                  | 1.3 (2)     | 1.1 (1)       |       |
| Don't know                                                                                     | 6.4 (7)            | 21.6 (30)          |                  | 13.9 (22)   | 16.5 (15)     |       |
| <b>Can TB require a longer treatment to be cured as for multidrug resistant forms? (n=251)</b> |                    |                    |                  |             |               |       |

|                                                 |            |            |              |            |           |              |
|-------------------------------------------------|------------|------------|--------------|------------|-----------|--------------|
| Yes                                             | 51.8 (58)  | 34.5 (48)  | <b>0.016</b> | 41.0 (66)  | 44.4 (40) | 0.868        |
| No                                              | 10.7 (12)  | 18.7 (26)  |              | 15.5 (25)  | 14.4 (13) |              |
| Don't know                                      | 37.5 (42)  | 46.8 (65)  |              | 43.5 (70)  | 41.2 (37) |              |
| <b>Which symptoms made you seek healthcare?</b> |            |            |              |            |           |              |
| Cough for more than 3 weeks (n=253)             |            |            |              |            |           |              |
| Yes                                             | 57.1 (64)  | 72.3 (102) | <b>0.011</b> | 65.2 (105) | 66.3 (61) | 0.861        |
| No                                              | 42.9 (48)  | 27.7 (39)  |              | 34.8 (56)  | 33.7 (31) |              |
| Sputum with blood (n=253)                       |            |            |              |            |           |              |
| Yes                                             | 8.0 (9)    | 17.7 (25)  | <b>0.025</b> | 14.3 (23)  | 12.0 (11) | 0.601        |
| No                                              | 92.0 (103) | 82.3 (116) |              | 85.7 (138) | 88.0 (81) |              |
| Fever (n=253)                                   |            |            |              |            |           |              |
| Yes                                             | 50.9 (57)  | 50.4 (71)  | 0.932        | 50.3 (81)  | 51.1 (47) | 0.905        |
| No                                              | 49.1 (55)  | 49.6 (70)  |              | 49.7 (80)  | 48.9 (45) |              |
| Weight loss (n=253)                             |            |            |              |            |           |              |
| Yes                                             | 28.6 (32)  | 44.7 (63)  | <b>0.009</b> | 44.7 (72)  | 25.0 (23) | <b>0.002</b> |
| No                                              | 71.4 (80)  | 55.3 (78)  |              | 55.3 (89)  | 75.0 (69) |              |
| Tiredness/weakness (n=253)                      |            |            |              |            |           |              |
| Yes                                             | 38.4 (43)  | 52.5 (74)  | <b>0.026</b> | 50.9 (82)  | 38.0 (35) | <b>0.048</b> |
| No                                              | 61.1 (69)  | 47.5 (67)  |              | 49.1 (79)  | 62.0 (57) |              |
| Dizziness (n=253)                               |            |            |              |            |           |              |
| Yes                                             | 4.5 (5)    | 6.4 (9)    | 0.507        | 6.8 (11)   | 3.3 (3)   | 0.232        |
| No                                              | 95.5 (107) | 93.6 (132) |              | 93.2 (150) | 96.7 (89) |              |
| Chest pain (n=253)                              |            |            |              |            |           |              |
| Yes                                             | 17.0 (19)  | 30.5 (43)  | <b>0.013</b> | 28.6 (46)  | 17.4 (16) | <b>0.047</b> |
| No                                              | 83.0 (93)  | 69.5 (98)  |              | 71.4 (115) | 82.6 (76) |              |
| Night sweat (n=253)                             |            |            |              |            |           |              |
| Yes                                             | 20.5 (23)  | 30.5 (43)  | 0.073        | 31.1 (50)  | 17.4 (16) | <b>0.017</b> |
| No                                              | 79.5 (89)  | 69.5 (98)  |              | 68.9 (111) | 82.6 (76) |              |
| <b>Did you think you had TB? (n=252)</b>        |            |            |              |            |           |              |
| Yes                                             | 5.4 (6)    | 11.4 (16)  | 0.090        | 11.8 (19)  | 3.3 (3)   | <b>0.022</b> |
| No                                              | 94.6 (106) | 88.6 (124) |              | 88.2 (142) | 96.7 (88) |              |
| <b>Factors for delay in seeking care</b>        |            |            |              |            |           |              |
| Not aware of symptoms (n=253)                   |            |            |              |            |           |              |
| Yes                                             | 38.4 (43)  | 43.3 (61)  | 0.434        | 57.1 (92)  | 62.0 (57) | 0.454        |

|                                                                     |             |            |              |             |           |       |
|---------------------------------------------------------------------|-------------|------------|--------------|-------------|-----------|-------|
| No                                                                  | 61.6 (69)   | 56.7 (80)  |              | 42.9 (69)   | 38.0 (35) |       |
| Fear of rejection/losing job (n=253)                                |             |            |              |             |           |       |
| Yes                                                                 | 2.7 (3)     | 6.4 (9)    | 0.169        | 5.6 (9)     | 3.3 (3)   | 0.402 |
| No                                                                  | 97.3 (109)  | 93.6 (132) |              | 94.4 (152)  | 96.7 (89) |       |
| Costs (n=253)                                                       |             |            |              |             |           |       |
| Yes                                                                 | 0.0 (0)     | 9.2 (13)   | <b>0.001</b> | 5.6 (9)     | 4.3 (4)   | 0.667 |
| No                                                                  | 100.0 (112) | 90.8 (128) |              | 94.4 (152)  | 95.7 (88) |       |
| Lack of time (n=253)                                                |             |            |              |             |           |       |
| Yes                                                                 | 5.4 (6)     | 7.1 (10)   | 0.573        | 5.6 (9)     | 7.6 (7)   | 0.526 |
| No                                                                  | 94.6 (106)  | 92.9 (131) |              | 94.4 (152)  | 92.4 (85) |       |
| Distance to health centre (n=253)                                   |             |            |              |             |           |       |
| Yes                                                                 | 0.9 (1)     | 2.8 (4)    | 0.270        | 2.5 (4)     | 1.1 (1)   | 0.442 |
| No                                                                  | 99.1 (111)  | 97.2 (137) |              | 97.5 (157)  | 98.9 (91) |       |
| Lack of transportation (n=253)                                      |             |            |              |             |           |       |
| Yes                                                                 | 0.9 (1)     | 0.7 (1)    | 0.870        | 0.0 (0)     | 2.2 (2)   | 0.060 |
| No                                                                  | 99.1 (111)  | 99.3 (140) |              | 100.0 (161) | 97.8 (90) |       |
| Previous non-satisfactory experience with the health system (n=253) |             |            |              |             |           |       |
| Yes                                                                 | 1.8 (2)     | 2.1 (3)    | 0.846        | 1.9 (3)     | 2.2 (2)   | 0.864 |
| No                                                                  | 98.2 (110)  | 97.9 (138) |              | 98.1 (158)  | 97.8 (90) |       |

\*p-values <0.05 are indicated in bold

TB: tuberculosis

Table S3. Attitude towards TB stratified for gender and country of birth

|                                                                                                         | Italian-born<br>% (N) | Foreign-born<br>% (N) | p*               | Males<br>% (N) | Females<br>% (N) | p*               |
|---------------------------------------------------------------------------------------------------------|-----------------------|-----------------------|------------------|----------------|------------------|------------------|
| <b>Should people with TB disclose their illness to other people? (n=252)</b>                            |                       |                       |                  |                |                  |                  |
| Yes                                                                                                     | 70.5 (79)             | 47.1 (66)             | <b>0.001</b>     | 53.1 (85)      | 65.2 (60)        | <b>0.040</b>     |
| No                                                                                                      | 8.9 (10)              | 19.3 (27)             |                  | 18.8 (30)      | 7.6 (7)          |                  |
| Don't know                                                                                              | 20.5 (23)             | 33.6 (47)             |                  | 28.1 (45)      | 27.2 (25)        |                  |
| <b>Who do you think is more likely to get TB, men or women? (n=252)</b>                                 |                       |                       |                  |                |                  |                  |
| Men                                                                                                     | 12.5 (14)             | 15.0 (21)             | 0.305            | 21.2 (34)      | 1.1 (1)          | <b>&lt;0.001</b> |
| Women                                                                                                   | 5.4 (6)               | 10.0 (14)             |                  | 4.4 (7)        | 14.1 (13)        |                  |
| Don't know                                                                                              | 82.1 (92)             | 75.0 (105)            |                  | 74.9 (119)     | 84.8 (78)        |                  |
| <b>How did you feel when you found out that you had TB? (n=253)</b>                                     |                       |                       |                  |                |                  |                  |
| Scared                                                                                                  | 37.5 (42)             | 45.4 (64)             | 0.376            | 36.6 (59)      | 51.1 (47)        | 0.164            |
| Depressed                                                                                               | 20.5 (23)             | 14.2 (20)             |                  | 18.0 (29)      | 15.2 (14)        |                  |
| Didn't believe (denial)                                                                                 | 29.5 (33)             | 31.2 (44)             |                  | 33.5 (54)      | 25.0 (23)        |                  |
| Other                                                                                                   | 12.5 (14)             | 9.2 (13)              |                  | 11.8 (19)      | 8.7 (8)          |                  |
| <b>Did you inform your friends/ family that you had TB? (n=248)</b>                                     |                       |                       |                  |                |                  |                  |
| Yes                                                                                                     | 90.9 (100)            | 55.1 (76)             | <b>&lt;0.001</b> | 61.4 (97)      | 87.8 (79)        | <b>&lt;0.001</b> |
| No                                                                                                      | 9.1 (10)              | 44.9 (62)             |                  | 38.6 (61)      | 12.2 (11)        |                  |
| <b>Have your relationships with your friends/ family changed since finding out you have TB? (n=245)</b> |                       |                       |                  |                |                  |                  |
| Yes                                                                                                     | 22.0 (24)             | 14.7 (20)             | 0.138            | 15.4 (24)      | 22.5 (20)        | 0.165            |
| No                                                                                                      | 78.0 (85)             | 85.3 (116)            |                  | 84.6 (132)     | 77.5 (69)        |                  |
| <b>If yes, how? (n=43)</b>                                                                              |                       |                       |                  |                |                  |                  |
| Improved                                                                                                | 41.7 (10)             | 10.5 (2)              | <b>0.024</b>     | 26.1 (6)       | 30.0 (6)         | 0.775            |
| Worsened                                                                                                | 58.3 (14)             | 89.5 (17)             |                  | 73.9 (17)      | 70.0 (14)        |                  |
| <b>Are people with TB discriminated in the community? (n=249)</b>                                       |                       |                       |                  |                |                  |                  |
| Yes                                                                                                     | 46.4 (51)             | 41.0 (57)             | <b>0.002</b>     | 40.3 (64)      | 48.9 (44)        | 0.386            |
| No                                                                                                      | 33.6 (37)             | 19.4 (27)             |                  | 26.4 (42)      | 24.4 (22)        |                  |
| Don't know                                                                                              | 20.0 (22)             | 39.6 (55)             |                  | 33.3 (53)      | 26.7 (24)        |                  |
| <b>Among TB patients, are male or female patients more discriminated? (n=249)</b>                       |                       |                       |                  |                |                  |                  |
| Male                                                                                                    | 3.7 (4)               | 9.3 (13)              | <b>0.027</b>     | 10.1 (16)      | 1.1 (1)          | <b>&lt;0.001</b> |
| Female                                                                                                  | 2.85 (3)              | 8.6 (12)              |                  | 2.5 (4)        | 12.1 (11)        |                  |
| Don't know                                                                                              | 93.6 (102)            | 82.1 (115)            |                  | 87.3 (138)     | 86.8 (79)        |                  |

\*p-values <0.05 are indicated in bold

TB: tuberculosis

1  
2  
3  
4  
5  
6  
7  
8  
9  
10  
11  
12  
13  
14  
15  
16  
17  
18  
19  
20  
21  
22  
23  
24  
25  
26  
27  
28  
29  
30  
31  
32  
33  
34  
35  
36  
37  
38  
39  
40  
41  
42  
43  
44  
45  
46  
47  
48  
49  
50  
51  
52  
53  
54  
55  
56  
57  
58  
59  
60**Table S4. Risk analysis for DD (Univariate and logistic regression analysis)**

|                                                                                            | <b>DD<br/>&gt;7 days<br/>%</b> | <b>OR<br/>95%CI</b>       | <b>p</b>         | <b>aOR<br/>95%CI</b>      | <b>p</b>         |
|--------------------------------------------------------------------------------------------|--------------------------------|---------------------------|------------------|---------------------------|------------------|
| <b>Foreign-born patients</b>                                                               |                                |                           |                  |                           |                  |
| Yes <sup>^</sup>                                                                           | 36.6                           | <b>1</b>                  | <b>&lt;0.001</b> | <b>1</b>                  | <b>0.024</b>     |
| No                                                                                         | 64.7                           | <b>0.32 (0.18 – 0.54)</b> |                  | <b>0.48 (0.25 – 0.91)</b> |                  |
| <b>Chronic disease</b>                                                                     |                                |                           |                  |                           |                  |
| Yes <sup>^</sup>                                                                           | 59.3                           | <b>1</b>                  | 0.061            | -                         | -                |
| No                                                                                         | 45.1                           | 1.77 (0.97 – 3.24)        |                  |                           |                  |
| <b>Gender</b>                                                                              |                                |                           |                  |                           |                  |
| Female <sup>^</sup>                                                                        | 37.5                           | <b>1</b>                  | <b>0.008</b>     | <b>1</b>                  | <b>&lt;0.001</b> |
| Male                                                                                       | 55.9                           | <b>0.47 (0.27 – 0.83)</b> |                  | <b>0.30 (0.15 – 0.58)</b> |                  |
| <b>First visit: General practitioner</b>                                                   |                                |                           |                  |                           |                  |
| Yes <sup>^</sup>                                                                           | 71.2                           | <b>1</b>                  | <b>&lt;0.001</b> | -                         | -                |
| No                                                                                         | 40.5                           | <b>3.63 (1.95 – 6.77)</b> |                  |                           |                  |
| <b>First visit: Hospital</b>                                                               |                                |                           |                  |                           |                  |
| Yes <sup>^</sup>                                                                           | 36.1                           | <b>1</b>                  | <b>&lt;0.001</b> | <b>1</b>                  | <b>0.002</b>     |
| No                                                                                         | 67.0                           | <b>0.28 (0.16 – 0.49)</b> |                  | <b>0.35 (0.18 – 0.67)</b> |                  |
| <b>After first visit, did you seek treatment from somewhere else?</b>                      |                                |                           |                  |                           |                  |
| Yes <sup>^</sup>                                                                           | 71.0                           | <b>1</b>                  | <b>&lt;0.001</b> | -                         | -                |
| No                                                                                         | 34.4                           | <b>4.67 (2.62 – 8.31)</b> |                  |                           |                  |
| <b>Cough more than 3 weeks</b>                                                             |                                |                           |                  |                           |                  |
| Yes <sup>^</sup>                                                                           | 44.2                           | <b>1</b>                  | <b>0.035</b>     | <b>1</b>                  | <b>0.048</b>     |
| No                                                                                         | 59.0                           | <b>0.55 (0.32 – 0.96)</b> |                  | <b>0.51 (0.27 – 0.99)</b> |                  |
| <b>Dizziness</b>                                                                           |                                |                           |                  |                           |                  |
| Yes <sup>^</sup>                                                                           | 23.1                           | <b>1</b>                  | <b>0.051</b>     | <b>1</b>                  | <b>0.039</b>     |
| No                                                                                         | 50.9                           | <b>0.28 (0.08 – 1.08)</b> |                  | <b>0.21 (0.04 – 0.92)</b> |                  |
| <b>Prior unspecific treatment</b>                                                          |                                |                           |                  |                           |                  |
| Yes <sup>^</sup>                                                                           | 60.4                           | <b>1</b>                  | <b>&lt;0.001</b> | <b>1</b>                  | <b>0.002</b>     |
| No                                                                                         | 33.0                           | <b>3.11 (1.78 – 5.43)</b> |                  | <b>2.85 (1.47 – 5.52)</b> |                  |
| <b>With whom did you have repeated visits? Different providers in a different facility</b> |                                |                           |                  |                           |                  |
| Yes <sup>^</sup>                                                                           | 66.3                           | <b>1</b>                  | <b>&lt;0.001</b> | -                         | -                |
| No                                                                                         | 37.6                           | <b>3.26 (1.82 – 5.86)</b> |                  |                           |                  |

\*p-values &lt;0.05 are indicated in bold

<sup>^</sup> reference category

# BMJ Open

## Determinants of patient and health system delay among Italian and foreign-born pulmonary tuberculosis patients: a multicentre cross-sectional study

|                                 |                                                                                                                                                                                                                                                                                                                                                                                                                                                                                                                                                                                                                                                                                                                                                                                                                                                                                                                                                    |
|---------------------------------|----------------------------------------------------------------------------------------------------------------------------------------------------------------------------------------------------------------------------------------------------------------------------------------------------------------------------------------------------------------------------------------------------------------------------------------------------------------------------------------------------------------------------------------------------------------------------------------------------------------------------------------------------------------------------------------------------------------------------------------------------------------------------------------------------------------------------------------------------------------------------------------------------------------------------------------------------|
| Journal:                        | <i>BMJ Open</i>                                                                                                                                                                                                                                                                                                                                                                                                                                                                                                                                                                                                                                                                                                                                                                                                                                                                                                                                    |
| Manuscript ID                   | bmjopen-2017-019673.R3                                                                                                                                                                                                                                                                                                                                                                                                                                                                                                                                                                                                                                                                                                                                                                                                                                                                                                                             |
| Article Type:                   | Research                                                                                                                                                                                                                                                                                                                                                                                                                                                                                                                                                                                                                                                                                                                                                                                                                                                                                                                                           |
| Date Submitted by the Author:   | 03-May-2018                                                                                                                                                                                                                                                                                                                                                                                                                                                                                                                                                                                                                                                                                                                                                                                                                                                                                                                                        |
| Complete List of Authors:       | Quattrocchi, Annalisa; University of Catania, GF Ingrassia<br>Barchitta, Martina; University of Catania, GF Ingrassia; LaPoSS, Laboratory of Policies and Social Services, University of Catania, Catania, Italy<br>Nobile, Carmelo; University of Catanzaro "Magna Græcia", Department of Health Sciences<br>Prato, Rosa; University of Foggia, Department of Medical and Surgical Sciences<br>Sotgiu, Giovanni; University of Sassari, Department of Biomedical Sciences, Clinical Epidemiology and Medical Statistics Unit<br>Casuccio, Alessandra; University of Palermo, Department of Sciences for Health Promotion and Mother-Child Care "G. D'Alessandro"<br>Vitale, Francesco; University of Palermo, Department of Sciences for Health Promotion "G. D'Alessandro" – Hygiene section<br>Agodi, Antonella; University of Catania, GF Ingrassia; LaPoSS, Laboratory of Policies and Social Services, University of Catania, Catania, Italy |
| <b>Primary Subject Heading</b>: | Public health                                                                                                                                                                                                                                                                                                                                                                                                                                                                                                                                                                                                                                                                                                                                                                                                                                                                                                                                      |
| Secondary Subject Heading:      | Epidemiology, Health policy, Medical education and training, Patient-centred medicine, Public health                                                                                                                                                                                                                                                                                                                                                                                                                                                                                                                                                                                                                                                                                                                                                                                                                                               |
| Keywords:                       | Surveillance, Public health policy, Social epidemiology, Quality in health care < HEALTH SERVICES ADMINISTRATION & MANAGEMENT, Epidemiology < INFECTIOUS DISEASES, Tuberculosis patients                                                                                                                                                                                                                                                                                                                                                                                                                                                                                                                                                                                                                                                                                                                                                           |
|                                 |                                                                                                                                                                                                                                                                                                                                                                                                                                                                                                                                                                                                                                                                                                                                                                                                                                                                                                                                                    |

SCHOLARONE™  
Manuscripts

1  
2  
3 **Determinants of patient and health system delay among Italian and foreign-born pulmonary**  
4 **tuberculosis patients: a multicentre cross-sectional study**  
5  
6  
7  
8  
9

10 **Authors:** Annalisa Quattrocchi<sup>1</sup>, Martina Barchitta<sup>1,2</sup>, Carmelo Nobile<sup>3</sup>, Rosa Prato<sup>4</sup>, Giovanni Sotgiu<sup>5</sup>,  
11  
12 Alessandra Casuccio<sup>6</sup>, Francesco Vitale<sup>6</sup>, Antonella Agodi<sup>1,2\*</sup>, on behalf of the CCM 2013 TB network  
13

14 To the memory of Professor Caterina Mammina, University of Palermo, First Coordinator of the project  
15  
16  
17

18 **Affiliations:**

19 <sup>1</sup>Department of Medical and Surgical Sciences and Advanced Technologies “GF Ingrassia”, University of  
20 Catania, Italy

21 <sup>2</sup>LaPoSS, Laboratory of Policies and Social Services, University of Catania, Catania, Italy

22 <sup>3</sup>Department of Health Sciences, University of Catanzaro 'Magna Græcia', Catanzaro, Italy

23 <sup>4</sup>Department of Medical and Surgical Sciences, University of Foggia, Foggia, Italy

24 <sup>5</sup>University of Sassari, Department of Biomedical Sciences, Clinical Epidemiology and Medical Statistics  
25 Unit, Sassari, Italy

26 <sup>6</sup>Department of Sciences for Health Promotion and Mother-Child Care "G. D'Alessandro", University of  
27 Palermo, Italy  
28

29 **\*Corresponding author:**

30 Professor Antonella Agodi  
31 Department *GF Ingrassia*  
32 University of Catania, Italy  
33 Via S. Sofia, 87  
34 Comparto 10 Edificio C  
35 95123 Catania Italy  
36 Tel/Fax: +39.095.3782183  
37 Mobile: +39.348.3538195  
38 eMail: [agodia@unict.it](mailto:agodia@unict.it)  
39  
40  
41  
42  
43  
44  
45  
46  
47  
48  
49  
50  
51  
52  
53  
54  
55  
56  
57  
58  
59  
60

## ABSTRACT

### Objectives

The aim of this cross-sectional study was to identify key factors associated with patient delay (PD), health system delay (HSD) and total delay (TOTD) in tuberculosis (TB) patients to inform control programs.

### Setting

The study was conducted in four Italian regions in 2014-2016. Data were obtained using a questionnaire including: socio-demographic and lifestyle data, TB comorbidities, patient knowledge and attitudes towards TB, stigma, access to TB care, and health seeking behaviours.

### Participants

Patients' inclusion criteria were being diagnosed as a new smear positive pulmonary TB case and living in one of the above-mentioned Italian regions. Overall, 344 patients from 30 healthcare centres were invited to participate and 253 patients were included in the analysis (26.5% non-response rate); 63.6% were males and 55.7% were non-Italian born.

### Outcome measures

Risk factors for PD, HSD and TOTD in TB patients were assessed by multivariable analysis. Adjusted odds ratios (aOR) and 95% confidence intervals (95%CI) were calculated.

### Results

Median PD, HSD and TOTD were 30, 11 and 45 days, respectively. Factors associated with longer PD were: stigma (aOR:2.30;95%CI:1.06-4.98), chest pain (aOR:2.67;95%CI:1.24-6.49), weight loss (aOR:4.66;95%CI:2.16-10.05), paying for transportation (aOR:2.66;95%CI:1.24-5.74) and distance to the health centre (aOR:2.46;95%CI:1.05-5.74) (the latter three were also associated with TOTD). Shorter HSD was associated with foreign-born and female status (aOR:0.50;95%CI:0.27-0.91; aOR:0.28;95%CI:0.15-0.53, respectively), dizziness (aOR:0.18;95%CI:0.04-0.78) and seeking care at hospital (aOR:0.35;95%CI:0.18-0.66). Prior unspecific treatment was associated with longer HSD (aOR:2.25;95%CI:1.19-4.25) and TOTD (aOR:2.55;95%CI:1.18-5.82). Haemoptysis (aOR:0.12;95%CI:0.03-0.43) and repeated visits with the same provider (aOR:0.29;95%CI:0.11-0.76) showed shorter TOTD.

## Conclusions

This study identifies several determinants of delays associated with patient's behaviours and healthcare qualities. Tackling TB effectively requires addressing key risk factors that make individuals more vulnerable by the means of public health policy, cooperation and advocacy to ensure that all patients have easy access to care and receive high quality healthcare.

## Strengths and limitations of this study

- This is the first multiregional cross-sectional study, in Italy, investigating the association of key factors with patient delay, health system delay and total delay in pulmonary tuberculosis patients.
- Data were collected by healthcare providers and cultural mediators, using a multilingual standardised questionnaire.
- The prospective collection of data and the adjustment for confounding factors with logistic regression analysis are among the strengths of the present study.
- A selection bias should be considered, especially for foreign-born patients who may have experienced difficulties during the interview, resulting in refusal or in missing data.
- Self-reported dates for onset of symptoms and health care seeking may have been affected by recall bias.

## Keywords

Surveillance; public health policy; social epidemiology; TB patients.

## INTRODUCTION

Early diagnosis and prompt treatment of tuberculosis (TB) disease represent key components of any effective national TB control programme.<sup>1 2</sup> If adequately implemented and scaled-up, they can contribute to the reduction of *Mycobacterium tuberculosis* transmission and TB elimination by 2050.<sup>3</sup>

However, delays in diagnosis and treatment of TB frequently occur.<sup>4</sup> Long delays lead to a more advanced disease that may result in poor response to therapies, undesirable clinical *sequelae*, and higher mortality risk.<sup>5</sup> In addition, delay contributes to *M. tuberculosis* transmission within the community.<sup>6 7</sup> It has been shown that an untreated smear-positive patient can infect, on average, 10 healthy contacts annually.<sup>8</sup> Finally, TB diagnosis delay is associated with higher direct and indirect costs.<sup>9</sup>

Delay may occur at patient or at health system level. Factors contributing to patient delay (PD) can be: socio-demographic, physical, financial, health literacy, religious-cultural and stigma.<sup>10</sup> Health system delay (HSD) related factors can be: poor TB knowledge by healthcare providers and poor availability of effective diagnostic tools, number and types of providers encountered before TB diagnosis, patient satisfaction with TB services and waiting time.<sup>10 11</sup> Thus, understanding and identifying the causes of delay in diagnosis and treatment initiation are critical to strengthen TB control programs. Particularly, the importance of social variables as drivers of epidemics and disease risk has been long recognised. Incorporating the perspectives and methods of social epidemiology into studies of infectious disease, many opportunities arise to control the disease.<sup>12</sup>

However, in Europe, and especially in Italy, few studies have focused on social determinants and TB delays. The aim of the present study was to identify the duration and the key factors related to PD, HSD and total delay (TOTD) in pulmonary TB patients, in four Italian Southern regions, with a focus on social determinants.

## **METHODS**

### **Study design**

The present cross-sectional study was conducted in four Italian regions (Calabria, Apulia, Sardinia, and Sicily) from October 2014 to July 2016, and was approved and financed by the Italian Ministry of Health.

Patients' inclusion criteria were being diagnosed as a new smear positive pulmonary TB case (with or without extra-pulmonary TB) and living in one of the above-mentioned Italian regions. Foreign-born patients were enrolled regardless of their legal migrant status (e.g. refugees, asylum seeker, and illegal migrants). Negative smear, relapse, retreatment cases and those with only extra-pulmonary TB were excluded.

The project was performed according to the Declaration of Helsinki, participants were fully informed of the purpose of the study and signed a written informed consent. All data collected were treated confidentially and analysed in aggregated and anonymous form.

### **Patient and Public Involvement**

The present study was conducted without patient and public involvement. Results of the research will be available on request to any study participant to disseminate key study findings providing feedback on the research outcome towards which they have contributed.

### **Sample Size calculation and Sampling Procedure**

A sample size of 261 was estimated by using single population proportion estimation formula with an assumption of 95% confidence interval, 6% margin of error, and 50.4% proportion of PD (> 30 days).<sup>13</sup>

Furthermore, considering 20% of nonresponse rate, the final sample size was 321. All patients meeting the inclusion criteria, attending the healthcare facility during the study period, were prospectively invited to participate in the study.

### **Data collection and definitions**

Data were collected by healthcare workers of each participating centre, during a face-to-face interview at the time when patients were diagnosed and/or initiated treatment. A standardised questionnaire available in Italian, English, and French was used, and if possible, a cultural and linguistic mediator assisted the interview with the task to facilitate communication and understanding, both on linguistic and cultural level.

1  
2  
3 Operators with adequate background of the health topic, within the specific cultures/languages, supported  
4 and assisted patients and healthcare professionals during clinical examinations.  
5

6  
7 The questionnaire contained several domains: i) socio-demographic and lifestyle data; ii) integration index  
8 (II) in Italy (only for foreign-born patients), computed as described in a previous study;<sup>14</sup> iii) TB  
9 comorbidities; iv) patient knowledge of TB-associated symptoms and attitudes towards TB; v) TB related  
10 stigma, measured according to the WHO questionnaire;<sup>15</sup> vi) access to TB diagnosis and treatment and health  
11 seeking behaviours; vii) dates of onset of symptoms, first contact with healthcare service, TB diagnosis  
12 confirmation and treatment initiation; viii) satisfaction with care, assessed by adopting and modifying the  
13 USAID questionnaire.<sup>16</sup>  
14  
15

16  
17 PD was defined as the time interval between the onset of symptoms and patient's first contact with any type  
18 of health care service (including hospital and primary health care).<sup>15 16</sup> HSD was defined as the time interval  
19 between the first consultation with a healthcare provider and the initiation of treatment.<sup>15 16</sup> This can be  
20 subdivided into: diagnostic delay (DD) as the time interval between the presentation to a healthcare provider  
21 and the date of diagnosis and treatment delay (TD) as the time interval between TB diagnosis and initiation  
22 of anti-TB treatment. Thus, TOTD was defined as the time interval from onset of symptoms until treatment  
23 initiation.<sup>16 17</sup>  
24  
25  
26  
27  
28  
29  
30  
31  
32  
33

### 34 **Statistical analysis**

35  
36 Statistical analyses were performed using the SPSS software (IBM SPSS Statistics for Windows, version  
37 22.0).  
38

39  
40 The response rate and descriptive statistics were used to characterise the sample using frequencies, means,  
41 medians and interquartile ranges (IQRs). Valid percentage was reported when data was missing (pairwise  
42 deletion method). Furthermore, the magnitude (proportion) of missing data was quantified and reported in  
43 Supplementary Table S1.  
44  
45  
46

47  
48 Poverty was defined in relation to housing circumstances as living in community centres, first aid centres or  
49 prisons. Education level was dichotomised into two categories (high and low), using a cut-off of 8 school  
50 years.  
51  
52  
53  
54  
55

1  
2  
3 Variables related to stigma and satisfaction with care were recorded on a 5-point Likert scale.<sup>15 16</sup> Scores  
4 were converted as mean percentage score, calculated as follows: (sum of score obtained/maximum score that  
5 could be obtained)  $\times$  100.  
6  
7

8 For TB cases born abroad, the II was calculated based on the score sum of 11 selected variables from the  
9 study questionnaire and then standardised to range from 0 to 10.<sup>14</sup>  
10  
11

12 Longer delays (outcome) were defined according to previous Italian studies. Particularly, long PD was  
13 defined as >30 days, while long HSD and TOTD were defined as > the median value observed in the study  
14 population, for HSD and TOTD, respectively.<sup>13 18</sup>  
15  
16

17 Prevalence estimates of longer delay, using cut-off values reported from other studies, were reported in  
18 Supplementary Table S2.  
19  
20

21 Median values were also used as cut-off points to dichotomise quantitative variables (e.g. age and stigma).  
22 The two-tailed Chi-squared test was used for the statistical comparison of categorical variables, whereas  
23 quantitative variables were compared using Student's *t* test, as the sample was big enough. The Levene's test  
24 was performed to verify the homogeneity of variance across groups.  
25  
26  
27  
28  
29

30 The characteristics of patients with longer delays (all forms) were compared to those of patients without  
31 (comparators) and the crude odds ratios (ORs) and the corresponding 95% confidence intervals (95% CIs)  
32 were computed.  
33  
34  
35

36 All variables with  $P < 0.1$  on univariate analysis were included in the multivariable logistic regression  
37 analysis, using a backward-stepwise selection procedure. The analysis was only run on cases which have a  
38 complete set of data. The breakpoint for variable removal was set at  $P = 0.10$ . The adjusted ORs (aOR) with  
39 the respective 95% CIs were reported. A  $P$ -value  $< 0.05$  was considered statistically significant.  
40  
41  
42  
43  
44  
45  
46  
47  
48  
49  
50  
51  
52  
53  
54  
55  
56  
57  
58  
59  
60

## RESULTS

A total of 344 patients from 30 healthcare centres were invited to participate. Overall, 91 (26.5%) refused the interview, and 253 patients were included in the analysis. Patients who refused the interview were older than patients who agreed (mean age: 46.0 and 40.7 years, respectively;  $P = 0.023$ ). However, no statistical differences resulted for Country of birth and gender. Completion rate for all questions included in the analysis was  $\geq 80\%$ . Missing data ranged from 0.4% to 21.7% (Table S1).

Overall, 55.3% of patients were temporary or permanently living in Sicily, 22.1% in Calabria, 17.4% in Apulia, and 5.2% in Sardinia.

Table 1 shows the main characteristics of the study population and comparisons for Country of birth and gender. Mean age was 40.7 years (median: 38; IQR 27-53) and 63.6% were males. One hundred forty-one (55.7%) patients were born abroad and they were younger than Italians (mean age: 34.3 years and 48.7 years, respectively;  $P < 0.001$ ).

Stratifying by Country of origin, 47.9% of patients came from European Countries, and mostly from Romania (82.1%), 28.6% from the African Countries, 11.4% from Eastern Mediterranean Countries, 9.3% from South-East Asia, 2.1% from Western Pacific Countries, and 0.7% from American Countries. Foreign-born patients reported higher degree of poverty and literacy: they lived in nursing homes or did not have permanent residency (47.8%), 64.7% were unemployed or occasional workers, and 79.4% were illiterate or had less than 8 years of educational activities ( $P < 0.05$ ).

About one-third suffered of chronic diseases (i.e. HIV/AIDS, diabetes, chronic obstructive pulmonary disease, disability, renal failure and cardiovascular disease), particularly those born in Italy (39.1%). Current smokers and alcohol users were 27.2% and 6.9%, respectively. Higher percentages of smokers and alcohol users were found among male patients (32.5% and 10.1%). However, no significant differences were observed between Italian and foreign-born patients (Table 1).

### Patient knowledge and symptoms recognition

Foreign-born patients reported lack of knowledge on the disease more often compared with Italian-born (Supplementary Table S3). Foreign-born patients were less aware that TB is an infectious disease and is transmitted by airborne bacteria. They did not know the symptoms most frequently associated with the

disease, how TB is diagnosed and cured, and that multi-drug resistant TB may require a longer treatment time to achieve a cure ( $P < 0.05$ ).

Only 3.6% of TB patients reported no symptoms, while 49% of patients reported three or more symptoms. Overall, 65.6% had cough for more than 3 weeks. Sputum with blood was reported by only 13.4% of patients. The main reason for not seeking care was that they perceived the TB symptoms to be mild (58.9%). Foreign-born patients reported more frequently the following symptoms: cough, sputum with blood, weakness, weight loss, and chest pain, compared with Italian-born patients. Furthermore, women reported tiredness/weakness, weight loss, chest pain, and night sweating less frequently compared with men. Being irregular migrants was the only reason for delayed seeking care in women, while in men other motivations were reported (Table S3).

### **Attitude towards TB and stigma**

A higher percentage of men (38.6%) and foreign-born patients (44.9%) did not inform their families and friends on the disease, compared with women (12.2%) and Italian-born (9.1%) ( $P < 0.001$ ). Detailed results are reported in Supplementary Table S4.

A moderate level of stigma was found (mean: 59.5%; median and IQR: 58.7%, 22.7%-94.7%) in all patients. Overall, 53.9% of foreign-born patients reported TB related stigma above the median value, compared with 41.4% of Italian born ( $P = 0.049$ ) (Table 1).

### **Healthcare-seeking behaviour and access to TB care centres**

General Practitioners (GP) were consulted, as first choice, by 30% of patients, mostly Italians (46.8%). On the contrary, foreign-born cases were shown to seek more frequently the hospital care (70.3%). Around 41% of the cases were visited by more than one healthcare provider, and this was mainly reported by the Italian group (53.2% vs. 31.7%;  $P = 0.001$ ). Overall, 59% of the cases received unspecific treatment (mainly antibiotics) before TB diagnosis; this occurred more frequently among cases born in Italy (75.7% vs. 51.6%;  $P = 0.005$ ).

### **Risk analysis of delay**

Median PD, HSD and TOTD were 30, 11, and 45 days, respectively (Table 1). On univariate analysis, factors associated with long PD ( $> 30$  days) were TB-related stigma, paying for transportation, distance to

1  
2  
3 get to the healthcare centre, presence of unintentional weight loss, fatigue, chest pain and suffering of  
4 chronic diseases. In the final model of the multivariable analysis, stigma (aOR: 2.30, 95%CI: 1.06 – 4.98),  
5 paying for transportation (aOR: 2.66, 95%CI: 1.24 – 5.74), distance to the healthcare centre (aOR: 2.30,  
6 95%CI: 1.06 – 4.98), weight loss (aOR: 4.66, 95%CI: 2.16 – 10.05) and chest pain (aOR: 2.67, 95%CI: 1.24  
7 – 6.49) remained associated with PD (Table 2).

8  
9  
10  
11  
12 Prior unspecific treatment, patients referring to a GP at the first visit, and those visited by multiple providers  
13 in different facilities were more likely to report long HSD (> 11 days), while female gender, non-Italian  
14 origin, seeking care at hospital level, presence of cough for more than 3 weeks and dizziness were associated  
15 with shorter HSD. On multivariable analysis, being foreign-born (aOR: 0.50, 95%CI: 0.27 – 0.91) and  
16 female (aOR: 0.28, 95%CI: 0.15 – 0.53), seeking care at hospital (aOR: 0.35, 95%CI: 0.18 – 0.66) and  
17 presence of dizziness (aOR: 0.18, 95%CI: 0.04 – 0.78) remained associated with shorter HSD. While, prior  
18 unspecific treatment was associated with longer HSD (aOR: 2.25, 95%CI: 1.19 – 4.25) (Table 3).

19  
20  
21  
22  
23  
24  
25  
26 Factors associated with long DD (>7 days), were identical to those associated with HSD, and in addition,  
27 having cough for more than 3 weeks was significantly associated with shorter DD (Table S5). No variables  
28 were associated with long TD (>2 days).

29  
30  
31  
32  
33 Finally, good knowledge of TB, paying for transportation, distance to reach the health centre, prior  
34 unspecific treatment, and weight loss were associated with long TOTD (> 45 days), while patients reporting  
35 cough and hemoptysis and who had repeated visits with the same provider showed shorter TOTD. In the  
36 logistic regression analysis, paying for transportation (aOR: 2.10, 95%CI: 1.01 – 4.35), distance to reach the  
37 centre (aOR: 3.09, 95%CI: 1.38 – 6.90), prior unspecific treatment (aOR: 2.55, 95%CI: 1.18 – 5.82), and  
38 weight loss (aOR: 3.55, 95%CI: 1.56 – 8.09), repeated visits with the same provider (aOR: 0.29, 95%CI:  
39 0.11– 0.76) and haemoptysis (aOR: 0.12, 95%CI: 0.03– 0.43), were independently associated with TOTD  
40 (Table 4).

## DISCUSSION

Reducing the time interval between symptoms recognition and TB treatment can decrease mycobacterial transmission, morbidity, and mortality. Although there is no general consensus on what may constitute an acceptable interval between onset of symptoms and initiation of TB treatment,<sup>19</sup> it has been suggested that overall TB delay could be used as a key indicator of programme performance.<sup>4</sup>

The TB notification rate in the general Italian population has been stable in the last years.<sup>20</sup> However, most of the cases occur in vulnerable groups, who do not recognise the symptoms or have poor access to healthcare services. The two most affected groups are the elderly and foreign-born people. The latter group accounts for about 50% of all TB cases in Italy (data until 2008).<sup>21</sup>

In our study, 55.7% patients were foreign-born, and they were younger than Italians. Younger age among foreign-born patients has also been reported in other studies.<sup>13 22</sup> Although, the TB notification rate is decreasing in Europe, the reduction in individuals of foreign origin is still slower than in native residents. This represents one of the main challenges for TB elimination, especially in those European countries where individuals of foreign-born origin represent a large proportion of TB cases.<sup>23</sup>

In our study, the median values for PD (30 days) and HSD (11 days, of which 7 days for DD and 2 days for TD, respectively) are similar to those reported by other studies conducted in Italy and in other European countries with a low-TB incidence. Particularly, a recent Italian study reported median PD and HSD values of 31 and 15 days, respectively.<sup>13</sup> European studies reported median PDs of 14 days (France),<sup>24</sup> 28 days (Norway),<sup>25</sup> and 29 days (UK).<sup>19</sup> Considering HSD (and its two components), studies reported median values of 15 days (Croatia),<sup>26</sup> 25 days (for DD in France),<sup>24</sup> 30 days (UK),<sup>19</sup> and 33 days (Norway).<sup>25</sup> However, in our study, median TOTD (45 days) was lower than values reported elsewhere, which ranged between 62 days (UK),<sup>19</sup> and 63 days (Norway).<sup>25</sup>

Table S2 shows median values reported by other studies,<sup>13 19 24-26</sup> and the prevalence of delay that would have been detected in our study, by using them.

It is worth noting that some studies evaluated both forms of TB (pulmonary and extra-pulmonary), and tools for data collection and definitions of delays were widely heterogeneous among studies, thus comparisons should be made with caution.

1  
2  
3 Nevertheless, median values detected in our study are encouraging. Indeed, for PD a median value of 30  
4 days has been considered an acceptable value by many authors,<sup>18 27</sup> although others have suggested values  
5 less than 3 weeks.<sup>28</sup>  
6

7  
8 Regarding HSD, our median value is below the accepted value, which is considered to be 15 days.<sup>27</sup> Low  
9 values of HSD and TOTD might probably due to a higher level of awareness of TB among involved  
10 healthcare professionals in Italy, in recent years. Similarly to our results, other studies have found that PD  
11 was longer than HSD,<sup>13 29</sup> while others have found the opposite,<sup>24 25</sup> or no differences.<sup>19</sup> It is likely that  
12 patients who contact the health system later could have more severe symptoms facilitating TB suspicion and  
13 prompt diagnosis,<sup>13</sup> thus the higher the PD, the lower the HSD, and *vice versa*.<sup>4 25</sup>  
14  
15

16  
17 In our study, longer PD was associated with high degree of stigma, paying for transportation, distance to  
18 healthcare facility, presence of unintentional weight loss and chest pain. Aside from stigma and chest pain all  
19 others were also detected as risk factors for TOTD. Our results are consistent with findings of the WHO  
20 Eastern Mediterranean Region study, where stigma, economic factors, and time to reach the health facility  
21 were among the main determinants for delayed access to healthcare system.<sup>15</sup>  
22  
23

24  
25 TB-related stigma represents a cultural aspect which drives individuals to hide their condition from others,  
26 and refusing seeking care,<sup>30</sup> but evidence shows that stigma barriers may be avoided through interventions  
27 addressed improving TB-related health literacy.<sup>10</sup>  
28  
29

30  
31 The reason why chest pain and weight loss were associated with long PD is not clear, because these  
32 symptoms, together with persistent cough, are considered key TB signs. Other studies retrieved similar  
33 results. Chest pain was found positively associated with longer PD (> 90 days) in a Brazilian study,<sup>31</sup> and  
34 with TOTD (>60 days) in Ethiopia.<sup>27</sup> Similarly, weight loss was associated with longer PD, both in Brazil  
35 (>30 days)<sup>31</sup> and in Italy (>15 days),<sup>13</sup> with PD (>27 days) and TOTD (>50 days) in Uzbekistan,<sup>32</sup> and with  
36 HSD (>18 days) in another Brazilian study.<sup>33</sup> These results could be explained by the assumption that  
37 patients consider these as transient symptoms from a general illness, hence, maybe, initiating self-treatment  
38 lasting until deterioration and manifestation of other specific symptoms. Furthermore, timely referral to  
39 healthcare facilities for disabling symptoms may be challenging due to financial constraints, poor health  
40  
41  
42  
43  
44  
45  
46  
47  
48  
49  
50  
51  
52  
53  
54  
55  
56  
57  
58  
59  
60

1  
2  
3 literacy, and stigma. In addition, a long delay until diagnosis favours disease progression and therefore  
4 symptom appearance. Also, non-specific symptoms could lead to longer suspicion delays by the clinician.

5  
6 Especially for foreign-born patients, language barriers, poor knowledge of symptoms, fear of immigration  
7 authorities and long wait for appointment have been associated with delay in seeking care,<sup>34 35</sup> raising  
8 concerns about the equity of access to care among TB patient. Thus, understanding immigrants' views of TB  
9 and the obstacles that they face when accessing the health system, taking into consideration the social,  
10 economic and legislative context of the new Country where they live, has an important role and should be  
11 considered in TB control programmes.  
12

13  
14 The association of HSD with birth place might be due to the low TB rate in Italy, thus TB would be less  
15 suspected and investigated in the Italian-born population, or by contrast, being a migrant may point  
16 physicians to a prompt TB diagnosis.<sup>13</sup> This finding is consistent with other studies.<sup>13 19</sup>

17  
18 Female gender was associated with shorter HSD, in contrast with other studies.<sup>4</sup> In general, female patients  
19 are reported to encounter greater barriers (financial, physical, and health literacy) for appropriate medical  
20 care and treatment. Further investigations on possible confounders should be considered.  
21

22  
23 In line with others,<sup>4 30 36 37</sup> a first healthcare contact in hospital, was strongly associated with shorter HSD,  
24 while referring to GP was a risk factor for longer HSD. A combination of several factors, may explain this  
25 result: lack of TB suspicion among primary care providers in low-endemic countries; seeking assistance in  
26 hospital for patients at higher risk of TB (e.g. migrants from endemic countries) and/or with more severe TB  
27 disease who are thus investigated faster; availability and easier access to diagnostic tests and specialists  
28 within the hospital.<sup>24</sup>  
29

30  
31 Furthermore, repeated visits, especially with different healthcare workers in different health facilities, has  
32 been retrieved as predictor of HSD in other studies,<sup>15 17 38-40</sup> however we did not find this association in the  
33 final model. It has been reported that generally, patients see different healthcare providers in case of poor  
34 clinical suspicions of signs and symptoms, failure to request for proper investigations, refer patients to  
35 specialised TB centre for further investigations,<sup>41</sup> or when they receive inappropriate treatment that can  
36 modify the clinical picture of the disease.<sup>40</sup>  
37  
38  
39  
40  
41  
42  
43  
44  
45  
46  
47  
48  
49  
50  
51  
52  
53  
54  
55  
56  
57  
58  
59  
60

1  
2  
3 The association of HSD and TOTD with previous unspecific treatment is in agreement with other results.<sup>13 24</sup>

4 This is of a particular concern in the current global epidemiological scenario where antimicrobial resistance  
5 is rapidly developing and spreading and a more prudent use of antimicrobials is urgently needed, by for  
6 instance, limiting the use of empirical antibiotics in patients with respiratory symptoms.<sup>24</sup> Training GP for  
7 the early identification of signs and symptoms and prompt referral of suspected cases to TB diagnosis and  
8 treatment health centres is essential.  
9

10  
11 Finally, other factors associated with shorter TOTD were presenting sputum with blood and having visits by  
12 the same provider. Sputum with blood is usually recognised as a late sign of TB, thus patients with severe  
13 symptoms are immediately suspected for TB. Intuitively, having visits with the same provider might reduce  
14 repetition of examinations and misdiagnosis.  
15

16  
17 Our study has some limitations, some of them specific to the cross-sectional study design. A selection bias  
18 should be considered. In fact, the mediator was not often available in hospitals, thus, foreign-born patients  
19 recently arrived in Italy, may have experienced difficulties during the interview, resulting in refusal or in  
20 missing data. In any case, no difference has been detected for country of birth among responders and non-  
21 responders and the completion rate for the questions included in the analyses was at least 80%.  
22

23  
24 Missing data are a challenge which could affect the quality of the evidence, limit power, and reduce  
25 generalizability, causing a distortion from the truth.<sup>42 43</sup> There is no general consensus from the literature  
26 regarding an acceptable percentage of missing data in a data set for valid statistical inferences, yet. Cut-off  
27 values have been proposed ranging from 5% to 20%.<sup>44 45</sup> In our study we retrieved a certain amount of  
28 missing data, up to 21%, and observations with missing data have been excluded in the multivariable  
29 analysis, hence reducing the final sample size. In addition, the pattern of missingness was not explored. Thus  
30 missing data may represent potential bias in our findings. The questionnaire used for data collection could  
31 have been a plausible cause for missing data in our study, because of the length of the survey, and the  
32 unavailability of translation in languages other than English and French. Thus, to prevent missing data in  
33 further studies, the data collection tool should be designed and adapted to the needs of the target population,  
34 piloted and monitored during the study.  
35  
36  
37  
38  
39  
40  
41  
42  
43  
44  
45  
46  
47  
48  
49  
50  
51  
52  
53  
54  
55  
56  
57  
58  
59  
60

1  
2  
3 Also, the low education level of the overall population may have contributed to an information bias.  
4  
5 However, since a higher frequency of low educational level was shown in foreign-born patients than in  
6  
7 patients born in Italy, a differential misclassification could be supposed and thus the direction of the bias is  
8  
9 unpredictable. Furthermore, as the onset date of symptoms was self-reported, it may have been affected by  
10  
11 recall bias that could have occurred heterogeneously in the whole sample. Another limitation is that data on  
12  
13 HIV status and other risk factors (e.g. alcohol and drug use and detention status) were not available for the  
14  
15 vast majority of patients.

16  
17 In the present study, several aspects have been investigating as key factors contributing to PD and HSD in  
18  
19 TB patients. However, further studies addressing other components of delays<sup>6 30 46</sup> may be necessary to  
20  
21 understand all factors that are closely associated with delay in the diagnosis and treatment of TB.  
22  
23 Furthermore, in our regression model we did not take into account for the potential collinearity of  
24  
25 explanatory variables, which could explain complex relationship involving several risk factors at the same  
26  
27 time, for example the use of unspecific antibiotics and multiple visits with healthcare providers

28  
29 A possible approach to combine the relevant variables into summary scores or indexes and assesses the  
30  
31 relationship of these with the outcome of interest should be explored.

32  
33 This is the first multiregional cross-sectional study, conducted in Italy, which investigated the association of  
34  
35 several factors with PD, HSD and TOTD delay in pulmonary TB patients. It provides new evidence which  
36  
37 can be addressed through tailored actions, in order to reduce the burden of TB in Italy. Furthermore, the  
38  
39 prospective collection of data in four Italian regions, using a multilingual standardised questionnaire and the  
40  
41 adjustment for confounding factors with logistic regression analysis are among the strengths of the present  
42  
43 study.

44  
45 In conclusion, this study detected several modifiable factors associated with longer delay in TB patients, both  
46  
47 attributable to patients and health system service. Interventions designed to empower the general population  
48  
49 and stakeholders, by increasing knowledge and awareness and screening of active TB in migrants upon  
50  
51 arrival are key actions to reduce PD and HSD and achieve TB control.<sup>47</sup> Strategies should mainly target  
52  
53 alleviating stigma around TB, improving TB-related health literacy and access to care among the general  
54  
55 population, education of GP, earlier referral of TB suspects to the hospital, where appropriate investigations

1  
2  
3 for final diagnosis are readily available, and limiting the use of unspecific treatment in patients with  
4  
5 respiratory symptoms.  
6  
7  
8  
9  
10  
11  
12  
13  
14  
15  
16  
17  
18  
19  
20  
21  
22  
23  
24  
25  
26  
27  
28  
29  
30  
31  
32  
33  
34  
35  
36  
37  
38  
39  
40  
41  
42  
43  
44  
45  
46  
47  
48  
49  
50  
51  
52  
53  
54  
55  
56  
57  
58  
59  
60

For peer review only

## ACKNOWLEDGEMENTS

The Authors are grateful to all dedicated staff of the participating hospitals: Silvana Adinolfi, Alessandra Bergamasco, Giulia Bertoli, Gaetano Brindicci, Daniela Castronuovo, Pierpaolo Ciavarella, Vanessa Cozza, Consuelo Geraci, Anna Giannelli, Nicola Grandi, Giuliana Guadagnino, Maria Elena Locatelli, Viviana Marras, Carmen Martino, Alice Medaglia, Maria Cristina Monni, Alessio Pampaloni, Simona Piacenti, Piero Pirina, Rachele Russo, Teresa Scarabaggio, Fabio Sultani, Iulia Adelina Turiac.

## COLLABORATORS

CCM 2013 TB network: Alessandro Bisbano, Celestino Bonura, Bruno Cacopardo, Maria Giovanna Cappelli, Antonio Cascio, Francesco Cesario, Paola Di Carlo, Anna Di Taranto, Francesca Fortunato, Antonina Franco, Anna Grimaldi, Carmelo Iacobello, Maria Clara La Rosa, Valentina Mascaro, Andrea Maugeri, Arturo Montineri, Salvatore Nisticò, Cecilia Occhino, Grazia Pantò, Maria Polimeni, Vincenzo Portelli, Graziano Provenzano, Pasquale Quartararo, Francesco Quintieri, Salvatore Requirez, Francesca Savalli, Consiglia Venitucci, Maria Teresa Zorzetto, Rossella Zucco.

All CCM 2013 TB network collaborators supervised and coordinated at the hospital level patients' enrolment and data collection.

## COMPETING INTERESTS

The Authors declare that they have no competing interests.

## ETHICS

All procedures followed were in accordance with the Helsinki Declaration of 1975, as revised in 2008.

Informed consent was obtained from all patients for being included in the study.

## DATA SHARING STATEMENT

No additional data available

## FUNDING SOURCE

The project entitled "*Valutazione dei determinanti di ritardo nell'accesso ai servizi sanitari, nella diagnosi e nel trattamento della tubercolosi polmonare (PTB) in popolazioni vulnerabili. Valutazione dell'impatto sull'epidemiologia locale e sulla prevalenza di resistenza/multiresistenza ai farmaci antitubercolari* -

"Assessment of determinants of delay in healthcare access for the diagnosis and treatment of PTB in

1  
2  
3 vulnerable populations. Assessment of the impact on the local epidemiology and on the prevalence of  
4 antituberculosis drug resistance/multiresistance” was approved and financially supported by the Italian  
5 Ministry of Health (Centro nazionale per la prevenzione e il Controllo delle Malattie, CCM 2013). The  
6 funding source had no role in any phase of the development of the current study.  
7  
8  
9

### 10 **CONTRIBUTORSHIP**

11  
12 A Agodi, C Nobile, R Prato and G Sotgiu conceived, designed and supervised the study and coordinated  
13 regional data collection. A Casuccio and F Vitale coordinated the project. M Barchitta and A Quattrocchi  
14 designed the questionnaire and managed data collection at the central level. A Quattrocchi performed the  
15 statistical analysis and wrote the first draft of the manuscript. A Agodi, M Barchitta and A Quattrocchi  
16 interpreted the results and wrote the advanced version of the manuscript.  
17  
18  
19  
20  
21

22 All Authors critically reviewed the manuscript and approved the final version.  
23  
24  
25  
26  
27  
28  
29  
30  
31  
32  
33  
34  
35  
36  
37  
38  
39  
40  
41  
42  
43  
44  
45  
46  
47  
48  
49  
50  
51  
52  
53  
54  
55  
56  
57  
58  
59  
60

**REFERENCES**

1. Migliori GB, Zellweger JP, Abubakar I, et al. European union standards for tuberculosis care. *Eur Respir J* 2012;39(4):807-19. doi: 10.1183/09031936.00203811
2. Tuberculosis Coalition for Technical Assistance. International Standards for Tuberculosis Care (ISTC), second edition. The Hague, 2009
3. World Health Organization. The End TB Strategy. Global strategy and targets for tuberculosis prevention, care and control after 2015. WHO; Geneva, 2014. <http://www.who.int/tb/strategy/en/> (accessed 11 Mar 2017)
4. Cai J, Wang X, Ma A, et al. Factors associated with patient and provider delays for tuberculosis diagnosis and treatment in Asia: a systematic review and meta-analysis. *PLoS One* 2015;10(3):e0120088. doi: 10.1371/journal.pone.0120088
5. Gebreegziabher SB, Bjune GA, Yimer SA. Total Delay Is Associated with Unfavorable Treatment Outcome among Pulmonary Tuberculosis Patients in West Gojjam Zone, Northwest Ethiopia: A Prospective Cohort Study. *PLoS One* 2016;11(7):e0159579. doi: 10.1371/journal.pone.0159579
6. Storla DG, Yimer S, Bjune GA. A systematic review of delay in the diagnosis and treatment of tuberculosis. *BMC Public Health* 2008;8:15. doi: 10.1186/1471-2458-8-15
7. Bjune G. Tuberculosis in the 21st century: an emerging pandemic? *Nor Epidemiol* 2005;15(2):133–139
8. Bassili A, Seita A, Baghdadi S, et al. Diagnostic and treatment delay in tuberculosis in 7 countries of the Eastern Mediterranean region. *Infect Dis Clin Pract* 2008;16:23.
9. Vassal A. The Costs and Cost-effectiveness of Tuberculosis Control. *Health Policy and Planning* 2009 Jan; 24(1): 55-62 Amsterdam University press. 2009
10. Yang WT, Gounder CR, Akande T, et al. Barriers and delays in tuberculosis diagnosis and treatment services: does gender matter? *Tuberc Res Treat* 2014;2014:461935. doi: 10.1155/2014/461935
11. USAID and TBCARE II. Study Report. Reducing TB Delays: Evaluating the Frequency and Causes of Delays in Bangladesh and Swaziland. 2014. <http://tbcare2.org/content/reducing-tb-delays-evaluating-frequency-and-causes-delays-bangladesh-and-swaziland> (accessed 29 Nov 2016).

- 1  
2  
3 12. Noppert GA, Kubale JT, Wilson ML. Analyses of infectious disease patterns and drivers largely lack  
4 insights from social epidemiology: contemporary patterns and future opportunities. *J Epidemiol*  
5 *Community Health* 2017;71(4):350-55. doi: 10.1136/jech-2016-207967  
6  
7  
8  
9 13. Pezzotti P, Pozzato S, Ferroni E, et al. Delay in diagnosis of pulmonary tuberculosis: A survey in the  
10 Lazio region, Italy. *Epidemiol Biostat Public Health* 2015;12:1-10.  
11  
12  
13 14. Barniol J, Niemann S, Louis VR, et al. Transmission dynamics of pulmonary tuberculosis between  
14 autochthonous and immigrant sub-populations. *BMC Infect Dis* 2009;9:197. doi: 10.1186/1471-2334-9-  
15 197  
16  
17  
18 15. World Health Organization. Diagnostic and treatment delay in tuberculosis. WHO; Geneva, 2006.  
19 <http://applications.emro.who.int/dsaf/dsa710.pdf> (accessed 26 Apr 2014).  
20  
21  
22 16. USAID. Reducing Delays in TB Diagnosis: Data Collection Tools to evaluate the cause and frequency of  
23 TB delays. 2011.  
24 [http://www.challengetb.org/publications/tools/ua/Data\\_Collection\\_Tool\\_TB\\_Patient\\_Delay.pdf](http://www.challengetb.org/publications/tools/ua/Data_Collection_Tool_TB_Patient_Delay.pdf) (accessed  
25 26 Apr 2014)  
26  
27  
28 17. Sreeramareddy CT, Qin ZZ, Satyanarayana S, et al. Delays in diagnosis and treatment of pulmonary  
29 tuberculosis in India: a systematic review. *Int J Tuberc Lung Dis* 2014;18(3):255-66. doi:  
30 10.5588/ijtld.13.0585  
31  
32  
33 18. Gagliotti C, Resi D, Moro ML. Delay in the treatment of pulmonary TB in a changing demographic  
34 scenario. *Int J Tuberc Lung Dis* 2006;10(3):305-9.  
35  
36  
37 19. Saldana L, Abid M, McCarthy N, et al. Factors affecting delay in initiation of treatment of tuberculosis in  
38 the Thames Valley, UK. *Public Health* 2013;127(2):171-7. doi: 10.1016/j.puhe.2012.11.010  
39  
40  
41 20. World Health Organization. Global tuberculosis report 2016. WHO; Geneva 2016.  
42 [http://www.who.int/tb/publications/global\\_report/en/](http://www.who.int/tb/publications/global_report/en/) (accessed 28 Jan 2017).  
43  
44  
45 21. Ingrosso L, Vescio F, Giuliani M, et al. Risk factors for tuberculosis in foreign-born people (FBP) in  
46 Italy: a systematic review and meta-analysis. *PLoS One* 2014;9(4):e94728. doi:  
47 10.1371/journal.pone.0094728  
48  
49  
50  
51  
52  
53  
54  
55  
56  
57  
58  
59  
60

- 1  
2  
3 22. Mor Z, Kolb H, Lidji M, et al. Tuberculosis diagnostic delay and therapy outcomes of non-national  
4 migrants in Tel Aviv, 1998-2008. *Euro Surveill* 2013;18(12)  
5  
6  
7 23. Hollo V, Beaute J, Kodmon C, et al. Tuberculosis notification rate decreases faster in residents of native  
8 origin than in residents of foreign origin in the EU/EEA, 2010 to 2015. *Euro Surveill* 2017;22(12) doi:  
9 10.2807/1560-7917.ES.2017.22.12.30486  
10  
11  
12 24. Tattevin P, Che D, Fraisse P, et al. Factors associated with patient and health care system delay in the  
13 diagnosis of tuberculosis in France. *Int J Tuberc Lung Dis* 2012;16(4):510-5. doi: 10.5588/ijtld.11.0420  
14  
15  
16 25. Farah MG, Rygh JH, Steen TW, et al. Patient and health care system delays in the start of tuberculosis  
17 treatment in Norway. *BMC Infect Dis* 2006;6:33. doi: 10.1186/1471-2334-6-33  
18  
19  
20 26. Jurcev-Savicevic A, Mulic R, Kozul K, et al. Health system delay in pulmonary tuberculosis treatment in  
21 a country with an intermediate burden of tuberculosis: a cross-sectional study. *BMC Public Health*  
22 2013;13:250. doi: 10.1186/1471-2458-13-250  
23  
24  
25 27. Gebreegziabher SB, Bjune GA, Yimer SA. Patients' and health system's delays in the diagnosis and  
26 treatment of new pulmonary tuberculosis patients in West Gojjam Zone, Northwest Ethiopia: a cross-  
27 sectional study. *BMC Infect Dis* 2016;16(1):673. doi: 10.1186/s12879-016-1995-z  
28  
29  
30 28. Lambert ML, Van der Stuyft P. Delays to tuberculosis treatment: shall we continue to blame the victim?  
31 *Trop Med Int Health* 2005;10(10):945-6. doi: 10.1111/j.1365-3156.2005.01485.x  
32  
33  
34 29. Leutscher P, Madsen G, Erlandsen M, et al. Demographic and clinical characteristics in relation to  
35 patient and health system delays in a tuberculosis low-incidence country. *Scand J Infect Dis*  
36 2012;44(1):29-36. doi: 10.3109/00365548.2011.608081  
37  
38  
39 30. Li Y, Ehiri J, Tang S, et al. Factors associated with patient, and diagnostic delays in Chinese TB patients:  
40 a systematic review and meta-analysis. *BMC Med* 2013;11:156. doi: 10.1186/1741-7015-11-156  
41  
42  
43 31. Maciel EL, Golub JE, Peres RL, et al. Delay in diagnosis of pulmonary tuberculosis at a primary health  
44 clinic in Vitoria, Brazil. *Int J Tuberc Lung Dis* 2010;14(11):1403-10.  
45  
46  
47 32. Belkina TV, Khojiev DS, Tillyashaykhov MN, et al. Delay in the diagnosis and treatment of pulmonary  
48 tuberculosis in Uzbekistan: a cross-sectional study. *BMC Infect Dis* 2014;14:624. doi: 10.1186/s12879-  
49 014-0624-y  
50  
51  
52  
53  
54  
55  
56  
57  
58  
59  
60

- 1  
2  
3 33. Deponti GN, Silva DR, Coelho AC, et al. Delayed diagnosis and associated factors among new  
4 pulmonary tuberculosis patients diagnosed at the emergency department of a tertiary care hospital in  
5 Porto Alegre, South Brazil: a prospective patient recruitment study. *BMC Infect Dis* 2013;13:538. doi:  
6 10.1186/1471-2334-13-538  
7  
8  
9  
10 34. Asch S, Leake B, Anderson R, et al. Why do symptomatic patients delay obtaining care for tuberculosis?  
11 *Am J Respir Crit Care Med* 1998;157(4 Pt 1):1244-8. doi: 10.1164/ajrccm.157.4.9709071  
12  
13 35. Abarca Tomas B, Pell C, Bueno Cavanillas A, et al. Tuberculosis in migrant populations. A systematic  
14 review of the qualitative literature. *PLoS One* 2013;8(12):e82440. doi: 10.1371/journal.pone.0082440  
15  
16 36. Sreeramareddy CT, Panduru KV, Menten J, et al. Time delays in diagnosis of pulmonary tuberculosis: a  
17 systematic review of literature. *BMC Infect Dis* 2009;9:91. doi: 10.1186/1471-2334-9-91  
18  
19 37. Diez M, Bleda MJ, Alcaide J, et al. Determinants of health system delay among confirmed tuberculosis  
20 cases in Spain. *Eur J Public Health* 2005;15(4):343-9. doi: 10.1093/eurpub/cki010  
21  
22 38. Osei E, Akweongo P, Binka F. Factors associated with DELAY in diagnosis among tuberculosis patients  
23 in Hohoe Municipality, Ghana. *BMC Public Health* 2015;15:721. doi: 10.1186/s12889-015-1922-z  
24  
25 39. Takarinda KC, Harries AD, Nyathi B, et al. Tuberculosis treatment delays and associated factors within  
26 the Zimbabwe national tuberculosis programme. *BMC Public Health* 2015;15:29. doi: 10.1186/s12889-  
27 015-1437-7  
28  
29 40. Sabawoon W, Sato H, Kobayashi Y. Delay in the treatment of pulmonary tuberculosis: a report from  
30 Afghanistan. *Environ Health Prev Med* 2012;17(1):53-61. doi: 10.1007/s12199-011-0219-9  
31  
32 41. Kiwuwa MS, Charles K, Harriet MK. Patient and health service delay in pulmonary tuberculosis patients  
33 attending a referral hospital: a cross-sectional study. *BMC Public Health* 2005;5:122. doi: 10.1186/1471-  
34 2458-5-122  
35  
36 42. Hardy SE, Allore H, Studenski SA. Missing data: a special challenge in aging research. *J Am Geriatr Soc*  
37 2009;57(4):722-9. doi: 10.1111/j.1532-5415.2008.02168.x  
38  
39 43. Schlomer GL, Bauman S, Card NA. Best practices for missing data management in counseling  
40 psychology. *J Couns Psychol* 2010;57(1):1-10. doi: 10.1037/a0018082  
41  
42  
43  
44  
45  
46  
47  
48  
49  
50  
51  
52  
53  
54  
55  
56  
57  
58  
59  
60

- 1  
2  
3 44. Peng CY, Harwell MR, Liou SM, et al. Advances in missing data methods and implications for  
4 educational research. In Sawilowsky SS, editor, *Real Data Analysis*. New York. 2006. p. 31-78  
5  
6 45. Schafer JL. Multiple imputation: a primer. *Stat Methods Med Res* 1999;8(1):3-15. doi:  
7  
8 10.1177/096228029900800102  
9  
10 46. Getnet F, Demissie M, Assefa N, et al. Delay in diagnosis of pulmonary tuberculosis in low-and middle-  
11 income settings: systematic review and meta-analysis. *BMC Pulm Med* 2017;17(1):202. doi:  
12  
13 10.1186/s12890-017-0551-y  
14  
15 47. Pareek M, Greenaway C, Noori T, et al. The impact of migration on tuberculosis epidemiology and  
16 control in high-income countries: a review. *BMC Med* 2016;14:48. doi: 10.1186/s12916-016-0595-5  
17  
18  
19  
20  
21  
22  
23  
24  
25  
26  
27  
28  
29  
30  
31  
32  
33  
34  
35  
36  
37  
38  
39  
40  
41  
42  
43  
44  
45  
46  
47  
48  
49  
50  
51  
52  
53  
54  
55  
56  
57  
58  
59  
60

## Tables

Table 1. Patients' characteristics

|                                                 |                                | All<br>% (N) | Italian-born<br>% (N) | Foreign-born<br>% (N) | p*               | Males<br>% (N) | Females<br>% (N) | p*           |
|-------------------------------------------------|--------------------------------|--------------|-----------------------|-----------------------|------------------|----------------|------------------|--------------|
| <b>Age (mean)</b>                               |                                | 40.7 (246)   | 48.7 (109)            | 34.3(137)             | <b>&lt;0.001</b> | 41.0 (157)     | 40.1 (89)        | 0.941        |
| <b>Country of birth<br/>(n=253)</b>             | Italy                          | 44.3 (112)   | -                     | -                     | -                | 42.2 (68)      | 47.8 (44)        | 0.389        |
|                                                 | Abroad                         | 55.7 (141)   | -                     | -                     |                  | 57.8 (93)      | 52.2 (48)        |              |
| <b>Gender<br/>(n=253)</b>                       | Males                          | 63.6 (161)   | 60.7 (68)             | 66.0 (93)             | 0.389-           | -              | -                | -            |
|                                                 | Females                        | 36.4 (92)    | 39.3 (44)             | 34.0 (48)             |                  | -              | -                |              |
| <b>Education level<br/>(n=251)</b>              | Low                            | 72.5 (182)   | 63.6 (70)             | 79.4 (112)            | <b>0.005</b>     | 70.8 (114)     | 75.6 (68)        | 0.419        |
|                                                 | High                           | 27.5 (69)    | 36.4 (40)             | 20.6 (29)             |                  | 29.2 (47)      | 24.4 (22)        |              |
| <b>Residence<br/>(n=240)</b>                    | Homeless/prison/ Nursing homes | 20.8 (50)    | 3.7 (4)               | 34.8 (46)             | <b>&lt;0.001</b> | 26.6 (41)      | 10.5 (9)         | <b>0.003</b> |
|                                                 | Apartment (own or rented)      | 79.2 (190)   | 96.3 (104)            | 65.2 (86)             |                  | 73.4 (113)     | 89.5 (77)        |              |
| <b>Employment<br/>(n=241)</b>                   | Unemployed or occasional work  | 42.7 (103)   | 14.3 (15)             | 64.7 (88)             | <b>&lt;0.001</b> | 47.1 (73)      | 34.9 (30)        | <b>0.019</b> |
|                                                 | Permanent job                  | 26.6 (64)    | 33.3 (35)             | 21.3 (29)             |                  | 28.4 (44)      | 23.3 (20)        |              |
|                                                 | Housewife/retired/student      | 30.7 (74)    | 52.4 (55)             | 14.0 (19)             |                  | 24.5 (38)      | 41.9 (36)        |              |
| <b>Smoking habits<br/>(n=236)</b>               | Current                        | 27.2 (67)    | 29.9 (32)             | 25.2 (35)             | 0.409            | 32.5 (51)      | 18.0 (16)        | <b>0.014</b> |
|                                                 | Never/former                   | 72.8 (179)   | 70.1 (75)             | 74.8 (104)            |                  | 67.5 (106)     | 82.0 (73)        |              |
| <b>Alcohol abuse<sup>^</sup><br/>(n=248)</b>    | Yes                            | 6.9 (17)     | 6.3 (7)               | 7.3 (10)              | 0.758            | 10.1 (16)      | 1.1 (1)          | <b>0.007</b> |
|                                                 | No                             | 93.1 (231)   | 93.7 (104)            | 92.7 (127)            |                  | 89.9 (142)     | 98.9 (89)        |              |
| <b>Chronic diseases<sup>†</sup><br/>(n=251)</b> | Yes                            | 28.3 (71)    | 39.1 (43)             | 19.9 (28)             | <b>0.001</b>     | 31.2 (50)      | 23.1 (21)        | 0.167        |
|                                                 | No                             | 71.7 (180)   | 60.9 (67)             | 80.1 (113)            |                  | 68.8 (110)     | 76.9 (70)        |              |
| <b>Stigma<br/>(n=252)</b>                       | >median                        | 48.4 (122)   | 41.4 (46)             | 53.9 (76)             | <b>0.049</b>     | 51.6 (83)      | 42.9 (39)        | 0.185        |
|                                                 | ≤median                        | 51.6 (130)   | 58.6 (65)             | 46.1 (65)             |                  | 48.4 (78)      | 57.1 (52)        |              |
| <b>Integration index (mean)<sup>°</sup></b>     |                                | 4.4 (141)    | -                     | -                     | -                | 4.1 (93)       | 5.1 (48)         | <b>0.008</b> |
| <b>Years in Italy (mean)<sup>°</sup></b>        |                                | 7.1 (127)    | -                     | -                     | -                | 6.6 (85)       | 8.2 (42)         | 0.242        |
| <b>Patient Delay<br/>(n=231)</b>                | Median (IQR)                   | 30 (8-60)    | 15 (7-60)             | 30 (14-60)            | -                | 30 (10-60)     | 28 (7-60)        | -            |
|                                                 | (>30 days)                     | 64.5 (149)   | 29.1 (30)             | 40.6 (52)             | 0.069            | 37.2 (55)      | 32.5 (27)        | 0.480        |
| <b>Health system delay<br/>(n=225)</b>          | Median (IQR)                   | 11 (5-33)    | 21 (7.25-61)          | 8 (4-22)              | -                | 14.5 (6-37)    | 8 (4-31)         | -            |
|                                                 | (>11 days)                     | 48.1 (111)   | 61.5 (64)             | 37.0 (47)             | <b>&lt;0.001</b> | 55.4 (82)      | 34.9 (29)        | <b>0.008</b> |
| <b>Diagnostic delay<br/>(n=225)</b>             | Median (IQR)                   | 7 (3-30)     | 15 (4.75-60)          | 7 (3-15)              | -                | 14 (4-30)      | 6 (3-28)         | -            |
|                                                 | (>7 days)                      | 49.3 (111)   | 64.7 (66)             | 36.6 (45)             | <b>&lt;0.001</b> | 55.9 (81)      | 37.5 (30)        | <b>0.008</b> |

1  
2  
3  
4  
5  
6  
7  
8  
9  
10  
11  
12  
13  
14  
15  
16  
17  
18  
19  
20  
21  
22  
23  
24  
25  
26  
27  
28  
29  
30  
31  
32  
33  
34  
35  
36  
37  
38  
39  
40  
41  
42  
43  
44  
45  
46  
47

|                                |              |             |             |            |       |            |             |       |
|--------------------------------|--------------|-------------|-------------|------------|-------|------------|-------------|-------|
| <b>Treatment delay (n=219)</b> | Median (IQR) | 2 (1-4)     | 2 (1-4)     | 2 (1-4)    | -     | 2 (1-5)    | 2 (1-4)     | -     |
|                                | (>2 days)    | 38.4 (84)   | 38.4 (38)   | 38.3 (46)  | 0.994 | 40.9 (56)  | 34.1 (28)   | 0.322 |
| <b>Total delay (n=208)</b>     | Median (IQR) | 45 (25-121) | 53 (25-123) | 40 (25-97) | -     | 47 (26-99) | 41 (16-120) | -     |
|                                | (>45 days)   | 49.5 (97)   | 56.0 (50)   | 44.0 (47)  | 0.091 | 66.0 (64)  | 34.0 (33)   | 0.525 |

\*p-values <0.05 are indicated in bold

^ ≥4 times a week

° only in foreign-born patients

† HIV/AIDS, diabetes, chronic obstructive pulmonary disease, disability, renal failure, cardiovascular disease

For peer review only

**Table 2. Risk analysis for patient delay (Univariate and logistic regression analysis)**

|                                                          | PD<br>>30 days<br>% | OR<br>95%CI               | p*               | aOR<br>95%CI               | p*               |
|----------------------------------------------------------|---------------------|---------------------------|------------------|----------------------------|------------------|
| <b>Foreign-born patients</b>                             |                     |                           |                  |                            |                  |
| No <sup>^</sup>                                          | 29.1                | 1.00                      | 0.069            | -                          | -                |
| Yes                                                      | 40.6                | 1.67 (0.96 - 2.89)        |                  |                            |                  |
| <b>Knowledge of what TB is</b>                           |                     |                           | 0.091            | -                          | -                |
| No <sup>^</sup>                                          | 27.8                | 1.00                      |                  |                            |                  |
| Yes                                                      | 39.1                | 1.66 (0.92 - 3.00)        |                  |                            |                  |
| <b>Knowledge of how TB is diagnosed</b>                  |                     |                           | 0.051            | -                          | -                |
| No <sup>^</sup>                                          | 28.7                | 1.00                      |                  |                            |                  |
| Yes                                                      | 41.3                | 1.75 (0.99 - 3.07)        |                  |                            |                  |
| <b>Stigma</b>                                            |                     |                           | <b>0.001</b>     |                            | <b>0.034</b>     |
| < median <sup>^</sup>                                    | 24.8                | <b>1.00</b>               |                  | <b>1.00</b>                |                  |
| > median                                                 | 46.5                | <b>2.64 (1.51 - 4.61)</b> |                  | <b>2.30 (1.06 - 4.98)</b>  |                  |
| <b>Pay for transportation to reach the health centre</b> |                     |                           | <b>&lt;0.001</b> |                            | <b>0.012</b>     |
| No <sup>^</sup>                                          | 23.5                | <b>1.00</b>               |                  | <b>1.00</b>                |                  |
| Yes                                                      | 49.4                | <b>3.18 (1.77 - 5.73)</b> |                  | <b>2.66 (1.24 - 5.74)</b>  |                  |
| <b>Did you think you had TB?</b>                         |                     |                           | 0.090            | -                          | -                |
| No <sup>^</sup>                                          | 33.8                | 1.00                      |                  |                            |                  |
| Yes                                                      | 52.4                | 2.15 (0.87 - 5.31)        |                  |                            |                  |
| <b>Close distance of the first visit place</b>           |                     |                           | <b>0.018</b>     |                            | <b>0.037</b>     |
| Yes <sup>^</sup>                                         |                     |                           |                  | <b>1.00</b>                |                  |
| No                                                       | 21.9                | 1.00                      |                  | <b>2.46 (1.05 - 5.74)</b>  |                  |
|                                                          | 39.2                | 2.30 (1.15 - 4.62)        |                  |                            |                  |
| <b>Weight loss</b>                                       |                     |                           | <b>&lt;0.001</b> |                            | <b>&lt;0.001</b> |
| No <sup>^</sup>                                          | 22.5                | <b>1.00</b>               |                  | <b>1.00</b>                |                  |
| Yes                                                      | 56.2                | <b>4.41 (2.48 - 7.83)</b> |                  | <b>4.66 (2.16 - 10.05)</b> |                  |
| <b>Tiredness/weakness</b>                                |                     |                           | <b>0.001</b>     | -                          | -                |
| No <sup>^</sup>                                          | 25.8                | <b>1.00</b>               |                  |                            |                  |
| Yes                                                      | 45.9                | <b>2.44 (1.40 - 4.25)</b> |                  |                            |                  |
| <b>Chest pain</b>                                        |                     |                           | <b>0.026</b>     |                            | <b>0.031</b>     |
| No <sup>^</sup>                                          | 31.4                | <b>1.00</b>               |                  | <b>1.00</b>                |                  |
| Yes                                                      | 47.5                | <b>1.97 (1.08 - 3.61)</b> |                  | <b>2.67 (1.24 - 6.49)</b>  |                  |
| <b>Chronic diseases</b>                                  |                     |                           | <b>0.009</b>     | -                          | -                |
| No <sup>^</sup>                                          | 29.6                | <b>1.00</b>               |                  |                            |                  |
| Yes                                                      | 47.8                | <b>2.17 (1.21 - 3.90)</b> |                  |                            |                  |

\*p-values <0.05 are indicated in bold

<sup>^</sup> reference category

PD: patient delay; OR: odd ratio; a: adjusted; CI: confidence interval; TB: tuberculosis

**Table 3. Risk analysis for health system delay (Univariate and logistic regression analysis)**

|                                                                         | <b>HSD<br/>&gt;11 days<br/>%</b> | <b>OR<br/>95%CI</b>       | <b>p*</b>        | <b>aOR<br/>95%CI</b>      | <b>p*</b>        |
|-------------------------------------------------------------------------|----------------------------------|---------------------------|------------------|---------------------------|------------------|
| <b>Foreign-born patients</b>                                            |                                  |                           |                  |                           |                  |
| No <sup>^</sup>                                                         | 61.5                             | <b>1.00</b>               | <b>&lt;0.001</b> | <b>1.00</b>               | <b>0.024</b>     |
| Yes                                                                     | 37.0                             | <b>0.37 (0.22 - 0.63)</b> |                  | <b>0.50 (0.27 - 0.91)</b> |                  |
| <b>Age</b>                                                              |                                  |                           | 0.1              | -                         | -                |
| > median                                                                | 43.7                             | 1.00                      |                  |                           |                  |
| ≤median                                                                 | 54.6                             | 1.55 (0.92 - 2.62)        |                  |                           |                  |
| <b>Gender</b>                                                           |                                  |                           | <b>0.003</b>     | <b>1.00</b>               | <b>&lt;0.001</b> |
| Male <sup>^</sup>                                                       | 55.4                             | <b>1.00</b>               |                  | <b>1.00</b>               |                  |
| Female                                                                  | 34.9                             | <b>0.43 (0.25 - 0.75)</b> |                  | <b>0.28 (0.15 - 0.53)</b> |                  |
| <b>First visit with GP</b>                                              |                                  |                           | <b>&lt;0.001</b> | -                         |                  |
| No <sup>^</sup>                                                         | 39.9                             | <b>1.00</b>               |                  |                           |                  |
| Yes                                                                     | 68.7                             | <b>3.30 (1.80 - 6.06)</b> |                  |                           |                  |
| <b>First visit at hospital</b>                                          |                                  |                           | <b>&lt;0.001</b> | <b>1.00</b>               | <b>0.001</b>     |
| No <sup>^</sup>                                                         | 64.6                             | <b>1.00</b>               |                  | <b>1.00</b>               |                  |
| Yes                                                                     | 35.7                             | <b>0.30 (0.17 - 0.53)</b> |                  | <b>0.35 (0.18 - 0.66)</b> |                  |
| <b>Seeking treatment somewhere else, after first visit</b>              |                                  |                           | <b>&lt;0.001</b> | -                         | -                |
| No <sup>^</sup>                                                         | 35.1                             | <b>1.00</b>               |                  |                           |                  |
| Yes                                                                     | 66.7                             | <b>3.70 (2.12 - 6.44)</b> |                  |                           |                  |
| <b>Cough &gt; 3 weeks</b>                                               |                                  |                           | <b>0.036</b>     | -                         | -                |
| No <sup>^</sup>                                                         | 57.7                             | <b>1.00</b>               |                  |                           |                  |
| Yes                                                                     | 43.1                             | <b>0.56 (0.32 - 0.97)</b> |                  |                           |                  |
| <b>Dizziness</b>                                                        |                                  |                           | <b>0.040</b>     | <b>1.00</b>               | <b>0.023</b>     |
| No <sup>^</sup>                                                         | 49.8                             | <b>1.00</b>               |                  | <b>1.00</b>               |                  |
| Yes                                                                     | 21.4                             | <b>0.28 (0.15 - 0.53)</b> |                  | <b>0.18 (0.04 - 0.78)</b> |                  |
| <b>Prior unspecific treatment</b>                                       |                                  |                           | <b>&lt;0.001</b> | <b>1.00</b>               | <b>0.012</b>     |
| No <sup>^</sup>                                                         | 34.1                             | <b>1.00</b>               |                  | <b>1.00</b>               |                  |
| Yes                                                                     | 57.1                             | <b>2.58 (1.49 - 4.46)</b> |                  | <b>2.25 (1.19 - 4.25)</b> |                  |
| <b>Repeated visits with different providers in a different facility</b> |                                  |                           | <b>&lt;0.001</b> | -                         | -                |
| No <sup>^</sup>                                                         | 37.3                             | <b>1.00</b>               |                  |                           |                  |
| Yes                                                                     | 62.8                             | <b>2.84 (1.61 - 5.01)</b> |                  |                           |                  |

\*p-values <0.05 are indicated in bold

<sup>^</sup> reference category

HSD: health system delay; OR: odd ratio; a: adjusted; CI: confidence interval; GP: general practitioner;

**Table 4. Risk analysis for total delay (Univariate and logistic regression analysis)**

|                                                | <b>TOTD<br/>&gt;45 days<br/>%</b> | <b>OR<br/>95%CI</b>       | <b>p*</b>    | <b>aOR<br/>95%CI</b>      | <b>p*</b>    |
|------------------------------------------------|-----------------------------------|---------------------------|--------------|---------------------------|--------------|
| <b>Foreign-born patients</b>                   |                                   |                           | 0.091        | -                         | -            |
| No <sup>^</sup>                                | 56.0                              | 1.00                      |              |                           |              |
| Yes                                            | 44.0                              | 0.62 (0.35 – 1.08)        |              |                           |              |
| <b>Do you know what TB is?</b>                 |                                   |                           | <b>0.012</b> | -                         | -            |
| No <sup>^</sup>                                | 37.1                              | 1.00                      |              |                           |              |
| Yes                                            | 55.8                              | <b>2.14 (1.18 – 3.88)</b> |              |                           |              |
| <b>Pay for transportation</b>                  |                                   |                           | <b>0.004</b> |                           | <b>0.047</b> |
| No <sup>^</sup>                                | 40.5                              | 1.00                      |              | 1.00                      |              |
| Yes                                            | 62.3                              | <b>2.43 (1.32 – 4.46)</b> |              | <b>2.10 (1.01 – 4.35)</b> |              |
| <b>Close distance of the first visit place</b> |                                   |                           | <b>0.003</b> |                           | <b>0.006</b> |
| Yes <sup>^</sup>                               | 32.8                              | 1.00                      |              | 1.00                      |              |
| No                                             | 56.9                              | <b>2.71 (1.38 – 5.31)</b> |              | <b>3.09 (1.38 – 6.90)</b> |              |
| <b>Cough &gt; 3 weeks</b>                      |                                   |                           | <b>0.038</b> | -                         | -            |
| No <sup>^</sup>                                | 60.3                              | 1.00                      |              |                           |              |
| Yes                                            | 44.5                              | <b>0.53 (0.29– 0.97)</b>  |              |                           |              |
| <b>Sputum with blood</b>                       |                                   |                           | <b>0.005</b> |                           | <b>0.001</b> |
| No <sup>^</sup>                                | 53.5                              | 1.00                      |              | 1.00                      |              |
| Yes                                            | 25.0                              | <b>0.29 (0.12– 0.72)</b>  |              | <b>0.12 (0.03– 0.43)</b>  |              |
| <b>Weight loss</b>                             |                                   |                           | <b>0.004</b> |                           | <b>0.003</b> |
| No <sup>^</sup>                                | 41.9                              | 1.00                      |              | 1.00                      |              |
| Yes                                            | 63.4                              | <b>2.40 (1.32– 4.36)</b>  |              | <b>3.55 (1.56– 8.09)</b>  |              |
| <b>Prior unspecific treatment</b>              |                                   |                           | <b>0.003</b> |                           | <b>0.026</b> |
| No <sup>^</sup>                                | 37.4                              | 1.00                      |              | 1.00                      |              |
| Yes                                            | 57.4                              | <b>2.26 (1.32 – 3.89)</b> |              | <b>2.55 (1.18– 5.82)</b>  |              |
| <b>Repeated visits with the same provider</b>  |                                   |                           | <b>0.029</b> |                           | <b>0.012</b> |
| No <sup>^</sup>                                |                                   |                           |              | 1.00                      |              |
| Yes                                            | 53.6                              | 1.00                      |              | 1.00                      |              |
|                                                | 34.1                              | <b>0.45 (0.22 – 0.93)</b> |              | <b>0.29 (0.11 – 0.76)</b> |              |

\*p-values <0.05 are indicated in bold

<sup>^</sup> reference category

TOTD: total delay; OR: odd ratio; a: adjusted; CI: confidence interval; TB: tuberculosis

1  
2  
3  
4  
5  
6  
7  
8  
9  
10  
11  
12  
13  
14  
15  
16  
17  
18  
19  
20  
21  
22  
23  
24  
25  
26  
27  
28  
29  
30  
31  
32  
33  
34  
35  
36  
37  
38  
39  
40  
41  
42  
43  
44  
45  
46  
47  
48  
49  
50  
51  
52  
53  
54  
55  
56  
57  
58  
59  
60**Supplementary material****Table S1. Proportion of missing data, for the variables included in the multivariable analyses**

| Variable                                                                       | N  | %    |
|--------------------------------------------------------------------------------|----|------|
| Stigma                                                                         | 1  | 0.4  |
| Prior unspecific treatment                                                     | 1  | 0.4  |
| Did you think you had TB?                                                      | 1  | 0.4  |
| Do you know what TB is?                                                        | 1  | 0.4  |
| Chronic diseases                                                               | 2  | 0.8  |
| After first visit, did you seek treatment from somewhere else?                 | 5  | 2.0  |
| First visit with GP                                                            | 6  | 2.4  |
| First visit at hospital                                                        | 6  | 2.4  |
| Age                                                                            | 7  | 2.8  |
| Do you know how TB is diagnosed?                                               | 13 | 5.1  |
| Pay for transportation to reach the health centre                              | 21 | 8.3  |
| Patient Delay                                                                  | 22 | 8.7  |
| Health system delay                                                            | 22 | 8.7  |
| Diagnostic delay                                                               | 28 | 11.1 |
| Treatment delay                                                                | 34 | 13.4 |
| Did you have repeated visits with different providers in a different facility? | 35 | 13.8 |
| Did you have repeated visits with the same provider?                           | 35 | 13.8 |
| Total delay                                                                    | 45 | 17.8 |
| Close distance of the first visit place                                        | 55 | 21.7 |

**Table S2. Median delays from literature and prevalence of delay in the present study**

| Delay/<br>Prevalence of<br>delay | Pezzotti et<br>al. 2015<br>(Italy) <sup>13</sup> | Saldana et<br>al., 2013<br>(UK) <sup>19</sup> | Tattevin et<br>al., 2012<br>(France) <sup>24</sup> | Farah et al.,<br>2006<br>(Norway) <sup>25</sup> | Jurcev-<br>Savicevic et<br>al. 2013<br>(Croatia) <sup>276</sup> |
|----------------------------------|--------------------------------------------------|-----------------------------------------------|----------------------------------------------------|-------------------------------------------------|-----------------------------------------------------------------|
| Median PD<br>(days)              | 31                                               | 29                                            | 14                                                 | 28                                              |                                                                 |
| Prevalence of<br>PD*             | 64.5                                             | 50.2                                          | 59.7                                               | 50.2                                            |                                                                 |
| Median HSD<br>(days)             | 15                                               | 30                                            | -                                                  | 33                                              | 15                                                              |
| Prevalence of<br>HSD*            | 40.9                                             | 29.3                                          | -                                                  | 25.3                                            | 40.9                                                            |
| Median TOTD<br>(days)            | -                                                | 62                                            | -                                                  | 63                                              | -                                                               |
| Prevalence of<br>TOTD*           | -                                                | 42.3                                          | -                                                  | 40.9                                            | -                                                               |

\*Prevalence of delay that would have been retrieved in our study, by applying median values from other studies

**Table S3. Correctness of patients' knowledge and symptoms recognition stratified for gender and country of birth**

| Characteristics                                                                                | Italian-born % (N) | Foreign-born % (N) | p*               | Males % (N) | Females % (N) | p*    |
|------------------------------------------------------------------------------------------------|--------------------|--------------------|------------------|-------------|---------------|-------|
| <b>Do you know what TB is? (n=252)</b>                                                         |                    |                    |                  |             |               |       |
| Yes                                                                                            | 81.2 (91)          | 56.4 (79)          | <b>&lt;0.001</b> | 65.8 (106)  | 70.3 (64)     | 0.465 |
| No                                                                                             | 18.8 (21)          | 43.6 (61)          |                  | 34.2 (55)   | 29.7 (27)     |       |
| <b>Do you think TB is a serious disease? (n=250)</b>                                           |                    |                    |                  |             |               |       |
| Yes                                                                                            | 67.9 (76)          | 57.2 (79)          | <b>0.029</b>     | 63.9 (101)  | 58.7 (54)     | 0.309 |
| No                                                                                             | 17.9 (20)          | 14.5 (20)          |                  | 13.3 (21)   | 20.7 (19)     |       |
| Don't know                                                                                     | 14.3 (16)          | 28.3 (39)          |                  | 22.8 (36)   | 20.7 (19)     |       |
| <b>What causes TB? (n=248)</b>                                                                 |                    |                    |                  |             |               |       |
| Infection                                                                                      | 77.5 (86)          | 43.8 (60)          | <b>&lt;0.001</b> | 61.1 (96)   | 54.9 (50)     | 0.491 |
| Punishment                                                                                     | 1.8 (2)            | 0.7 (1)            |                  | 1.3 (2)     | 1.1 (1)       |       |
| Unavoidable                                                                                    | 0.0 (0)            | 1.5 (2)            |                  | 1.3 (2)     | 0.0 (0)       |       |
| Don't know                                                                                     | 20.7 (23)          | 54.0 (74)          |                  | 36.3 (57)   | 44.0 (40)     |       |
| <b>What are the symptoms TB? (n=253)</b>                                                       |                    |                    |                  |             |               |       |
| Cough for more than 3 weeks                                                                    | 58.0 (65)          | 49.6 (70)          | <b>0.105</b>     | 54.7 (88)   | 51.1 (47)     | 0.890 |
| Sputum with blood                                                                              | 13.4 (15)          | 9.2 (13)           |                  | 11.2 (18)   | 10.9 (10)     |       |
| Fever                                                                                          | 15.2 (17)          | 14.2 (20)          |                  | 13.7 (22)   | 16.3 (15)     |       |
| Weight loss                                                                                    | 2.7 (3)            | 3.5 (5)            |                  | 3.7 (6)     | 2.2 (2)       |       |
| Don't know                                                                                     | 10.7 (12)          | 23.4 (33)          |                  | 16.8 (27)   | 19.7 (18)     |       |
| <b>How a person can get TB? (n=242)</b>                                                        |                    |                    |                  |             |               |       |
| Through germs present in air droplets expelled in the cough                                    | 69.4 (72)          | 37.7 (52)          | <b>&lt;0.001</b> | 55.8 (87)   | 43.0 (37)     | 0.147 |
| Sharing utensils and objects with an infected person                                           | 3.8 (4)            | 7.2 (10)           |                  | 5.8 (9)     | 5.8 (5)       |       |
| Don't know                                                                                     | 26.9 (28)          | 55.1 (76)          |                  | 38.5 (60)   | 51.2 (44)     |       |
| <b>How TB is diagnosed? (n=240)</b>                                                            |                    |                    |                  |             |               |       |
| Through sputum examination                                                                     | 39.0 (39)          | 17.1 (24)          | <b>&lt;0.001</b> | 23.7 (37)   | 31.0 (26)     | 0.409 |
| Through X-ray                                                                                  | 32.0 (32)          | 25.7 (36)          |                  | 28.2 (44)   | 28.6 (24)     |       |
| Don't know                                                                                     | 29.0 (29)          | 57.1 (80)          |                  | 48.1 (75)   | 40.4 (34)     |       |
| <b>Can TB be cured? (n=249)</b>                                                                |                    |                    |                  |             |               |       |
| Yes                                                                                            | 93.6 (103)         | 76.3 (106)         | <b>0.001</b>     | 84.8 (134)  | 82.4 (75)     | 0.858 |
| No                                                                                             | 0.0 (0)            | 2.2 (3)            |                  | 1.3 (2)     | 1.1 (1)       |       |
| Don't know                                                                                     | 6.4 (7)            | 21.6 (30)          |                  | 13.9 (22)   | 16.5 (15)     |       |
| <b>Can TB require a longer treatment to be cured as for multidrug resistant forms? (n=251)</b> |                    |                    |                  |             |               |       |

|                                                 |            |            |              |            |           |              |
|-------------------------------------------------|------------|------------|--------------|------------|-----------|--------------|
| Yes                                             | 51.8 (58)  | 34.5 (48)  | <b>0.016</b> | 41.0 (66)  | 44.4 (40) | 0.868        |
| No                                              | 10.7 (12)  | 18.7 (26)  |              | 15.5 (25)  | 14.4 (13) |              |
| Don't know                                      | 37.5 (42)  | 46.8 (65)  |              | 43.5 (70)  | 41.2 (37) |              |
| <b>Which symptoms made you seek healthcare?</b> |            |            |              |            |           |              |
| Cough for more than 3 weeks (n=253)             |            |            |              |            |           |              |
| Yes                                             | 57.1 (64)  | 72.3 (102) | <b>0.011</b> | 65.2 (105) | 66.3 (61) | 0.861        |
| No                                              | 42.9 (48)  | 27.7 (39)  |              | 34.8 (56)  | 33.7 (31) |              |
| Sputum with blood (n=253)                       |            |            |              |            |           |              |
| Yes                                             | 8.0 (9)    | 17.7 (25)  | <b>0.025</b> | 14.3 (23)  | 12.0 (11) | 0.601        |
| No                                              | 92.0 (103) | 82.3 (116) |              | 85.7 (138) | 88.0 (81) |              |
| Fever (n=253)                                   |            |            |              |            |           |              |
| Yes                                             | 50.9 (57)  | 50.4 (71)  | 0.932        | 50.3 (81)  | 51.1 (47) | 0.905        |
| No                                              | 49.1 (55)  | 49.6 (70)  |              | 49.7 (80)  | 48.9 (45) |              |
| Weight loss (n=253)                             |            |            |              |            |           |              |
| Yes                                             | 28.6 (32)  | 44.7 (63)  | <b>0.009</b> | 44.7 (72)  | 25.0 (23) | <b>0.002</b> |
| No                                              | 71.4 (80)  | 55.3 (78)  |              | 55.3 (89)  | 75.0 (69) |              |
| Tiredness/weakness (n=253)                      |            |            |              |            |           |              |
| Yes                                             | 38.4 (43)  | 52.5 (74)  | <b>0.026</b> | 50.9 (82)  | 38.0 (35) | <b>0.048</b> |
| No                                              | 61.1 (69)  | 47.5 (67)  |              | 49.1 (79)  | 62.0 (57) |              |
| Dizziness (n=253)                               |            |            |              |            |           |              |
| Yes                                             | 4.5 (5)    | 6.4 (9)    | 0.507        | 6.8 (11)   | 3.3 (3)   | 0.232        |
| No                                              | 95.5 (107) | 93.6 (132) |              | 93.2 (150) | 96.7 (89) |              |
| Chest pain (n=253)                              |            |            |              |            |           |              |
| Yes                                             | 17.0 (19)  | 30.5 (43)  | <b>0.013</b> | 28.6 (46)  | 17.4 (16) | <b>0.047</b> |
| No                                              | 83.0 (93)  | 69.5 (98)  |              | 71.4 (115) | 82.6 (76) |              |
| Night sweat (n=253)                             |            |            |              |            |           |              |
| Yes                                             | 20.5 (23)  | 30.5 (43)  | 0.073        | 31.1 (50)  | 17.4 (16) | <b>0.017</b> |
| No                                              | 79.5 (89)  | 69.5 (98)  |              | 68.9 (111) | 82.6 (76) |              |
| <b>Did you think you had TB? (n=252)</b>        |            |            |              |            |           |              |
| Yes                                             | 5.4 (6)    | 11.4 (16)  | 0.090        | 11.8 (19)  | 3.3 (3)   | <b>0.022</b> |
| No                                              | 94.6 (106) | 88.6 (124) |              | 88.2 (142) | 96.7 (88) |              |
| <b>Factors for delay in seeking care</b>        |            |            |              |            |           |              |
| Not aware of symptoms (n=253)                   |            |            |              |            |           |              |
| Yes                                             | 38.4 (43)  | 43.3 (61)  | 0.434        | 57.1 (92)  | 62.0 (57) | 0.454        |

|                                                                     |             |            |              |             |           |       |
|---------------------------------------------------------------------|-------------|------------|--------------|-------------|-----------|-------|
| No                                                                  | 61.6 (69)   | 56.7 (80)  |              | 42.9 (69)   | 38.0 (35) |       |
| Fear of rejection/losing job (n=253)                                |             |            |              |             |           |       |
| Yes                                                                 | 2.7 (3)     | 6.4 (9)    | 0.169        | 5.6 (9)     | 3.3 (3)   | 0.402 |
| No                                                                  | 97.3 (109)  | 93.6 (132) |              | 94.4 (152)  | 96.7 (89) |       |
| Costs (n=253)                                                       |             |            |              |             |           |       |
| Yes                                                                 | 0.0 (0)     | 9.2 (13)   | <b>0.001</b> | 5.6 (9)     | 4.3 (4)   | 0.667 |
| No                                                                  | 100.0 (112) | 90.8 (128) |              | 94.4 (152)  | 95.7 (88) |       |
| Lack of time (n=253)                                                |             |            |              |             |           |       |
| Yes                                                                 | 5.4 (6)     | 7.1 (10)   | 0.573        | 5.6 (9)     | 7.6 (7)   | 0.526 |
| No                                                                  | 94.6 (106)  | 92.9 (131) |              | 94.4 (152)  | 92.4 (85) |       |
| Distance to health centre (n=253)                                   |             |            |              |             |           |       |
| Yes                                                                 | 0.9 (1)     | 2.8 (4)    | 0.270        | 2.5 (4)     | 1.1 (1)   | 0.442 |
| No                                                                  | 99.1 (111)  | 97.2 (137) |              | 97.5 (157)  | 98.9 (91) |       |
| Lack of transportation (n=253)                                      |             |            |              |             |           |       |
| Yes                                                                 | 0.9 (1)     | 0.7 (1)    | 0.870        | 0.0 (0)     | 2.2 (2)   | 0.060 |
| No                                                                  | 99.1 (111)  | 99.3 (140) |              | 100.0 (161) | 97.8 (90) |       |
| Previous non-satisfactory experience with the health system (n=253) |             |            |              |             |           |       |
| Yes                                                                 | 1.8 (2)     | 2.1 (3)    | 0.846        | 1.9 (3)     | 2.2 (2)   | 0.864 |
| No                                                                  | 98.2 (110)  | 97.9 (138) |              | 98.1 (158)  | 97.8 (90) |       |

\*p-values <0.05 are indicated in bold

TB: tuberculosis

Table S4. Attitude towards TB stratified for gender and country of birth

|                                                                                                         | Italian-born<br>% (N) | Foreign-born<br>% (N) | p*               | Males<br>% (N) | Females<br>% (N) | p*               |
|---------------------------------------------------------------------------------------------------------|-----------------------|-----------------------|------------------|----------------|------------------|------------------|
| <b>Should people with TB disclose their illness to other people? (n=252)</b>                            |                       |                       |                  |                |                  |                  |
| Yes                                                                                                     | 70.5 (79)             | 47.1 (66)             | <b>0.001</b>     | 53.1 (85)      | 65.2 (60)        | <b>0.040</b>     |
| No                                                                                                      | 8.9 (10)              | 19.3 (27)             |                  | 18.8 (30)      | 7.6 (7)          |                  |
| Don't know                                                                                              | 20.5 (23)             | 33.6 (47)             |                  | 28.1 (45)      | 27.2 (25)        |                  |
| <b>Who do you think is more likely to get TB, men or women? (n=252)</b>                                 |                       |                       |                  |                |                  |                  |
| Men                                                                                                     | 12.5 (14)             | 15.0 (21)             | 0.305            | 21.2 (34)      | 1.1 (1)          | <b>&lt;0.001</b> |
| Women                                                                                                   | 5.4 (6)               | 10.0 (14)             |                  | 4.4 (7)        | 14.1 (13)        |                  |
| Don't know                                                                                              | 82.1 (92)             | 75.0 (105)            |                  | 74.9 (119)     | 84.8 (78)        |                  |
| <b>How did you feel when you found out that you had TB? (n=253)</b>                                     |                       |                       |                  |                |                  |                  |
| Scared                                                                                                  | 37.5 (42)             | 45.4 (64)             | 0.376            | 36.6 (59)      | 51.1 (47)        | 0.164            |
| Depressed                                                                                               | 20.5 (23)             | 14.2 (20)             |                  | 18.0 (29)      | 15.2 (14)        |                  |
| Didn't believe (denial)                                                                                 | 29.5 (33)             | 31.2 (44)             |                  | 33.5 (54)      | 25.0 (23)        |                  |
| Other                                                                                                   | 12.5 (14)             | 9.2 (13)              |                  | 11.8 (19)      | 8.7 (8)          |                  |
| <b>Did you inform your friends/ family that you had TB? (n=248)</b>                                     |                       |                       |                  |                |                  |                  |
| Yes                                                                                                     | 90.9 (100)            | 55.1 (76)             | <b>&lt;0.001</b> | 61.4 (97)      | 87.8 (79)        | <b>&lt;0.001</b> |
| No                                                                                                      | 9.1 (10)              | 44.9 (62)             |                  | 38.6 (61)      | 12.2 (11)        |                  |
| <b>Have your relationships with your friends/ family changed since finding out you have TB? (n=245)</b> |                       |                       |                  |                |                  |                  |
| Yes                                                                                                     | 22.0 (24)             | 14.7 (20)             | 0.138            | 15.4 (24)      | 22.5 (20)        | 0.165            |
| No                                                                                                      | 78.0 (85)             | 85.3 (116)            |                  | 84.6 (132)     | 77.5 (69)        |                  |
| <b>If yes, how? (n=43)</b>                                                                              |                       |                       |                  |                |                  |                  |
| Improved                                                                                                | 41.7 (10)             | 10.5 (2)              | <b>0.024</b>     | 26.1 (6)       | 30.0 (6)         | 0.775            |
| Worsened                                                                                                | 58.3 (14)             | 89.5 (17)             |                  | 73.9 (17)      | 70.0 (14)        |                  |
| <b>Are people with TB discriminated in the community? (n=249)</b>                                       |                       |                       |                  |                |                  |                  |
| Yes                                                                                                     | 46.4 (51)             | 41.0 (57)             | <b>0.002</b>     | 40.3 (64)      | 48.9 (44)        | 0.386            |
| No                                                                                                      | 33.6 (37)             | 19.4 (27)             |                  | 26.4 (42)      | 24.4 (22)        |                  |
| Don't know                                                                                              | 20.0 (22)             | 39.6 (55)             |                  | 33.3 (53)      | 26.7 (24)        |                  |
| <b>Among TB patients, are male or female patients more discriminated? (n=249)</b>                       |                       |                       |                  |                |                  |                  |
| Male                                                                                                    | 3.7 (4)               | 9.3 (13)              | <b>0.027</b>     | 10.1 (16)      | 1.1 (1)          | <b>&lt;0.001</b> |
| Female                                                                                                  | 2.85 (3)              | 8.6 (12)              |                  | 2.5 (4)        | 12.1 (11)        |                  |
| Don't know                                                                                              | 93.6 (102)            | 82.1 (115)            |                  | 87.3 (138)     | 86.8 (79)        |                  |

\*p-values <0.05 are indicated in bold

TB: tuberculosis

1  
2  
3  
4  
5  
6  
7  
8  
9  
10  
11  
12  
13  
14  
15  
16  
17  
18  
19  
20  
21  
22  
23  
24  
25  
26  
27  
28  
29  
30  
31  
32  
33  
34  
35  
36  
37  
38  
39  
40  
41  
42  
43  
44  
45  
46  
47  
48  
49  
50  
51  
52  
53  
54  
55  
56  
57  
58  
59  
60**Table S5. Risk analysis for DD (Univariate and logistic regression analysis)**

|                                                                                       | <b>DD<br/>&gt;7 days<br/>%</b> | <b>OR<br/>95%CI</b>       | <b>p</b>         | <b>aOR<br/>95%CI</b>      | <b>p</b>         |
|---------------------------------------------------------------------------------------|--------------------------------|---------------------------|------------------|---------------------------|------------------|
| <b>Foreign-born patients</b>                                                          |                                |                           |                  |                           |                  |
| Yes <sup>^</sup>                                                                      | 36.6                           | <b>1</b>                  | <b>&lt;0.001</b> | <b>1</b>                  | <b>0.024</b>     |
| No                                                                                    | 64.7                           | <b>0.32 (0.18 – 0.54)</b> |                  | <b>0.48 (0.25 – 0.91)</b> |                  |
| <b>Chronic disease</b>                                                                |                                |                           |                  |                           |                  |
| Yes <sup>^</sup>                                                                      | 59.3                           | <b>1</b>                  | 0.061            | -                         | -                |
| No                                                                                    | 45.1                           | 1.77 (0.97 – 3.24)        |                  |                           |                  |
| <b>Gender</b>                                                                         |                                |                           |                  |                           |                  |
| Female <sup>^</sup>                                                                   | 37.5                           | <b>1</b>                  | <b>0.008</b>     | <b>1</b>                  | <b>&lt;0.001</b> |
| Male                                                                                  | 55.9                           | <b>0.47 (0.27 – 0.83)</b> |                  | <b>0.30 (0.15 – 0.58)</b> |                  |
| <b>First visit with GP</b>                                                            |                                |                           |                  |                           |                  |
| Yes <sup>^</sup>                                                                      | 71.2                           | <b>1</b>                  | <b>&lt;0.001</b> | -                         | -                |
| No                                                                                    | 40.5                           | <b>3.63 (1.95 – 6.77)</b> |                  |                           |                  |
| <b>First visit athospital</b>                                                         |                                |                           |                  |                           |                  |
| Yes <sup>^</sup>                                                                      | 36.1                           | <b>1</b>                  | <b>&lt;0.001</b> | <b>1</b>                  | <b>0.002</b>     |
| No                                                                                    | 67.0                           | <b>0.28 (0.16 – 0.49)</b> |                  | <b>0.35 (0.18 – 0.67)</b> |                  |
| <b>After first visit, did you seek treatment from somewhere else?</b>                 |                                |                           |                  |                           |                  |
| Yes <sup>^</sup>                                                                      | 71.0                           | <b>1</b>                  | <b>&lt;0.001</b> | -                         | -                |
| No                                                                                    | 34.4                           | <b>4.67 (2.62 – 8.31)</b> |                  |                           |                  |
| <b>Cough more than 3 weeks</b>                                                        |                                |                           |                  |                           |                  |
| Yes <sup>^</sup>                                                                      | 44.2                           | <b>1</b>                  | <b>0.035</b>     | <b>1</b>                  | <b>0.048</b>     |
| No                                                                                    | 59.0                           | <b>0.55 (0.32 – 0.96)</b> |                  | <b>0.51 (0.27 – 0.99)</b> |                  |
| <b>Dizziness</b>                                                                      |                                |                           |                  |                           |                  |
| Yes <sup>^</sup>                                                                      | 23.1                           | <b>1</b>                  | <b>0.051</b>     | <b>1</b>                  | <b>0.039</b>     |
| No                                                                                    | 50.9                           | <b>0.28 (0.08 – 1.08)</b> |                  | <b>0.21 (0.04 – 0.92)</b> |                  |
| <b>Prior unspecific treatment</b>                                                     |                                |                           |                  |                           |                  |
| Yes <sup>^</sup>                                                                      | 60.4                           | <b>1</b>                  | <b>&lt;0.001</b> | <b>1</b>                  | <b>0.002</b>     |
| No                                                                                    | 33.0                           | <b>3.11 (1.78 – 5.43)</b> |                  | <b>2.85 (1.47 – 5.52)</b> |                  |
| <b>Did you have repeated visits with different providers in a different facility?</b> |                                |                           |                  |                           |                  |
| Yes <sup>^</sup>                                                                      | 66.3                           | <b>1</b>                  | <b>&lt;0.001</b> | -                         | -                |
| No                                                                                    | 37.6                           | <b>3.26 (1.82 – 5.86)</b> |                  |                           |                  |

\*p-values &lt;0.05 are indicated in bold

<sup>^</sup> reference category
