# Supplementary material for: Determinants of patient and health system delay among Italian and foreign-born patients with pulmonary tuberculosis: a multicentre cross-sectional study
Source: PubMed Central journal article supplement — BMJ Open. 2018 Aug 5;8(8):e019673. doi: 10.1136/bmjopen-2017-019673 (PMC6078265; doi:10.1136/bmjopen-2017-019673), 2018-08-05
Supplement: bmjopen-2017-019673supp001.pdf [file bmjopen-2017-019673supp001.pdf]

## Supplementary material

**Table S1. Proportion of missing data, for the variables included in the multivariable analyses**

| Variable                                                                       | N  | %    |
|--------------------------------------------------------------------------------|----|------|
| Stigma                                                                         | 1  | 0.4  |
| Prior unspecific treatment                                                     | 1  | 0.4  |
| Did you think you had TB?                                                      | 1  | 0.4  |
| Do you know what TB is?                                                        | 1  | 0.4  |
| Chronic diseases                                                               | 2  | 0.8  |
| After first visit, did you seek treatment from somewhere else?                 | 5  | 2.0  |
| First visit with GP                                                            | 6  | 2.4  |
| First visit at hospital                                                        | 6  | 2.4  |
| Age                                                                            | 7  | 2.8  |
| Do you know how TB is diagnosed?                                               | 13 | 5.1  |
| Pay for transportation to reach the health centre                              | 21 | 8.3  |
| Patient Delay                                                                  | 22 | 8.7  |
| Health system delay                                                            | 22 | 8.7  |
| Diagnostic delay                                                               | 28 | 11.1 |
| Treatment delay                                                                | 34 | 13.4 |
| Did you have repeated visits with different providers in a different facility? | 35 | 13.8 |
| Did you have repeated visits with the same provider?                           | 35 | 13.8 |
| Total delay                                                                    | 45 | 17.8 |
| Close distance of the first visit place                                        | 55 | 21.7 |

**Table S2. Median delays from literature and prevalence of delay in the present study**

| Delay/<br>Prevalence of<br>delay | Pezzotti et<br>al. 2015<br>(Italy) <sup>13</sup> | Saldana et<br>al., 2013<br>(UK) <sup>19</sup> | Tattevin et<br>al., 2012<br>(France) <sup>24</sup> | Farah et al.,<br>2006<br>(Norway) <sup>25</sup> | Jurcev-<br>Savicevic et<br>al. 2013<br>(Croatia) <sup>276</sup> |
|----------------------------------|--------------------------------------------------|-----------------------------------------------|----------------------------------------------------|-------------------------------------------------|-----------------------------------------------------------------|
| Median PD<br>(days)              | 31                                               | 29                                            | 14                                                 | 28                                              |                                                                 |
| Prevalence of<br>PD*             | 64.5                                             | 50.2                                          | 59.7                                               | 50.2                                            |                                                                 |
| Median HSD<br>(days)             | 15                                               | 30                                            | -                                                  | 33                                              | 15                                                              |
| Prevalence of<br>HSD*            | 40.9                                             | 29.3                                          | -                                                  | 25.3                                            | 40.9                                                            |
| Median TOTD<br>(days)            | -                                                | 62                                            | -                                                  | 63                                              | -                                                               |
| Prevalence of<br>TOTD*           | -                                                | 42.3                                          | -                                                  | 40.9                                            | -                                                               |

\*Prevalence of delay that would have been retrieved in our study, by applying median values from other studies

**Table S3. Correctness of patients' knowledge and symptoms recognition stratified for gender and country of birth**

| Characteristics                                                                                | Italian-born<br>% (N) | Foreign-born<br>% (N) | p*               | Males<br>% (N) | Females<br>% (N) | p*    |
|------------------------------------------------------------------------------------------------|-----------------------|-----------------------|------------------|----------------|------------------|-------|
| <b>Do you know what TB is? (n=252)</b>                                                         |                       |                       |                  |                |                  |       |
| Yes                                                                                            | 81.2 (91)             | 56.4 (79)             | <b>&lt;0.001</b> | 65.8<br>(106)  | 70.3 (64)        | 0.465 |
| No                                                                                             | 18.8 (21)             | 43.6 (61)             |                  | 34.2<br>(55)   | 29.7 (27)        |       |
| <b>Do you think TB is a serious disease? (n=250)</b>                                           |                       |                       |                  |                |                  |       |
| Yes                                                                                            | 67.9 (76)             | 57.2 (79)             | <b>0.029</b>     | 63.9<br>(101)  | 58.7 (54)        | 0.309 |
| No                                                                                             | 17.9 (20)             | 14.5 (20)             |                  | 13.3<br>(21)   | 20.7 (19)        |       |
| Don't know                                                                                     | 14.3 (16)             | 28.3 (39)             |                  | 22.8<br>(36)   | 20.7<br>(19)     |       |
| <b>What causes TB? (n=248)</b>                                                                 |                       |                       |                  |                |                  |       |
| Infection                                                                                      | 77.5 (86)             | 43.8 (60)             | <b>&lt;0.001</b> | 61.1<br>(96)   | 54.9 (50)        | 0.491 |
| Punishment                                                                                     | 1.8 (2)               | 0.7 (1)               |                  | 1.3 (2)        | 1.1 (1)          |       |
| Unavoidable                                                                                    | 0.0 (0)               | 1.5 (2)               |                  | 1.3 (2)        | 0.0 (0)          |       |
| Don't know                                                                                     | 20.7 (23)             | 54.0 (74)             |                  | 36.3<br>(57)   | 44.0 (40)        |       |
| <b>What are the symptoms TB? (n=253)</b>                                                       |                       |                       |                  |                |                  |       |
| Cough for more than 3 weeks                                                                    | 58.0 (65)             | 49.6 (70)             | <b>0.105</b>     | 54.7<br>(88)   | 51.1 (47)        | 0.890 |
| Sputum with blood                                                                              | 13.4 (15)             | 9.2 (13)              |                  | 11.2<br>(18)   | 10.9 (10)        |       |
| Fever                                                                                          | 15.2 (17)             | 14.2 (20)             |                  | 13.7<br>(22)   | 16.3 (15)        |       |
| Weight loss                                                                                    | 2.7 (3)               | 3.5 (5)               |                  | 3.7 (6)        | 2.2 (2)          |       |
| Don't know                                                                                     | 10.7 (12)             | 23.4 (33)             |                  | 16.8<br>(27)   | 19.7 (18)        |       |
| <b>How a person can get TB? (n=242)</b>                                                        |                       |                       |                  |                |                  |       |
| Through germs present in air droplets expelled in the cough                                    | 69.4 (72)             | 37.7 (52)             | <b>&lt;0.001</b> | 55.8<br>(87)   | 43.0 (37)        | 0.147 |
| Sharing utensils and objects with an infected person                                           | 3.8 (4)               | 7.2 (10)              |                  | 5.8 (9)        | 5.8 (5)          |       |
| Don't know                                                                                     | 26.9 (28)             | 55.1 (76)             |                  | 38.5<br>(60)   | 51.2 (44)        |       |
| <b>How TB is diagnosed? (n=240)</b>                                                            |                       |                       |                  |                |                  |       |
| Through sputum examination                                                                     | 39.0 (39)             | 17.1 (24)             | <b>&lt;0.001</b> | 23.7<br>(37)   | 31.0 (26)        | 0.409 |
| Through X-ray                                                                                  | 32.0 (32)             | 25.7 (36)             |                  | 28.2<br>(44)   | 28.6 (24)        |       |
| Don't know                                                                                     | 29.0 (29)             | 57.1 (80)             |                  | 48.1<br>(75)   | 40.4 (34)        |       |
| <b>Can TB be cured? (n=249)</b>                                                                |                       |                       |                  |                |                  |       |
| Yes                                                                                            | 93.6<br>(103)         | 76.3 (106)            | <b>0.001</b>     | 84.8<br>(134)  | 82.4 (75)        | 0.858 |
| No                                                                                             | 0.0 (0)               | 2.2 (3)               |                  | 1.3 (2)        | 1.1 (1)          |       |
| Don't know                                                                                     | 6.4 (7)               | 21.6 (30)             |                  | 13.9<br>(22)   | 16.5 (15)        |       |
| <b>Can TB require a longer treatment to be cured as for multidrug resistant forms? (n=251)</b> |                       |                       |                  |                |                  |       |

|                                                 |               |            |              |               |              |              |
|-------------------------------------------------|---------------|------------|--------------|---------------|--------------|--------------|
| Yes                                             | 51.8 (58)     | 34.5 (48)  | <b>0.016</b> | 41.0<br>(66)  | 44.4 (40)    | 0.868        |
| No                                              | 10.7 (12)     | 18.7 (26)  |              | 15.5<br>(25)  | 14.4 (13)    |              |
| Don't know                                      | 37.5 (42)     | 46.8 (65)  |              | 43.5<br>(70)  | 41.2 (37)    |              |
| <b>Which symptoms made you seek healthcare?</b> |               |            |              |               |              |              |
| Cough for more than 3 weeks (n=253)             |               |            |              |               |              |              |
| Yes                                             | 57.1 (64)     | 72.3 (102) | <b>0.011</b> | 65.2<br>(105) | 66.3 (61)    | 0.861        |
| No                                              | 42.9 (48)     | 27.7 (39)  |              | 34.8<br>(56)  | 33.7 (31)    |              |
| Sputum with blood (n=253)                       |               |            |              |               |              |              |
| Yes                                             | 8.0 (9)       | 17.7 (25)  | <b>0.025</b> | 14.3<br>(23)  | 12.0 (11)    | 0.601        |
| No                                              | 92.0<br>(103) | 82.3 (116) |              | 85.7<br>(138) | 88.0 (81)    |              |
| Fever (n=253)                                   |               |            |              |               |              |              |
| Yes                                             | 50.9 (57)     | 50.4 (71)  | 0.932        | 50.3<br>(81)  | 51.1 (47)    | 0.905        |
| No                                              | 49.1 (55)     | 49.6 (70)  |              | 49.7<br>(80)  | 48.9 (45)    |              |
| Weight loss (n=253)                             |               |            |              |               |              |              |
| Yes                                             | 28.6 (32)     | 44.7 (63)  | <b>0.009</b> | 44.7<br>(72)  | 25.0 (23)    | <b>0.002</b> |
| No                                              | 71.4 (80)     | 55.3 (78)  |              | 55.3<br>(89)  | 75.0 (69)    |              |
| Tiredness/weakness (n=253)                      |               |            |              |               |              |              |
| Yes                                             | 38.4 (43)     | 52.5 (74)  | <b>0.026</b> | 50.9<br>(82)  | 38.0 (35)    | <b>0.048</b> |
| No                                              | 61.1 (69)     | 47.5 (67)  |              | 49.1<br>(79)  | 62.0 (57)    |              |
| Dizziness (n=253)                               |               |            |              |               |              |              |
| Yes                                             | 4.5 (5)       | 6.4 (9)    | 0.507        | 6.8 (11)      | 3.3 (3)      | 0.232        |
| No                                              | 95.5<br>(107) | 93.6 (132) |              | 93.2<br>(150) | 96.7 (89)    |              |
| Chest pain (n=253)                              |               |            |              |               |              |              |
| Yes                                             | 17.0 (19)     | 30.5 (43)  | <b>0.013</b> | 28.6<br>(46)  | 17.4 (16)    | <b>0.047</b> |
| No                                              | 83.0 (93)     | 69.5 (98)  |              | 71.4<br>(115) | 82.6 (76)    |              |
| Night sweat (n=253)                             |               |            |              |               |              |              |
| Yes                                             | 20.5 (23)     | 30.5 (43)  | 0.073        | 31.1<br>(50)  | 17.4 (16)    | <b>0.017</b> |
| No                                              | 79.5 (89)     | 69.5 (98)  |              | 68.9<br>(111) | 82.6 (76)    |              |
| <b>Did you think you had TB? (n=252)</b>        |               |            |              |               |              |              |
| Yes                                             | 5.4 (6)       | 11.4 (16)  | 0.090        | 11.8<br>(19)  | 3.3 (3)      | <b>0.022</b> |
| No                                              | 94.6<br>(106) | 88.6 (124) |              | 88.2<br>(142) | 96.7<br>(88) |              |
| <b>Factors for delay in seeking care</b>        |               |            |              |               |              |              |
| Not aware of symptoms (n=253)                   |               |            |              |               |              |              |
| Yes                                             | 38.4 (43)     | 43.3 (61)  | 0.434        | 57.1<br>(92)  | 62.0 (57)    | 0.454        |

|                                                                     |             |            |              |             |           |       |
|---------------------------------------------------------------------|-------------|------------|--------------|-------------|-----------|-------|
| No                                                                  | 61.6 (69)   | 56.7 (80)  |              | 42.9 (69)   | 38.0 (35) |       |
| Fear of rejection/losing job (n=253)                                |             |            |              |             |           |       |
| Yes                                                                 | 2.7 (3)     | 6.4 (9)    | 0.169        | 5.6 (9)     | 3.3 (3)   | 0.402 |
| No                                                                  | 97.3 (109)  | 93.6 (132) |              | 94.4 (152)  | 96.7 (89) |       |
| Costs (n=253)                                                       |             |            |              |             |           |       |
| Yes                                                                 | 0.0 (0)     | 9.2 (13)   | <b>0.001</b> | 5.6 (9)     | 4.3 (4)   | 0.667 |
| No                                                                  | 100.0 (112) | 90.8 (128) |              | 94.4 (152)  | 95.7 (88) |       |
| Lack of time (n=253)                                                |             |            |              |             |           |       |
| Yes                                                                 | 5.4 (6)     | 7.1 (10)   | 0.573        | 5.6 (9)     | 7.6 (7)   | 0.526 |
| No                                                                  | 94.6 (106)  | 92.9 (131) |              | 94.4 (152)  | 92.4 (85) |       |
| Distance to health centre (n=253)                                   |             |            |              |             |           |       |
| Yes                                                                 | 0.9 (1)     | 2.8 (4)    | 0.270        | 2.5 (4)     | 1.1 (1)   | 0.442 |
| No                                                                  | 99.1 (111)  | 97.2 (137) |              | 97.5 (157)  | 98.9 (91) |       |
| Lack of transportation (n=253)                                      |             |            |              |             |           |       |
| Yes                                                                 | 0.9 (1)     | 0.7 (1)    | 0.870        | 0.0 (0)     | 2.2 (2)   | 0.060 |
| No                                                                  | 99.1 (111)  | 99.3 (140) |              | 100.0 (161) | 97.8 (90) |       |
| Previous non-satisfactory experience with the health system (n=253) |             |            |              |             |           |       |
| Yes                                                                 | 1.8 (2)     | 2.1 (3)    | 0.846        | 1.9 (3)     | 2.2 (2)   | 0.864 |
| No                                                                  | 98.2 (110)  | 97.9 (138) |              | 98.1 (158)  | 97.8 (90) |       |

\*p-values <0.05 are indicated in bold

TB: tuberculosis

**Table S4. Attitude towards TB stratified for gender and country of birth**

|                                                                                                         | Italian-born<br>% (N) | Foreign-born<br>% (N) | p*               | Males<br>% (N) | Females<br>% (N) | p*               |
|---------------------------------------------------------------------------------------------------------|-----------------------|-----------------------|------------------|----------------|------------------|------------------|
| <b>Should people with TB disclose their illness to other people? (n=252)</b>                            |                       |                       |                  |                |                  |                  |
| Yes                                                                                                     | 70.5 (79)             | 47.1 (66)             | <b>0.001</b>     | 53.1 (85)      | 65.2 (60)        | <b>0.040</b>     |
| No                                                                                                      | 8.9 (10)              | 19.3 (27)             |                  | 18.8 (30)      | 7.6 (7)          |                  |
| Don't know                                                                                              | 20.5 (23)             | 33.6 (47)             |                  | 28.1 (45)      | 27.2 (25)        |                  |
| <b>Who do you think is more likely to get TB, men or women? (n=252)</b>                                 |                       |                       |                  |                |                  |                  |
| Men                                                                                                     | 12.5 (14)             | 15.0 (21)             | 0.305            | 21.2 (34)      | 1.1 (1)          | <b>&lt;0.001</b> |
| Women                                                                                                   | 5.4 (6)               | 10.0 (14)             |                  | 4.4 (7)        | 14.1 (13)        |                  |
| Don't know                                                                                              | 82.1 (92)             | 75.0 (105)            |                  | 74.9 (119)     | 84.8 (78)        |                  |
| <b>How did you feel when you found out that you had TB? (n=253)</b>                                     |                       |                       |                  |                |                  |                  |
| Scared                                                                                                  | 37.5 (42)             | 45.4 (64)             | 0.376            | 36.6 (59)      | 51.1 (47)        | 0.164            |
| Depressed                                                                                               | 20.5 (23)             | 14.2 (20)             |                  | 18.0 (29)      | 15.2 (14)        |                  |
| Didn't believe (denial)                                                                                 | 29.5 (33)             | 31.2 (44)             |                  | 33.5 (54)      | 25.0 (23)        |                  |
| Other                                                                                                   | 12.5 (14)             | 9.2 (13)              |                  | 11.8 (19)      | 8.7 (8)          |                  |
| <b>Did you inform your friends/ family that you had TB? (n=248)</b>                                     |                       |                       |                  |                |                  |                  |
| Yes                                                                                                     | 90.9 (100)            | 55.1 (76)             | <b>&lt;0.001</b> | 61.4 (97)      | 87.8 (79)        | <b>&lt;0.001</b> |
| No                                                                                                      | 9.1 (10)              | 44.9 (62)             |                  | 38.6 (61)      | 12.2 (11)        |                  |
| <b>Have your relationships with your friends/ family changed since finding out you have TB? (n=245)</b> |                       |                       |                  |                |                  |                  |
| Yes                                                                                                     | 22.0 (24)             | 14.7 (20)             | 0.138            | 15.4 (24)      | 22.5 (20)        | 0.165            |
| No                                                                                                      | 78.0 (85)             | 85.3 (116)            |                  | 84.6 (132)     | 77.5 (69)        |                  |
| <b>If yes, how? (n=43)</b>                                                                              |                       |                       |                  |                |                  |                  |
| Improved                                                                                                | 41.7 (10)             | 10.5 (2)              | <b>0.024</b>     | 26.1 (6)       | 30.0 (6)         | 0.775            |
| Worsened                                                                                                | 58.3 (14)             | 89.5 (17)             |                  | 73.9 (17)      | 70.0 (14)        |                  |
| <b>Are people with TB discriminated in the community? (n=249)</b>                                       |                       |                       |                  |                |                  |                  |
| Yes                                                                                                     | 46.4 (51)             | 41.0 (57)             | <b>0.002</b>     | 40.3 (64)      | 48.9 (44)        | 0.386            |
| No                                                                                                      | 33.6 (37)             | 19.4 (27)             |                  | 26.4 (42)      | 24.4 (22)        |                  |
| Don't know                                                                                              | 20.0 (22)             | 39.6 (55)             |                  | 33.3 (53)      | 26.7 (24)        |                  |
| <b>Among TB patients, are male or female patients more discriminated? (n=249)</b>                       |                       |                       |                  |                |                  |                  |
| Male                                                                                                    | 3.7 (4)               | 9.3 (13)              | <b>0.027</b>     | 10.1 (16)      | 1.1 (1)          | <b>&lt;0.001</b> |
| Female                                                                                                  | 2.85 (3)              | 8.6 (12)              |                  | 2.5 (4)        | 12.1 (11)        |                  |
| Don't know                                                                                              | 93.6 (102)            | 82.1 (115)            |                  | 87.3 (138)     | 86.8 (79)        |                  |

\*p-values <0.05 are indicated in bold

TB: tuberculosis

**Table S5. Risk analysis for DD (Univariate and logistic regression analysis)**

|                                                                                       | <b>DD<br/>&gt;7 days<br/>%</b> | <b>OR<br/>95%CI</b>       | <b>p</b>         | <b>aOR<br/>95%CI</b>      | <b>p</b>         |
|---------------------------------------------------------------------------------------|--------------------------------|---------------------------|------------------|---------------------------|------------------|
| <b>Foreign-born patients</b>                                                          |                                |                           |                  |                           |                  |
| Yes <sup>^</sup>                                                                      | 36.6                           | <b>1</b>                  | <b>&lt;0.001</b> | <b>1</b>                  | <b>0.024</b>     |
| No                                                                                    | 64.7                           | <b>0.32 (0.18 – 0.54)</b> |                  | <b>0.48 (0.25 – 0.91)</b> |                  |
| <b>Chronic disease</b>                                                                |                                |                           |                  |                           |                  |
| Yes <sup>^</sup>                                                                      | 59.3                           | <b>1</b>                  | 0.061            | -                         | -                |
| No                                                                                    | 45.1                           | 1.77 (0.97 – 3.24)        |                  |                           |                  |
| <b>Gender</b>                                                                         |                                |                           |                  |                           |                  |
| Female <sup>^</sup>                                                                   | 37.5                           | <b>1</b>                  | <b>0.008</b>     | <b>1</b>                  | <b>&lt;0.001</b> |
| Male                                                                                  | 55.9                           | <b>0.47 (0.27 – 0.83)</b> |                  | <b>0.30 (0.15 – 0.58)</b> |                  |
| <b>First visit with GP</b>                                                            |                                |                           |                  |                           |                  |
| Yes <sup>^</sup>                                                                      |                                | <b>1</b>                  | <b>&lt;0.001</b> | -                         | -                |
| No                                                                                    | 71.2<br>40.5                   | <b>3.63 (1.95 – 6.77)</b> |                  |                           |                  |
| <b>First visit athospital</b>                                                         |                                |                           |                  |                           |                  |
| Yes <sup>^</sup>                                                                      | 36.1                           | <b>1</b>                  | <b>&lt;0.001</b> | <b>1</b>                  | <b>0.002</b>     |
| No                                                                                    | 67.0                           | <b>0.28 (0.16 – 0.49)</b> |                  | <b>0.35 (0.18 – 0.67)</b> |                  |
| <b>After first visit, did you seek treatment from somewhere else?</b>                 |                                |                           |                  |                           |                  |
| Yes <sup>^</sup>                                                                      | 71.0                           | <b>1</b>                  | <b>&lt;0.001</b> | -                         | -                |
| No                                                                                    | 34.4                           | <b>4.67 (2.62 – 8.31)</b> |                  |                           |                  |
| <b>Cough more than 3 weeks</b>                                                        |                                |                           |                  |                           |                  |
| Yes <sup>^</sup>                                                                      | 44.2                           | <b>1</b>                  | <b>0.035</b>     | <b>1</b>                  | <b>0.048</b>     |
| No                                                                                    | 59.0                           | <b>0.55 (0.32 – 0.96)</b> |                  | <b>0.51 (0.27 – 0.99)</b> |                  |
| <b>Dizziness</b>                                                                      |                                |                           |                  |                           |                  |
| Yes <sup>^</sup>                                                                      | 23.1                           | <b>1</b>                  | <b>0.051</b>     | <b>1</b>                  | <b>0.039</b>     |
| No                                                                                    | 50.9                           | <b>0.28 (0.08 – 1.08)</b> |                  | <b>0.21 (0.04 – 0.92)</b> |                  |
| <b>Prior unspecific treatment</b>                                                     |                                |                           |                  |                           |                  |
| Yes <sup>^</sup>                                                                      | 60.4                           | <b>1</b>                  | <b>&lt;0.001</b> | <b>1</b>                  | <b>0.002</b>     |
| No                                                                                    | 33.0                           | <b>3.11 (1.78 – 5.43)</b> |                  | <b>2.85 (1.47 – 5.52)</b> |                  |
| <b>Did you have repeated visits with different providers in a different facility?</b> |                                |                           |                  |                           |                  |
| Yes <sup>^</sup>                                                                      | 66.3                           | <b>1</b>                  | <b>&lt;0.001</b> | -                         | -                |
| No                                                                                    | 37.6                           | <b>3.26 (1.82 – 5.86)</b> |                  |                           |                  |

\*p-values <0.05 are indicated in bold

<sup>^</sup> reference category
